# Supplementary material for: Phanogracilins A–C, New Bibenzochromenones of Crinoid Phanogenia gracilis (Hartlaub, 1890)
Source: MDPI journal article supplement (doi:10.3390/biom14020151), 2024-01-26
Supplement: s1 [file s1]

## **- Supporting Information –**

### **Phanogracilins A-C, new bibenzochromenones of crinoid *Phanogenia gracilis* (Hartlaub, 1890)**

Vasileva E.A.<sup>1</sup>, Berdyshev D.V.<sup>1</sup>, Mishchenko N.P.<sup>1</sup>, Gerasimenko A.V.<sup>2</sup>, Menchinskaya E.S.<sup>1</sup>,  
Pislyagin E.A.<sup>1</sup>, Chingizova E.A.<sup>1</sup>, Kaluzhskiy L.A.<sup>3</sup>, Dautov S.Sh.<sup>4</sup>, Fedoreyev S.A.<sup>1</sup>

<sup>1</sup> G.B. Elyakov Pacific Institute of Bioorganic Chemistry, Far Eastern Branch of the Russian Academy of Sciences, Vladivostok 690022, Russia;

<sup>2</sup> Institute of Chemistry, Far Eastern Branch of the Russian Academy of Sciences, Vladivostok 690022, Russia;

<sup>3</sup> Institute of Biomedical Chemistry, Moscow 119121, Russia;

<sup>4</sup> A.V. Zhirmunsky National Scientific Center of Marine Biology, Far Eastern Branch of the Russian Academy of Sciences, Vladivostok 690041, Russia;

\* Correspondence: vasilieva\_el\_an@mail.ru; Tel.: +79025272055

## Table of contents

|                                                                                                                            |    |
|----------------------------------------------------------------------------------------------------------------------------|----|
| Figure S1. HPLC profile of ethanolic extract of <i>P. gracilis</i> , no acid was added .....                               | 4  |
| Figure S2. HPLC profile of acidified ethanolic extract of <i>P. gracilis</i> .....                                         | 4  |
| Figure S3. Data comparison of HPLC profiles of an ethanolic and of acidified ethanolic extract of <i>P. gracilis</i> ..... | 5  |
| Figure S4. HPLC profile of the CHCl <sub>3</sub> fraction of the acidified ethanolic extract of <i>P. gracilis</i> .....   | 5  |
| Figure S5. HPLC profile of the EtOAc fraction of the acidified ethanolic extract of <i>P. gracilis</i> .....               | 5  |
| Figure S6. Absorption spectrum of <b>3</b> (DAD) .....                                                                     | 6  |
| Figure S7. MS data of <b>3</b> .....                                                                                       | 6  |
| Figure S8. Absorption spectrum of <b>2</b> (DAD) .....                                                                     | 6  |
| Figure S9. MS data of <b>2</b> .....                                                                                       | 7  |
| Figure S10. Absorption spectrum of <b>1</b> (DAD) .....                                                                    | 7  |
| Figure S11. MS data of <b>1</b> .....                                                                                      | 7  |
| Figure S12. HRESIMS data of <b>1</b> and <b>2</b> .....                                                                    | 8  |
| Figure S13. HRESIMS data of <b>3</b> .....                                                                                 | 9  |
| Figure S14. IR spectrum of <b>1</b> (1900-1000 cm <sup>-1</sup> ) .....                                                    | 10 |
| Figure S15. IR spectrum of <b>1</b> (3800-2000 cm <sup>-1</sup> ) .....                                                    | 11 |
| Figure S16. <sup>1</sup> H NMR spectrum of <b>1</b> (DMSO- <i>d</i> <sub>6</sub> , 500 MHz) .....                          | 12 |
| Figure S17. Enlarged fragment of <sup>1</sup> H NMR spectrum of <b>1</b> (DMSO- <i>d</i> <sub>6</sub> , 500 MHz) .....     | 13 |
| Figure S18. Enlarged fragment of <sup>1</sup> H NMR spectrum of <b>1</b> (DMSO- <i>d</i> <sub>6</sub> , 500 MHz) .....     | 14 |
| Figure S19. Enlarged fragment of <sup>1</sup> H NMR spectrum of <b>1</b> (DMSO- <i>d</i> <sub>6</sub> , 500 MHz) .....     | 15 |
| Figure S20. <sup>1</sup> H NMR spectrum of <b>1</b> (acetone- <i>d</i> <sub>6</sub> , 700 MHz) .....                       | 16 |
| Figure S21. <sup>13</sup> C NMR spectrum of <b>1</b> (DMSO- <i>d</i> <sub>6</sub> , 126 MHz) .....                         | 17 |
| Figure S22. Enlarged fragment of <sup>13</sup> C NMR spectrum of <b>1</b> (DMSO- <i>d</i> <sub>6</sub> , 126 MHz) .....    | 18 |
| Figure S23. Enlarged fragment of <sup>13</sup> C NMR spectrum of <b>1</b> (DMSO- <i>d</i> <sub>6</sub> , 126 MHz) .....    | 19 |
| Figure S24. Enlarged fragment of <sup>13</sup> C NMR spectrum of <b>1</b> (acetone- <i>d</i> <sub>6</sub> , 126 MHz) ..... | 20 |
| Figure S25. Enlarged fragment of <sup>13</sup> C NMR spectrum of <b>1</b> (DMSO- <i>d</i> <sub>6</sub> , 126 MHz) .....    | 21 |
| Figure S26. HMBC correlations for <b>1</b> .....                                                                           | 22 |
| Table S1. Crystal data and structure refinement for <b>1</b> .....                                                         | 23 |
| Table S2. Selected bond lengths in the structure of <b>1</b> .....                                                         | 24 |
| Table S3. Hydrogen bonds in the structure of <b>1</b> (Å and °) .....                                                      | 27 |
| Figure S27. <sup>1</sup> H NMR spectrum of <b>2</b> (DMSO- <i>d</i> <sub>6</sub> , 500 MHz) .....                          | 28 |
| Figure S28. Enlarged fragment of <sup>1</sup> H NMR spectrum of <b>2</b> (DMSO- <i>d</i> <sub>6</sub> , 500 MHz) .....     | 29 |

|                                                                                                                                          |    |
|------------------------------------------------------------------------------------------------------------------------------------------|----|
| Figure S29. Enlarged fragment of $^1\text{H}$ NMR spectrum of <b>2</b> (DMSO- $d_6$ , 500 MHz) .....                                     | 30 |
| Figure S30. Enlarged fragment of $^1\text{H}$ NMR spectrum of <b>2</b> (DMSO- $d_6$ , 500 MHz) .....                                     | 31 |
| Figure S31. $^{13}\text{C}$ NMR spectrum of <b>2</b> (DMSO- $d_6$ , 126 MHz) .....                                                       | 32 |
| Figure S32. Enlarged fragment of $^{13}\text{C}$ NMR spectrum of <b>2</b> (DMSO- $d_6$ , 126 MHz) .....                                  | 33 |
| Figure S33. Enlarged fragment of $^{13}\text{C}$ NMR spectrum of <b>2</b> (DMSO- $d_6$ , 126 MHz) .....                                  | 34 |
| Figure S34. HMBC spectrum of <b>2</b> .....                                                                                              | 35 |
| Figure S35. $^1\text{H}$ NMR spectrum of <b>3</b> (DMSO- $d_6$ , 500 MHz) .....                                                          | 36 |
| Figure S36. Enlarged fragment of $^1\text{H}$ NMR spectrum of <b>3</b> (DMSO- $d_6$ , 500 MHz) .....                                     | 37 |
| Figure S37. Enlarged fragment of $^1\text{H}$ NMR spectrum of <b>3</b> (DMSO- $d_6$ , 500 MHz) .....                                     | 38 |
| Figure S38. Enlarged fragment of $^1\text{H}$ NMR spectrum of <b>3</b> (DMSO- $d_6$ , 500 MHz) .....                                     | 39 |
| Figure S39. $^{13}\text{C}$ NMR spectrum of <b>3</b> (DMSO- $d_6$ , 126 MHz) .....                                                       | 40 |
| Figure S40. Enlarged fragment of $^{13}\text{C}$ NMR spectrum of <b>3</b> (DMSO- $d_6$ , 126 MHz) .....                                  | 41 |
| Figure S41. Enlarged fragment of $^{13}\text{C}$ NMR spectrum of <b>3</b> (DMSO- $d_6$ , 126 MHz) .....                                  | 42 |
| Figure S42. HMBC spectrum of <b>3</b> .....                                                                                              | 43 |
| Figure S43. HPLC profile of compound <b>1</b> after purification using $\text{Na}_2\text{CO}_3$ .....                                    | 44 |
| Figure S44. Absorption spectrum of compound <b>4</b> (DAD) .....                                                                         | 44 |
| Figure S45. MS data of compound <b>4</b> .....                                                                                           | 44 |
| Figure S46. HRESIMS data of compound <b>4</b> .....                                                                                      | 45 |
| Figure S47. $^1\text{H}$ NMR spectrum of <b>4</b> (DMSO- $d_6$ , 500 MHz) .....                                                          | 46 |
| Figure S48. Enlarged fragment of $^1\text{H}$ NMR spectrum of <b>4</b> (DMSO- $d_6$ , 500 MHz) .....                                     | 47 |
| Figure S49. Enlarged fragment of $^1\text{H}$ NMR spectrum of <b>4</b> (DMSO- $d_6$ , 500 MHz) .....                                     | 48 |
| Figure S50. Enlarged fragment of $^1\text{H}$ NMR spectrum of <b>4</b> (DMSO- $d_6$ , 500 MHz) .....                                     | 49 |
| Figure S51. $^{13}\text{C}$ NMR spectrum of <b>4</b> (DMSO- $d_6$ , 126 MHz) .....                                                       | 50 |
| Figure S52. Enlarged fragment of $^{13}\text{C}$ NMR spectrum of <b>4</b> (DMSO- $d_6$ , 126 MHz) .....                                  | 51 |
| Figure S53. Enlarged fragment of $^{13}\text{C}$ NMR spectrum of <b>4</b> (DMSO- $d_6$ , 126 MHz) .....                                  | 52 |
| Figure S54. HMBC spectrum of <b>4</b> (DMSO- $d_6$ , 126 MHz) .....                                                                      | 53 |
| Investigation of interaction of compound <b>1</b> with recombinant cytochromes P450 using SPR analysis .....                             | 54 |
| Table S4. The amount of the ligand immobilized on the chip .....                                                                         | 54 |
| Table S5. Parameters of interaction of compound <b>1</b> with cytochromes of various organisms immobilized on the CM5 optical chip. .... | 55 |

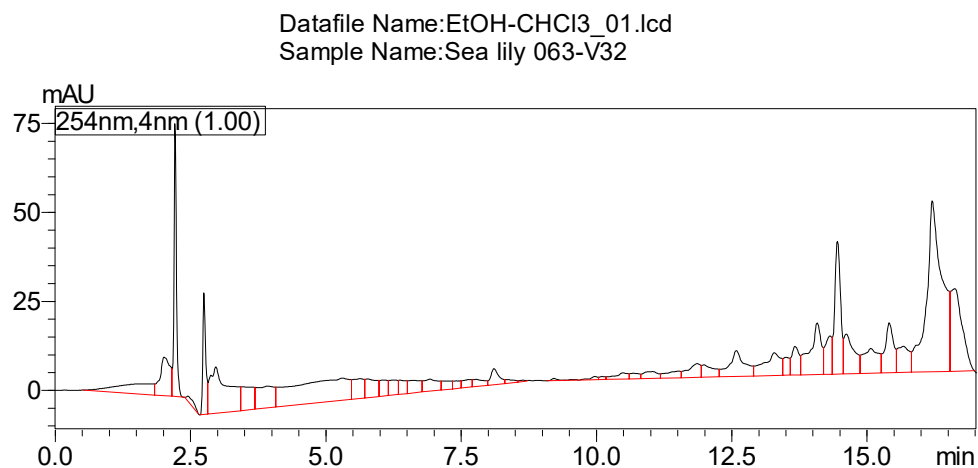

**Figure S1.** HPLC profile of ethanolic extract of *P. gracilis*, no acid was added. HPLC system of H<sub>2</sub>O (A): MeCN (B) with the addition of 0.2% AcOH first was used not as described in manuscript, but as follows: 0–6 min, 10–40% (B); 6–11 min, 40–100% (B); 11–12 min, 100% (B), 12–13 min, 100–10% (B); and 13–17 min, 10% (B).

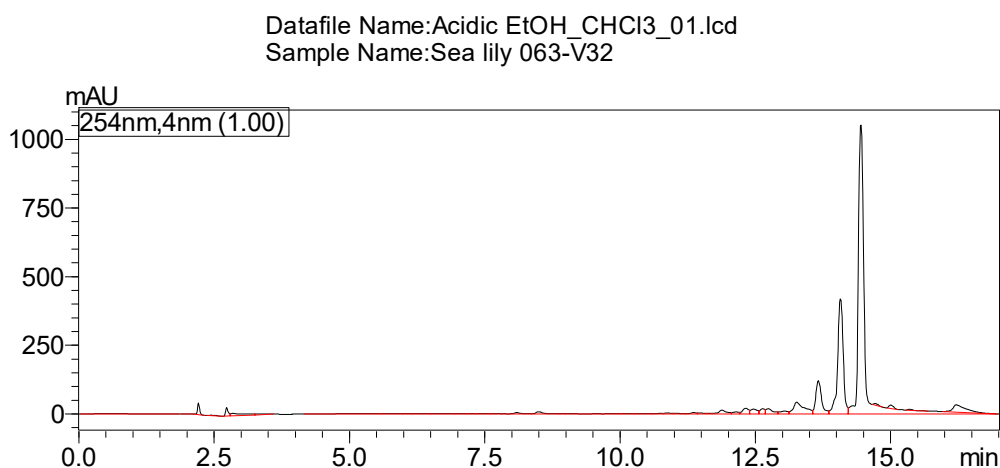

**Figure S2.** HPLC profile of acidified ethanolic extract of *P. gracilis*. HPLC system of H<sub>2</sub>O (A): MeCN (B) with the addition of 0.2% AcOH: 0–6 min, 10–40% (B); 6–11 min, 40–100% (B); 11–12 min, 100% (B), 12–13 min, 100–10% (B); and 13–17 min, 10% (B).



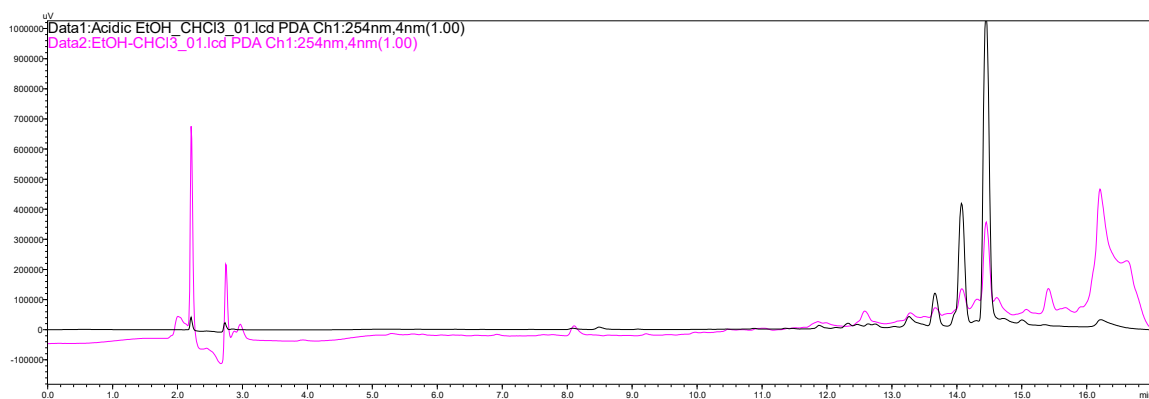

**Figure S3.** Data comparison of HPLC profiles of an ethanolic and of acidified ethanolic extract of *P. gracilis*. Coincidence of compounds **1-3** in both extracts was confirmed by coincidence of their HPLC-DAD-MS parameters.

Datafile Name:Acidic EtOH-CHCl3\_02.lcd  
Sample Name:063-032

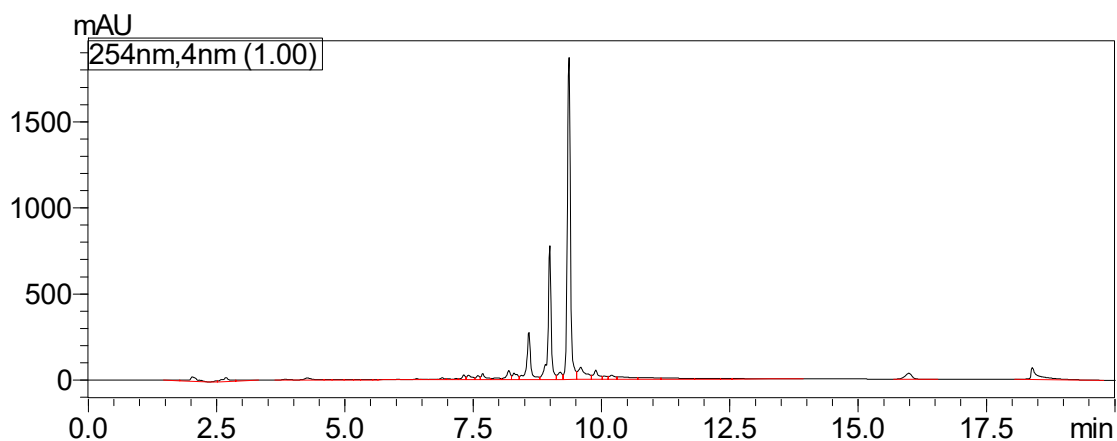

**Figure S4.** HPLC profile of the CHCl<sub>3</sub> fraction of the acidified ethanolic extract of *P. gracilis*

Datafile Name:Acidic EtOH-2-EtOAc\_02.lcd  
Sample Name:063-032

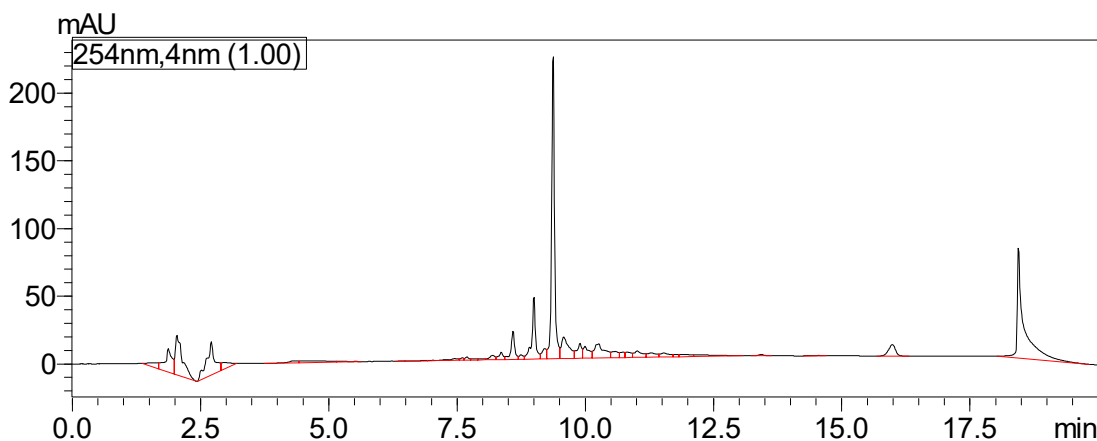

**Figure S5.** HPLC profile of the EtOAc fraction of the acidified ethanolic extract of *P. gracilis*

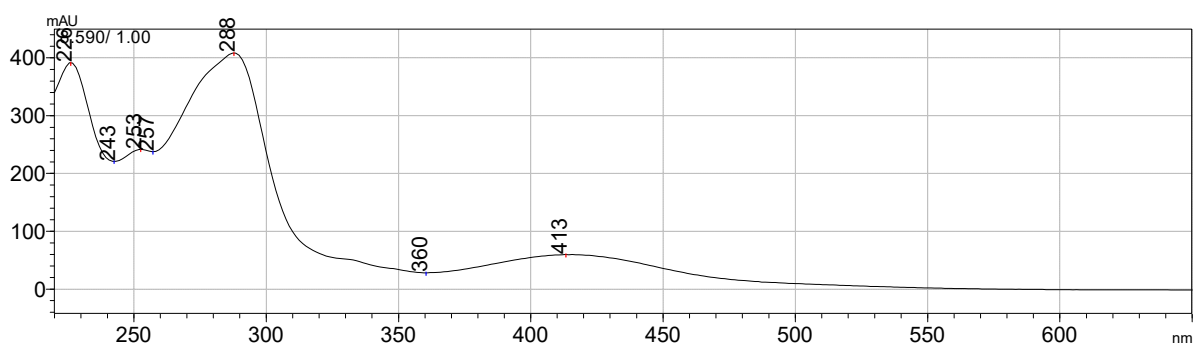

**Figure S6.** Absorption spectrum of 3 (DAD)

Scan(E-) Ret. Time : [8.667] Scan# : [1041]

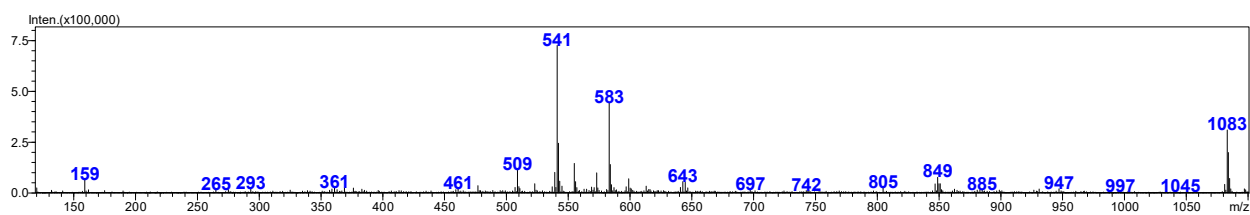

Scan(E+) Ret. Time : [8.675] Scan# : [1042]

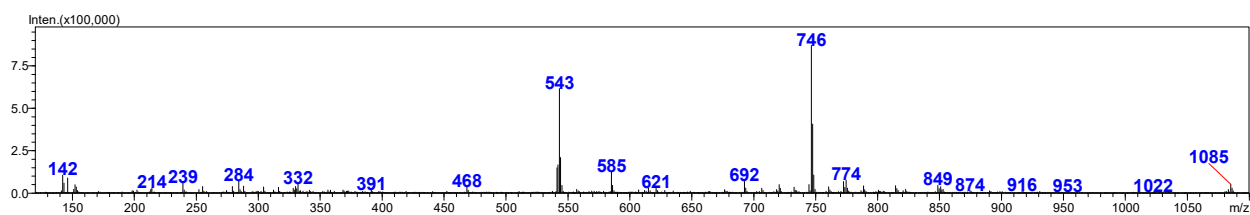

**Figure S7.** MS data of 3

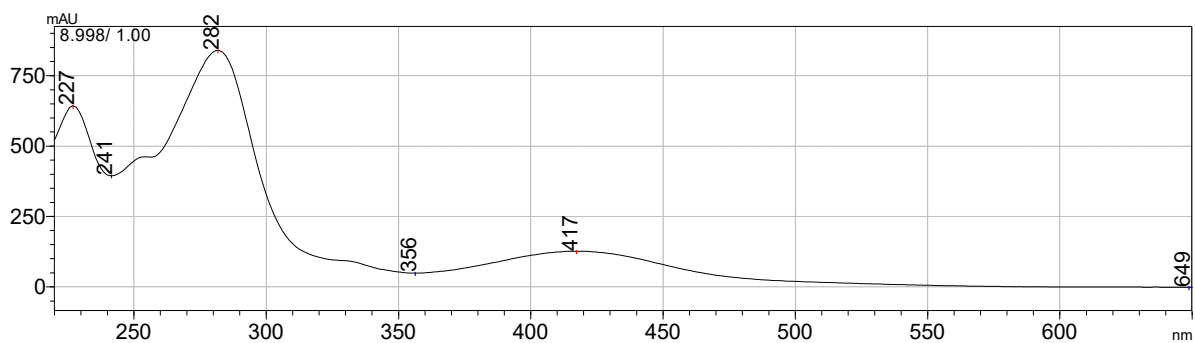

**Figure S8.** Absorption spectrum of 2 (DAD)

Scan(E-) Ret. Time : [9.033] Scan# : [1085]

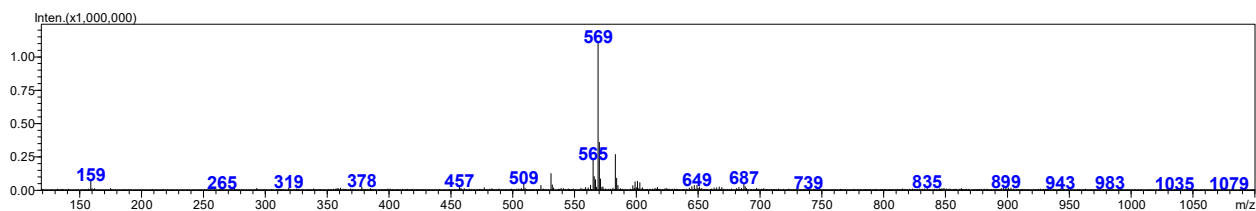

Scan(E+) Ret. Time : [9.041] Scan# : [1086]

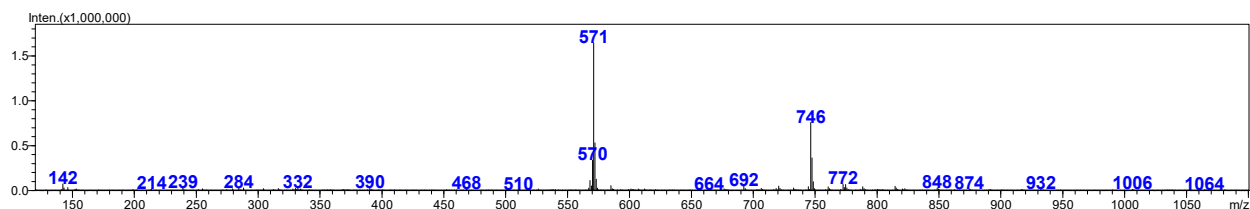

Figure S9. MS data of 2

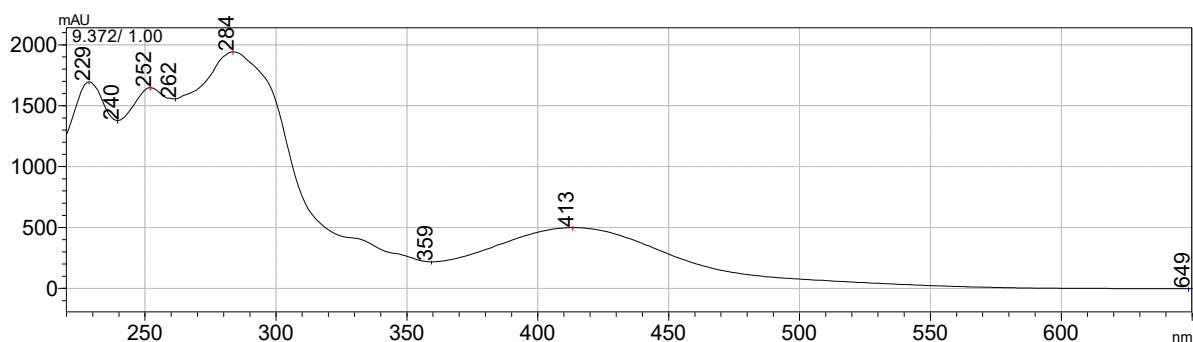

Figure S10. Absorption spectrum of 1 (DAD)

Scan(E-) Ret. Time : [9.417] Scan# : [1131]

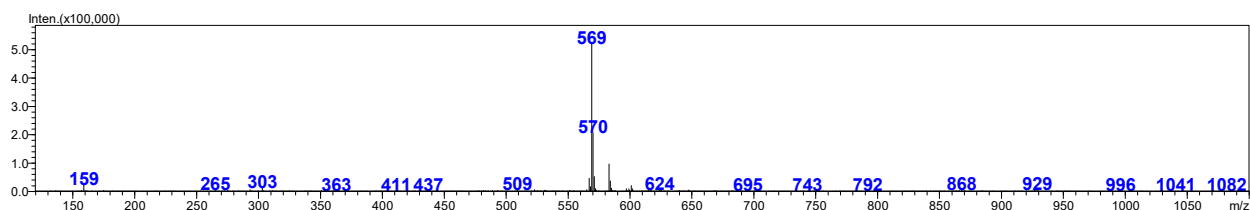

Scan(E+) Ret. Time : [9.425] Scan# : [1132]

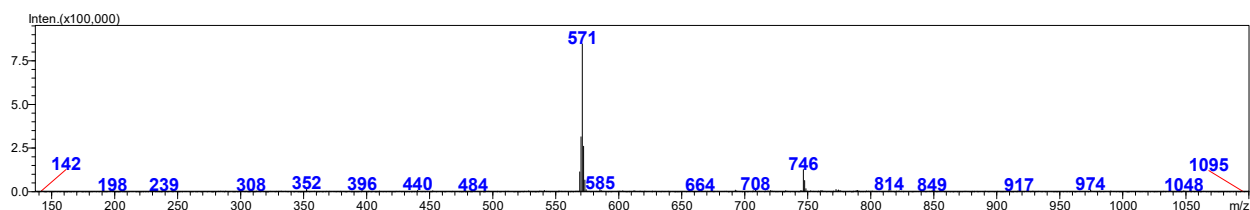

Figure S11. MS data of 1

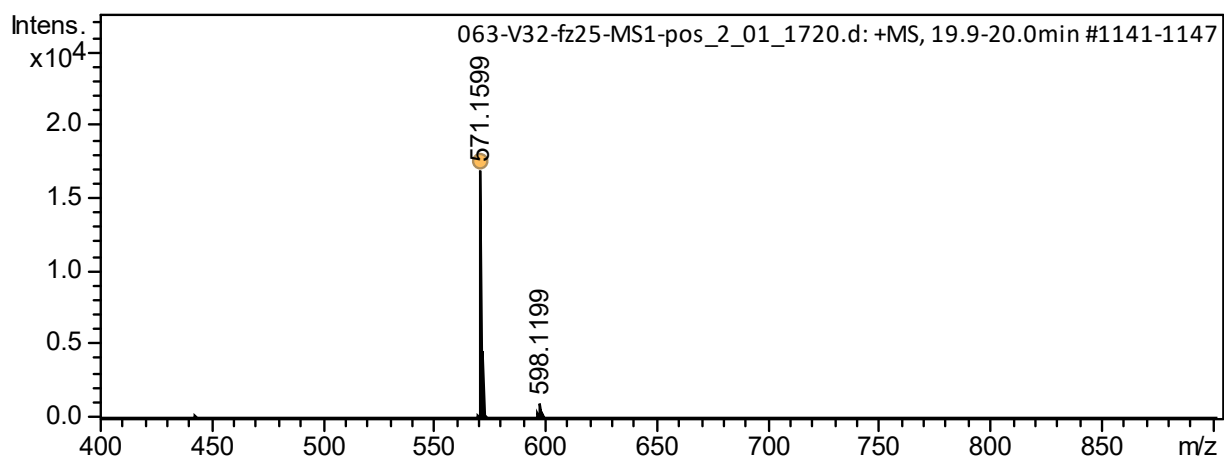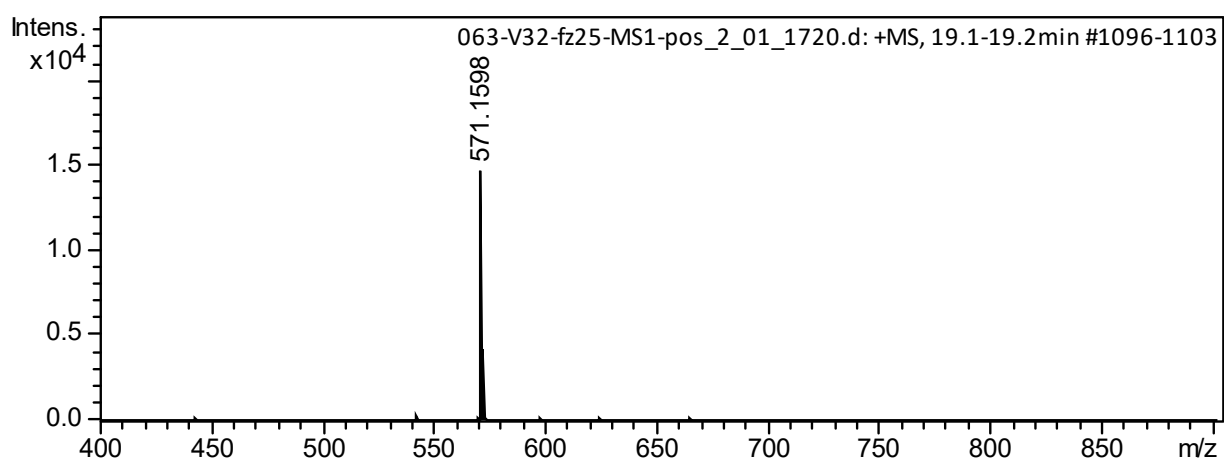

| Meas.<br>m/z | Ion Formula                                     | m/z      | err<br>[ppm] | mSigma | Score | rdB |
|--------------|-------------------------------------------------|----------|--------------|--------|-------|-----|
| 571,1598     | C <sub>32</sub> H <sub>27</sub> O <sub>10</sub> | 571,1599 | 0,1          | 34,2   | 100   | 20  |

**Figure S12.** HRESIMS data of **1** and **2**

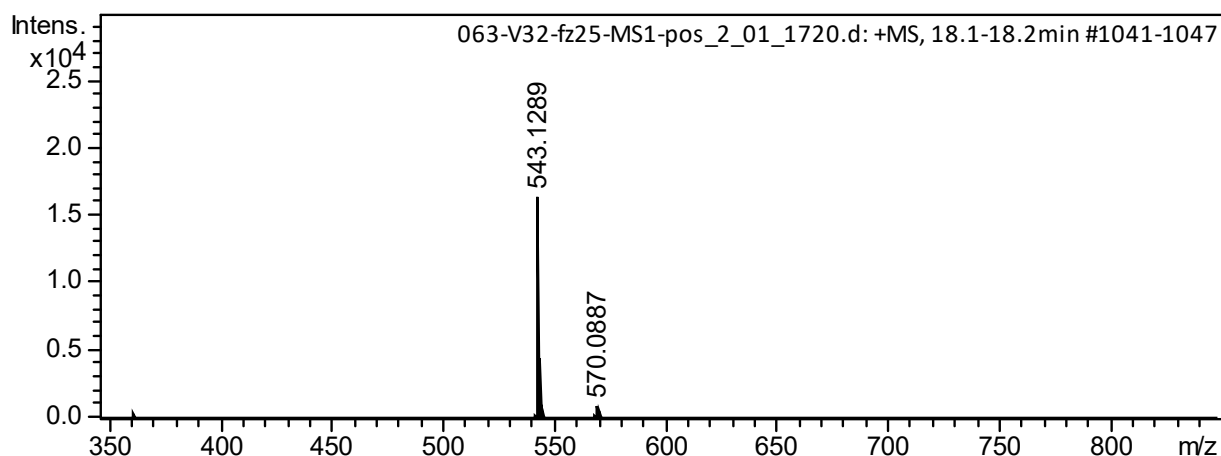

| Meas.<br>m/z | Ion Formula      | m/z             | err<br>[ppm] | mSigma      | Score      | rdB       |
|--------------|------------------|-----------------|--------------|-------------|------------|-----------|
| 543,1289     | C18H27N2O17      | 543,1304        | 2,9          | 26,7        | 61,16      | 7         |
|              | <b>C30H23O10</b> | <b>543,1286</b> | <b>-0,5</b>  | <b>35,5</b> | <b>100</b> | <b>20</b> |
|              | C31H19N4O6       | 543,1299        | 1,9          | 46,6        | 49,92      | 25        |

**Figure S13.** HRESIMS data of **3**

### HR-ESI-MS Analysis

Chromatographic separation was carried out on a Bruker Elute UHPLC chromatograph (Bruker Daltonics, Bremen, Germany) in gradient elution mode. The separation was carried out on a Agilent InfinityLab Poroshell 120 SB-C18 column (2,1 × 150 mm, 1.9 µm particle size, Agilent Technologies, USA). The column was thermostated at 40 °C. The mobile phase used was a 0.1% aqueous solution of formic acid (A) and a 0.1% solution of formic acid in acetonitrile (B) at a flow rate of 0.35 mL/min. The gradient was as follows: 0 min, 3% (B); 0–3 min, 5% (B); 3–18 min, 70% (B); 18–21 min, 100% (B); 21–25 min, 100% (B); 25–28 min, 3% (B). The injection volume was 3 µL in the mode of partial filling of the autosampler loop.

Mass spectrometric detection was carried out on a Bruker Maxis Impact II instrument (Bruker Daltonics, Bremen, Germany) with an operating resolution of 20000, equipped with an electrospray ionization source in positive ion detection mode in the range of 50–2000 Da. The operating parameters of the ionization source were as follows: capillary voltage – 4500 V, nitrogen was used as a drying gas at a flow of 6 L/min, a pressure of 2.5 bar and a temperature of 200 °C. The voltage on the first and second ion funnel was 300 V, the voltage on the quadrupole and collision cell lenses was 5 and 10 V. MS/MS spectra in the collision-induced dissociation mode were obtained automatically, using nitrogen as the collisional activation gas. To obtain MS/MS spectra, peaks in the range of 500–600 m/z with an intensity greater than 800 p.u. were selected. The mass spectrometer was calibrated using a standard calibration solution (ESI-L Low Concentration Tuning Mix, Agilent Technologies, USA).

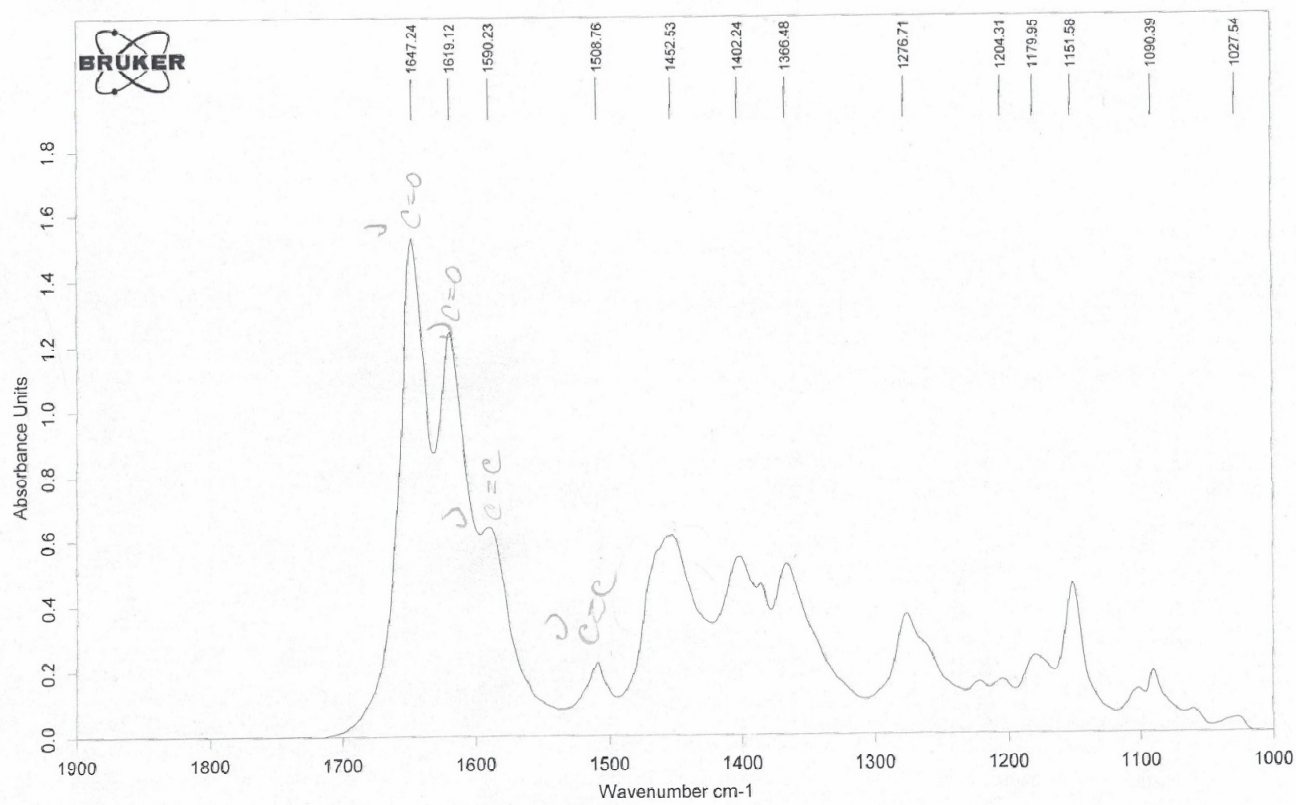

D:\OPUS\MEAS\Year-2023\03-23\05\Sample 570-2.0

Sample 570-2 [Vasilyeva]

Solution in  $\text{CDCl}_3$ ,  $\text{CaF}_2=1\text{mm}$ , Scan 120

2023/03/01

Page 1/1

**Figure S14.** IR spectrum of **1** ( $1900\text{-}1000\text{ cm}^{-1}$ )

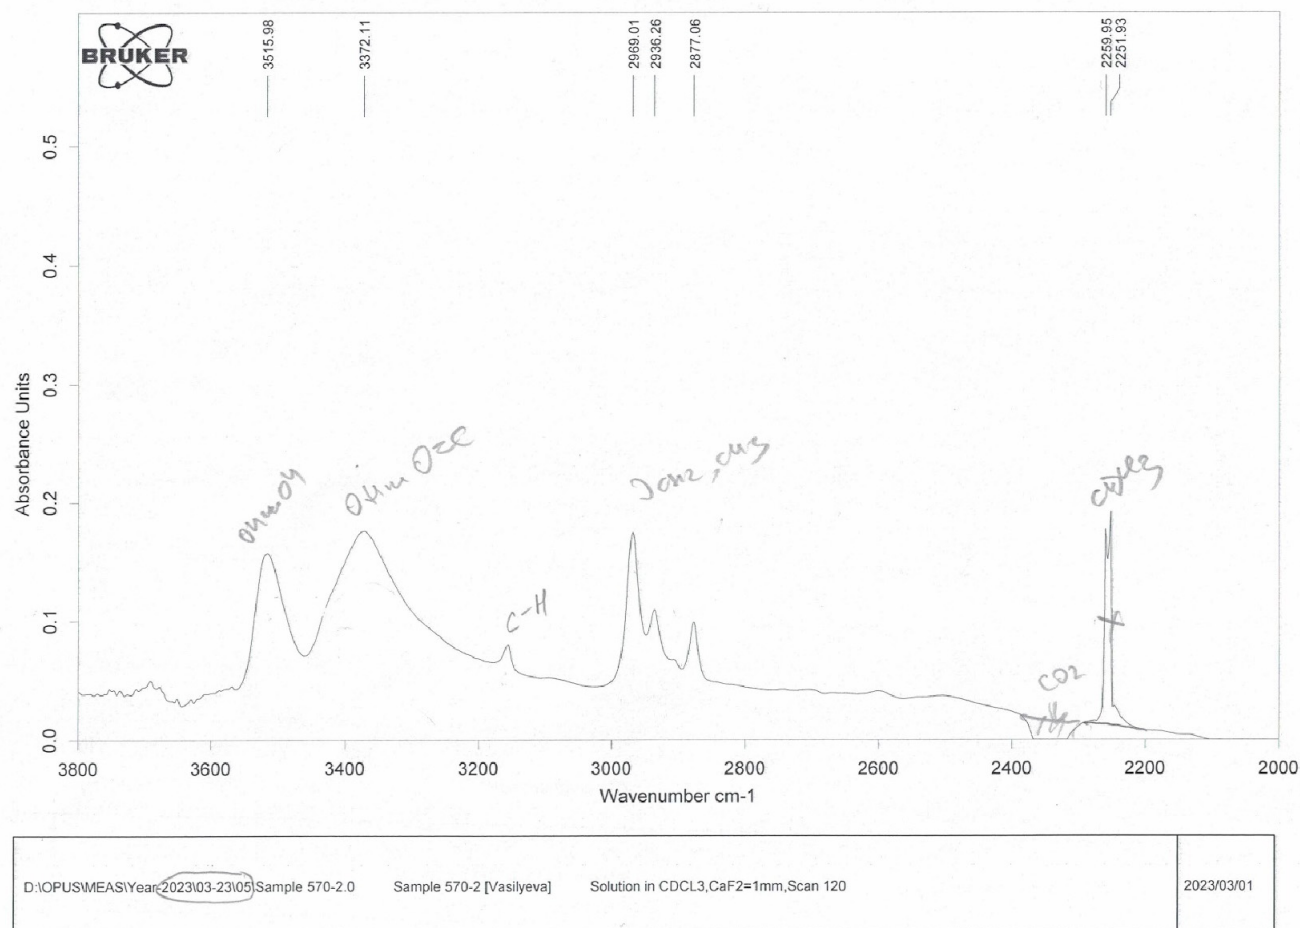

Page 1/1

**Figure S15.** IR spectrum of **1** (3800-2000  $\text{cm}^{-1}$ )

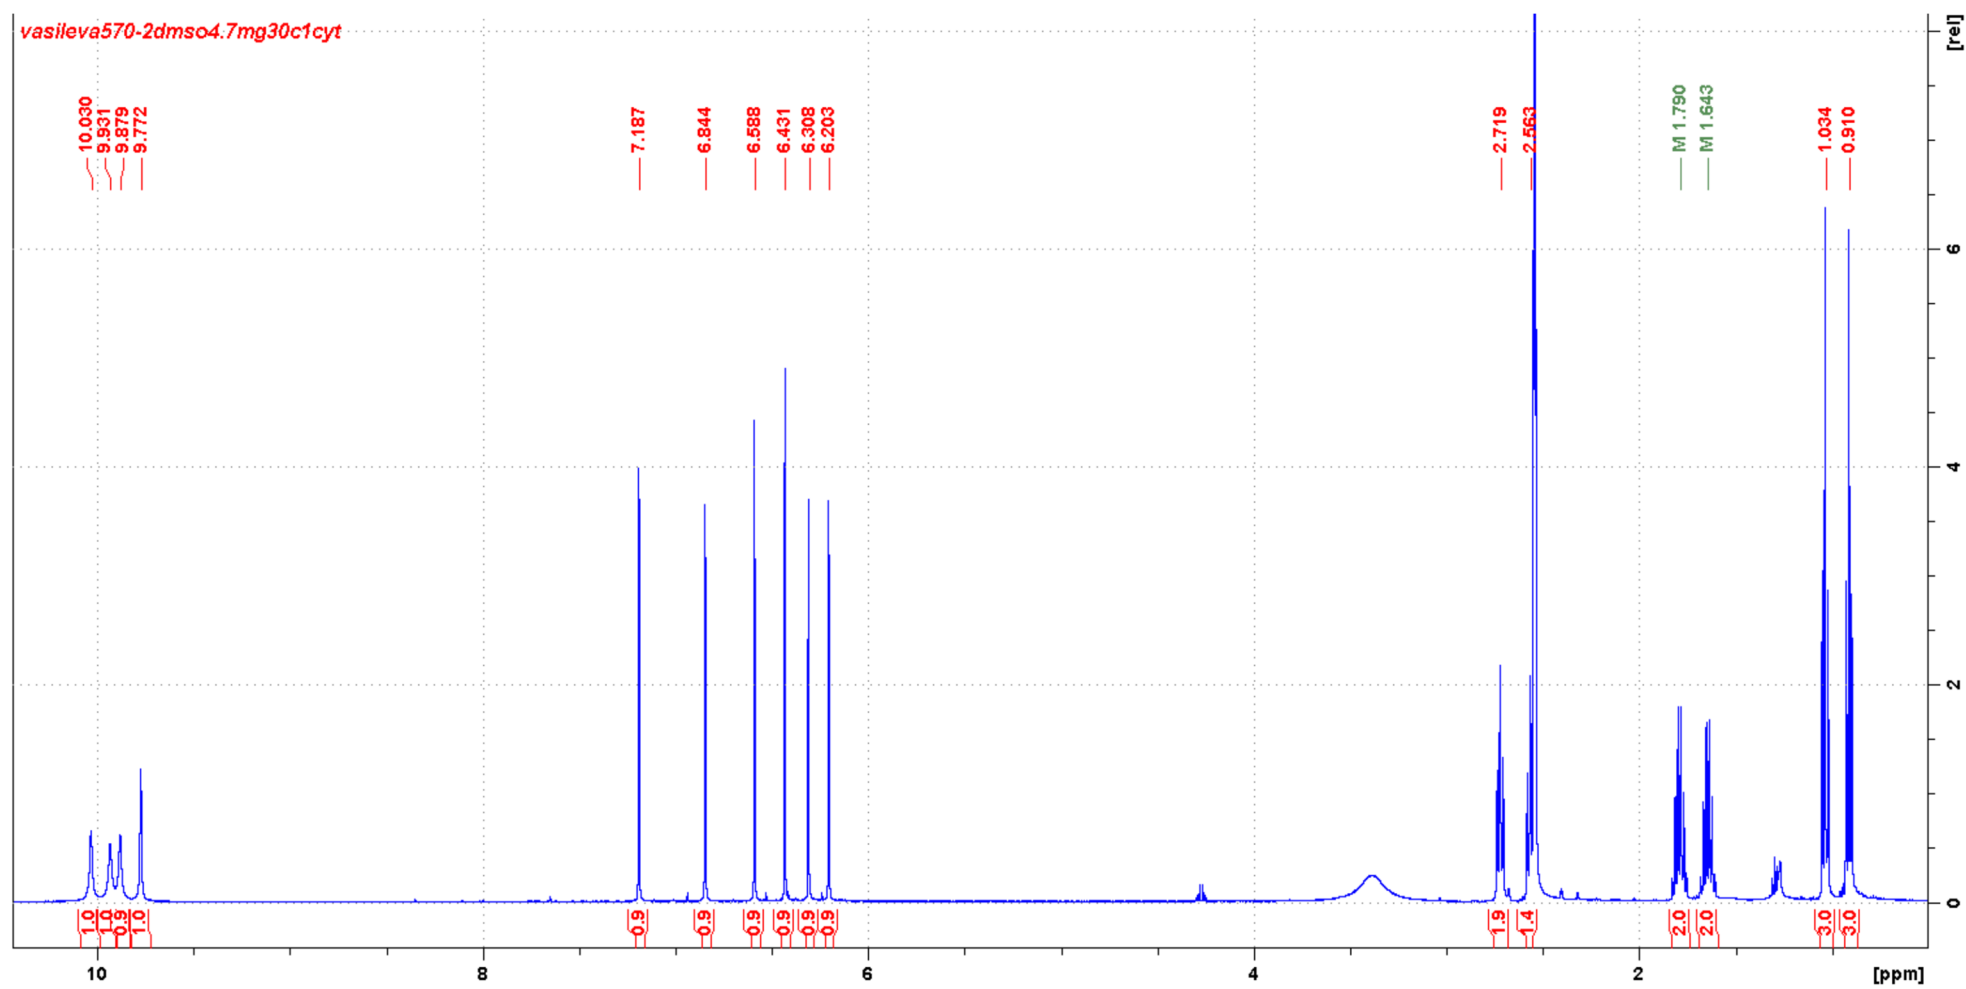

Figure S16.  $^1\text{H}$  NMR spectrum of **1** ( $\text{DMSO}-d_6$ , 500 MHz)



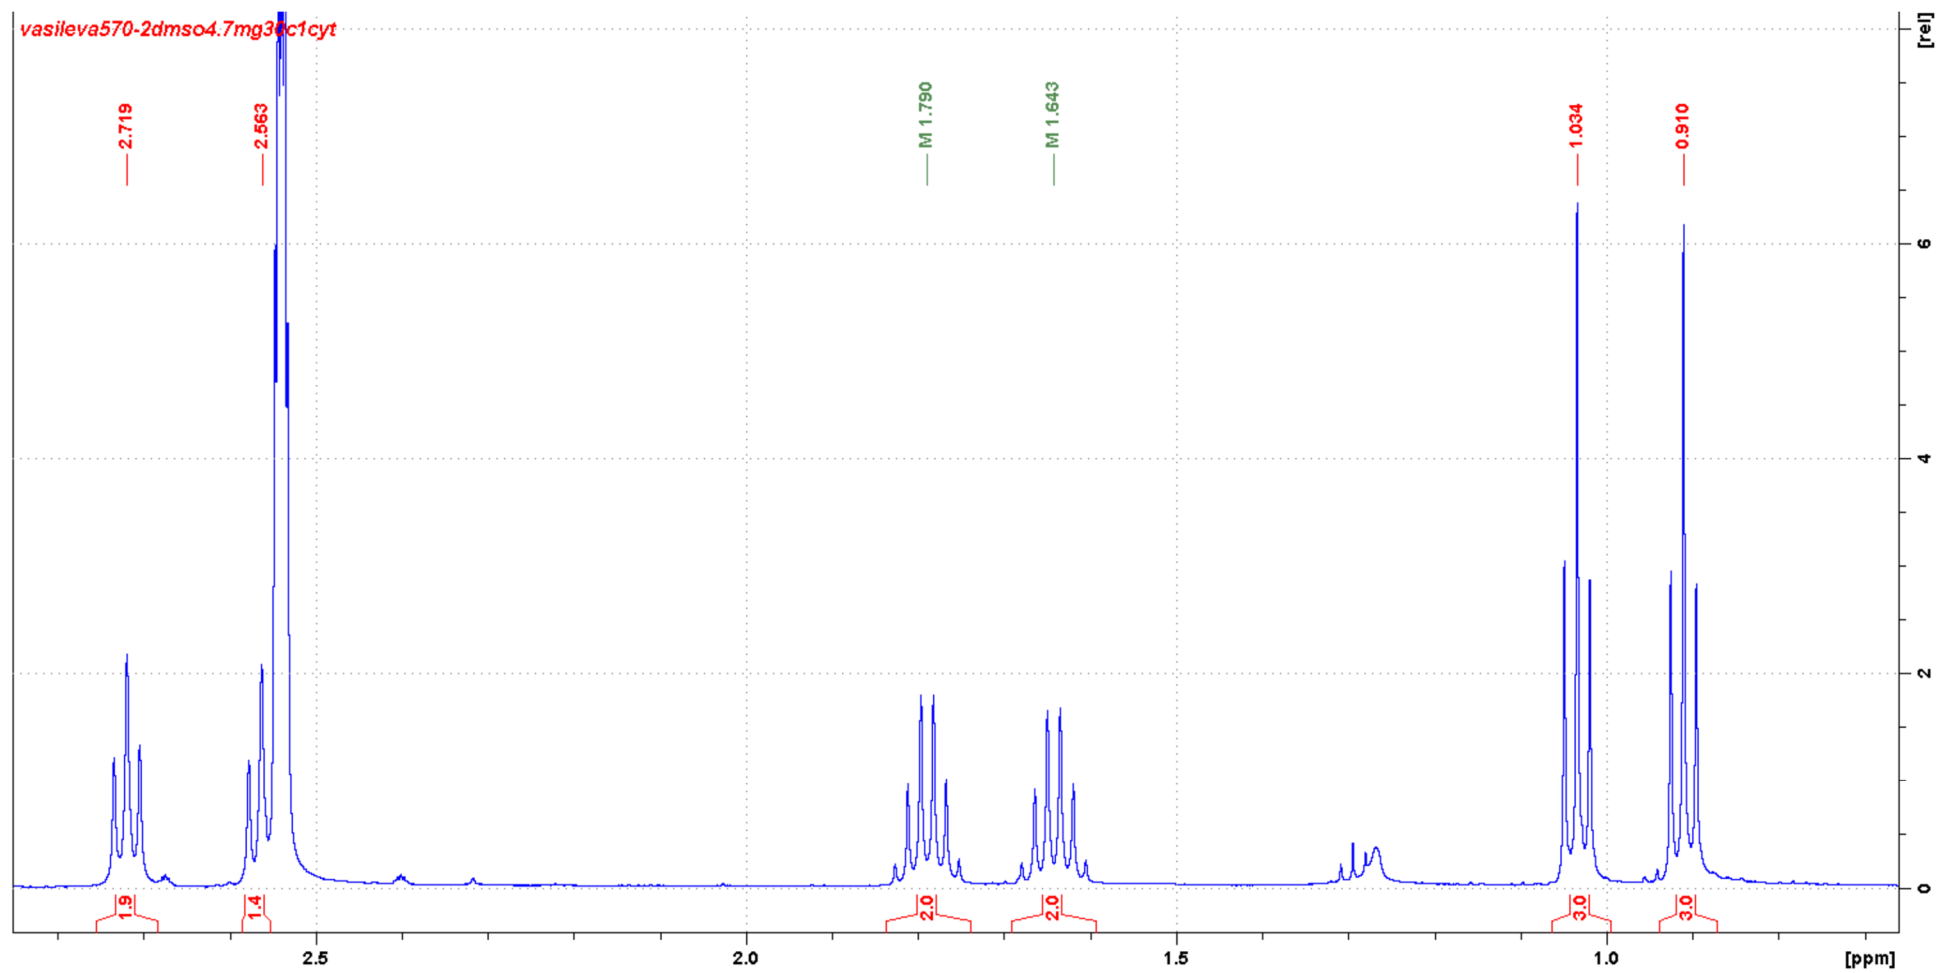

Figure S17. Enlarged fragment of  $^1\text{H}$  NMR spectrum of **1** ( $\text{DMSO-}d_6$ , 500 MHz)

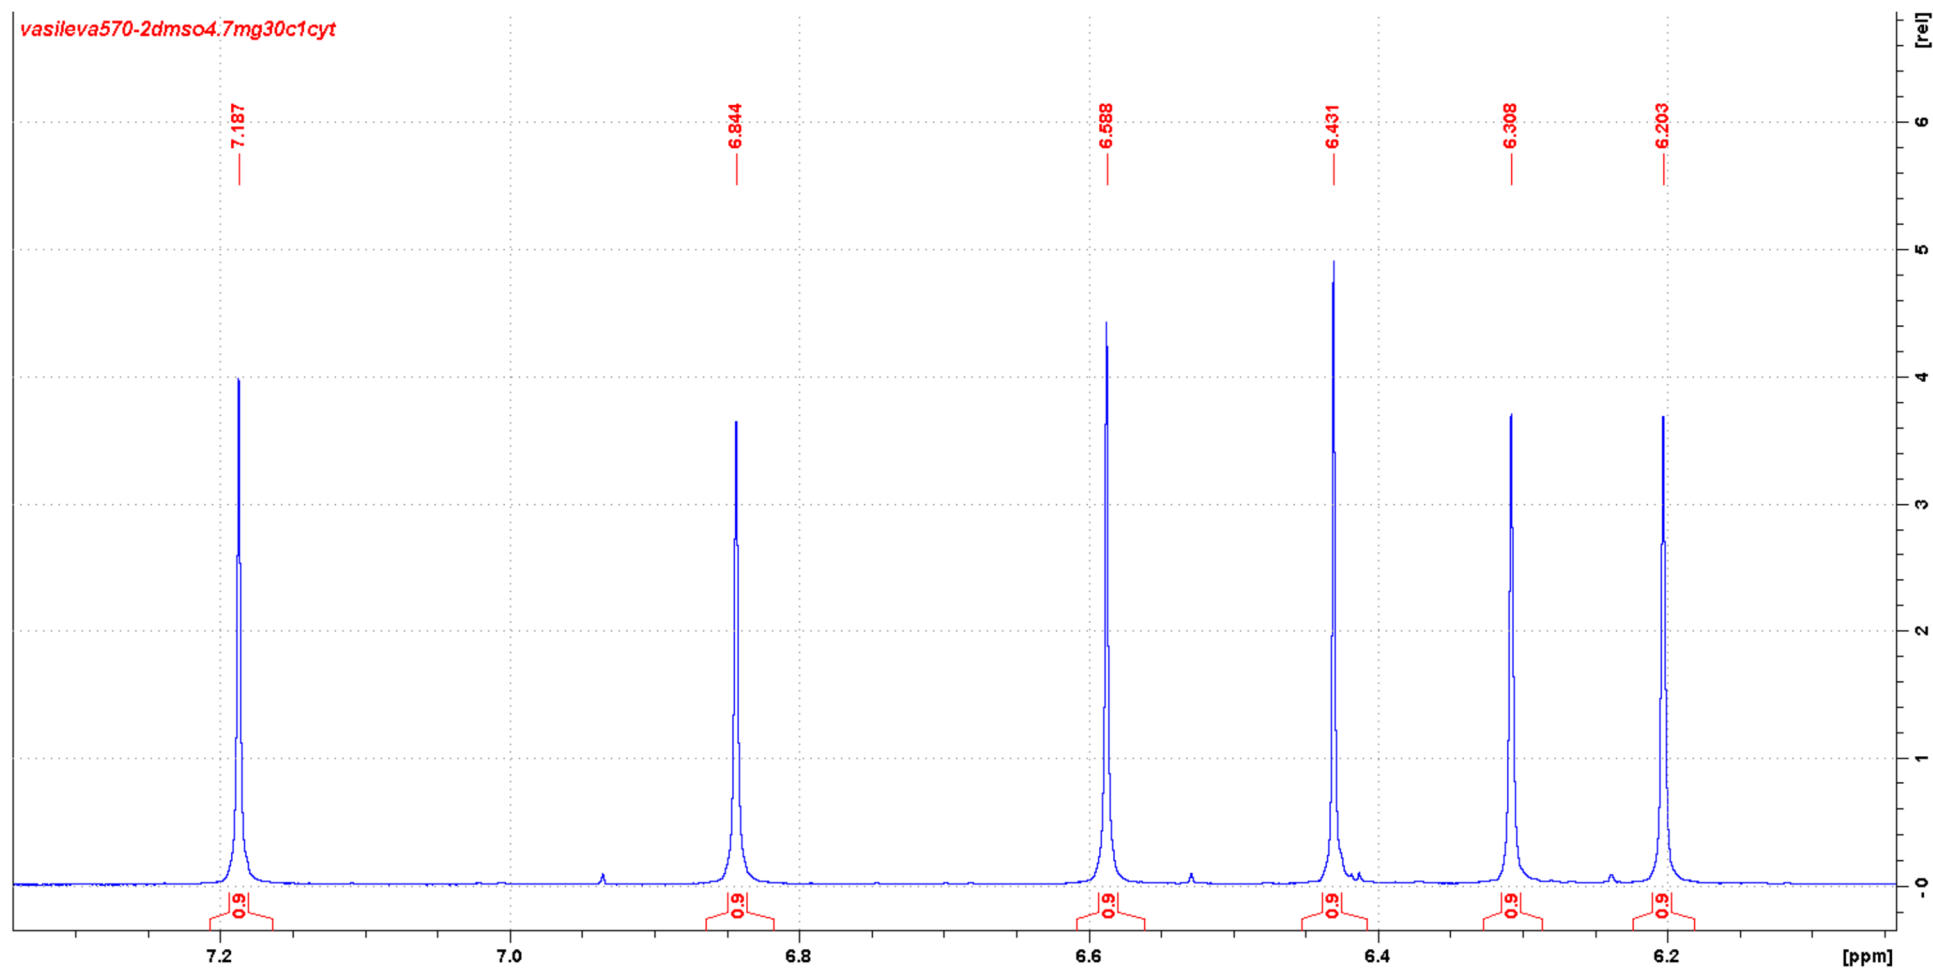

Figure S18. Enlarged fragment of  $^1\text{H}$  NMR spectrum of **1** ( $\text{DMSO-}d_6$ , 500 MHz)

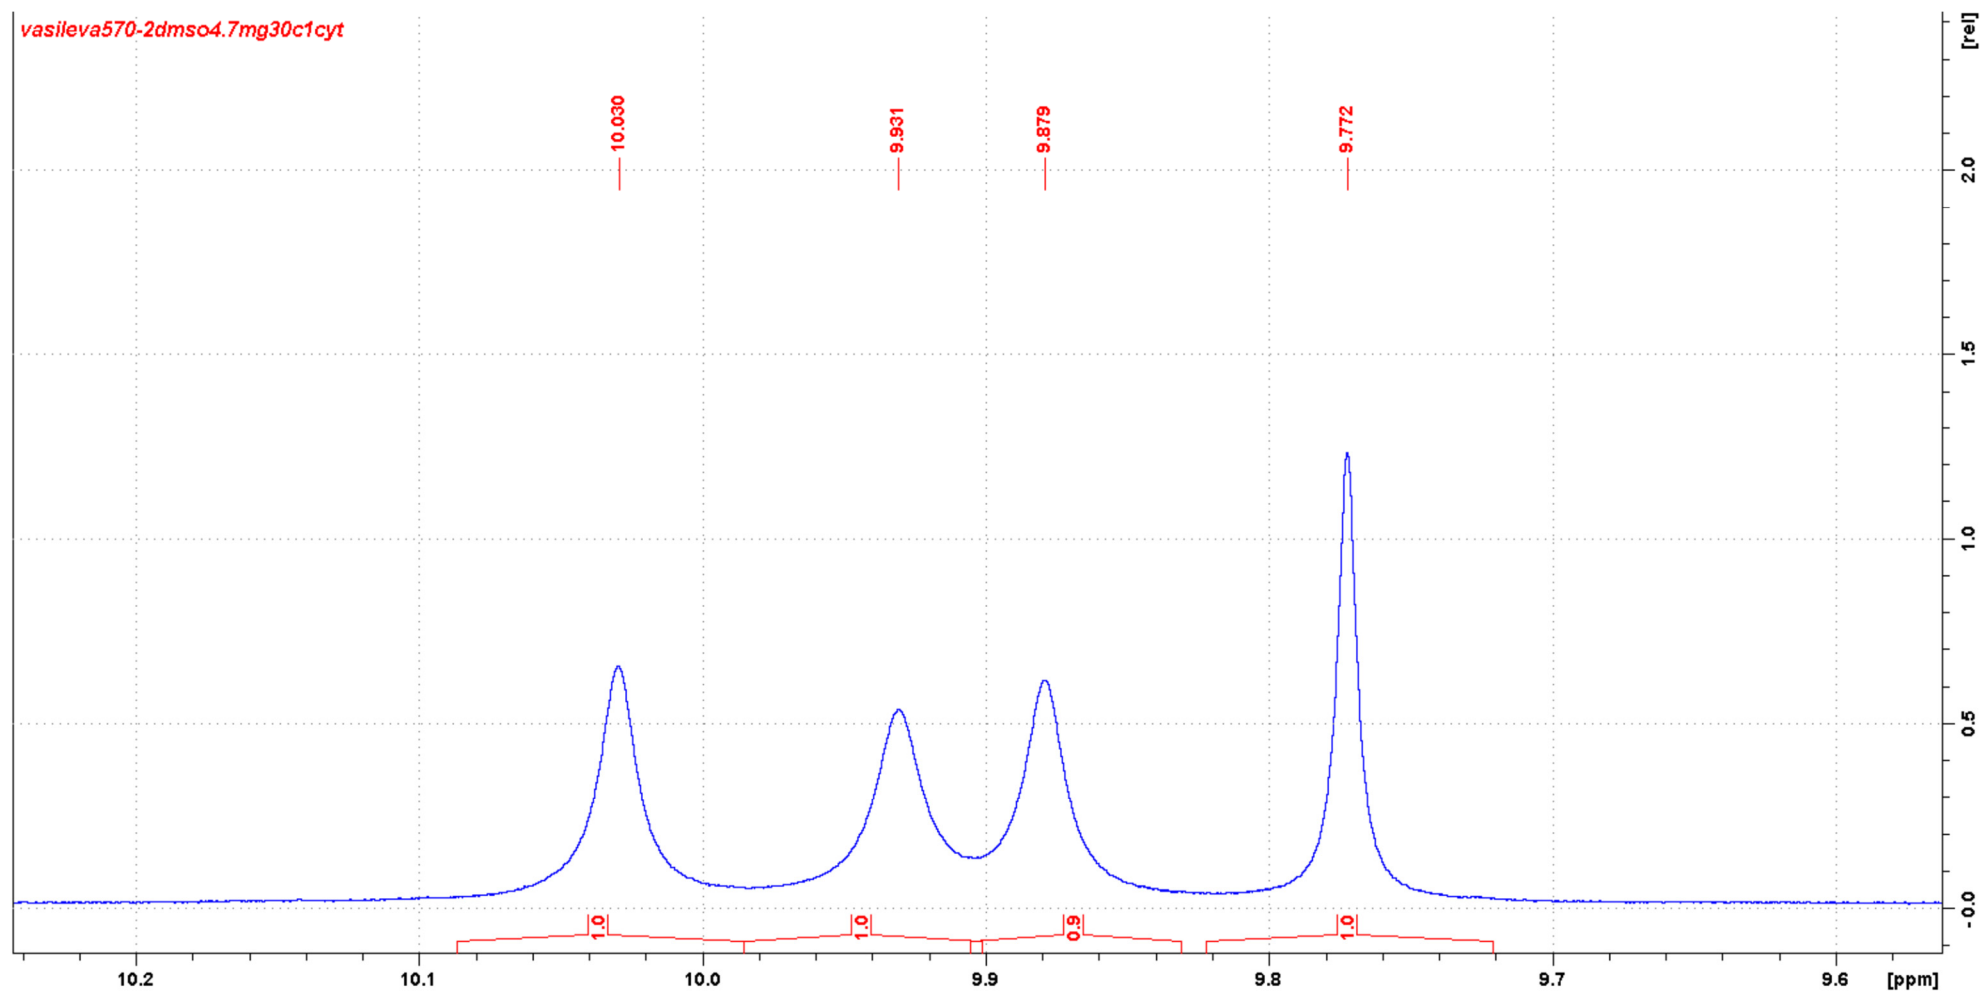

**Figure S19.** Enlarged fragment of  $^1\text{H}$  NMR spectrum of **1** ( $\text{DMSO}-d_6$ , 500 MHz)

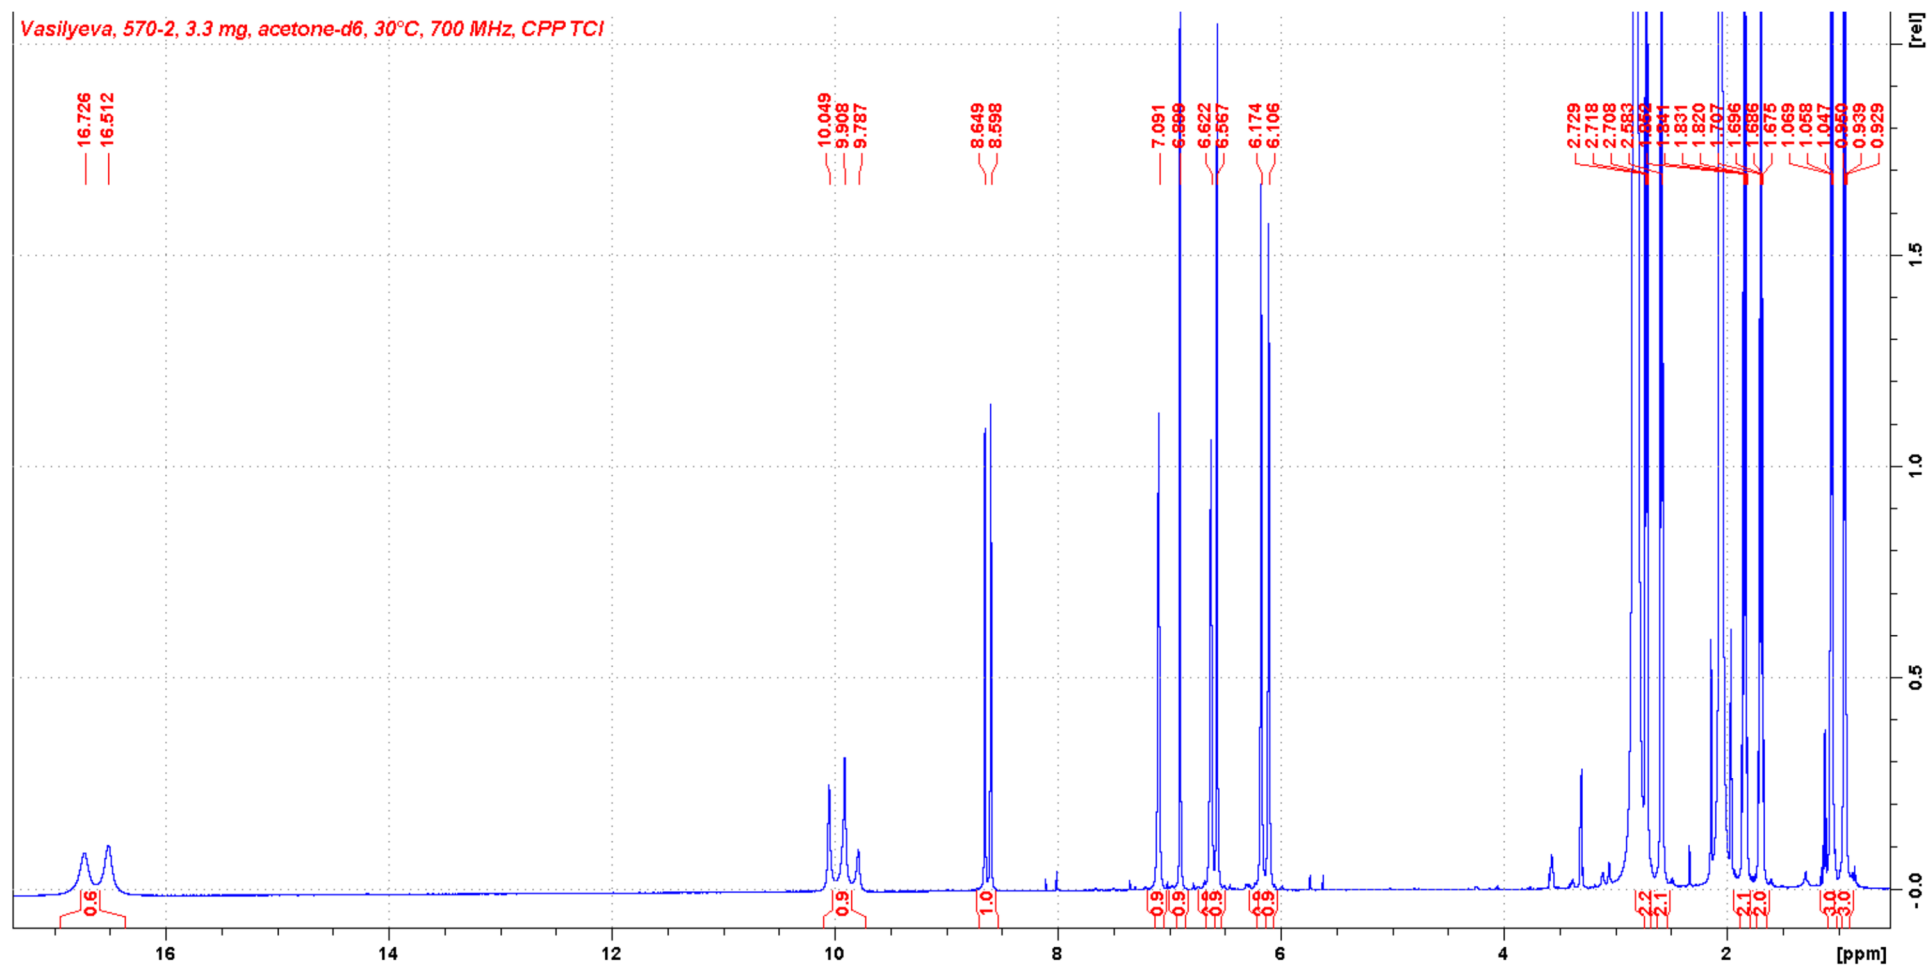

Figure S20. <sup>1</sup>H NMR spectrum of **1** (acetone-*d*<sub>6</sub>, 700 MHz)

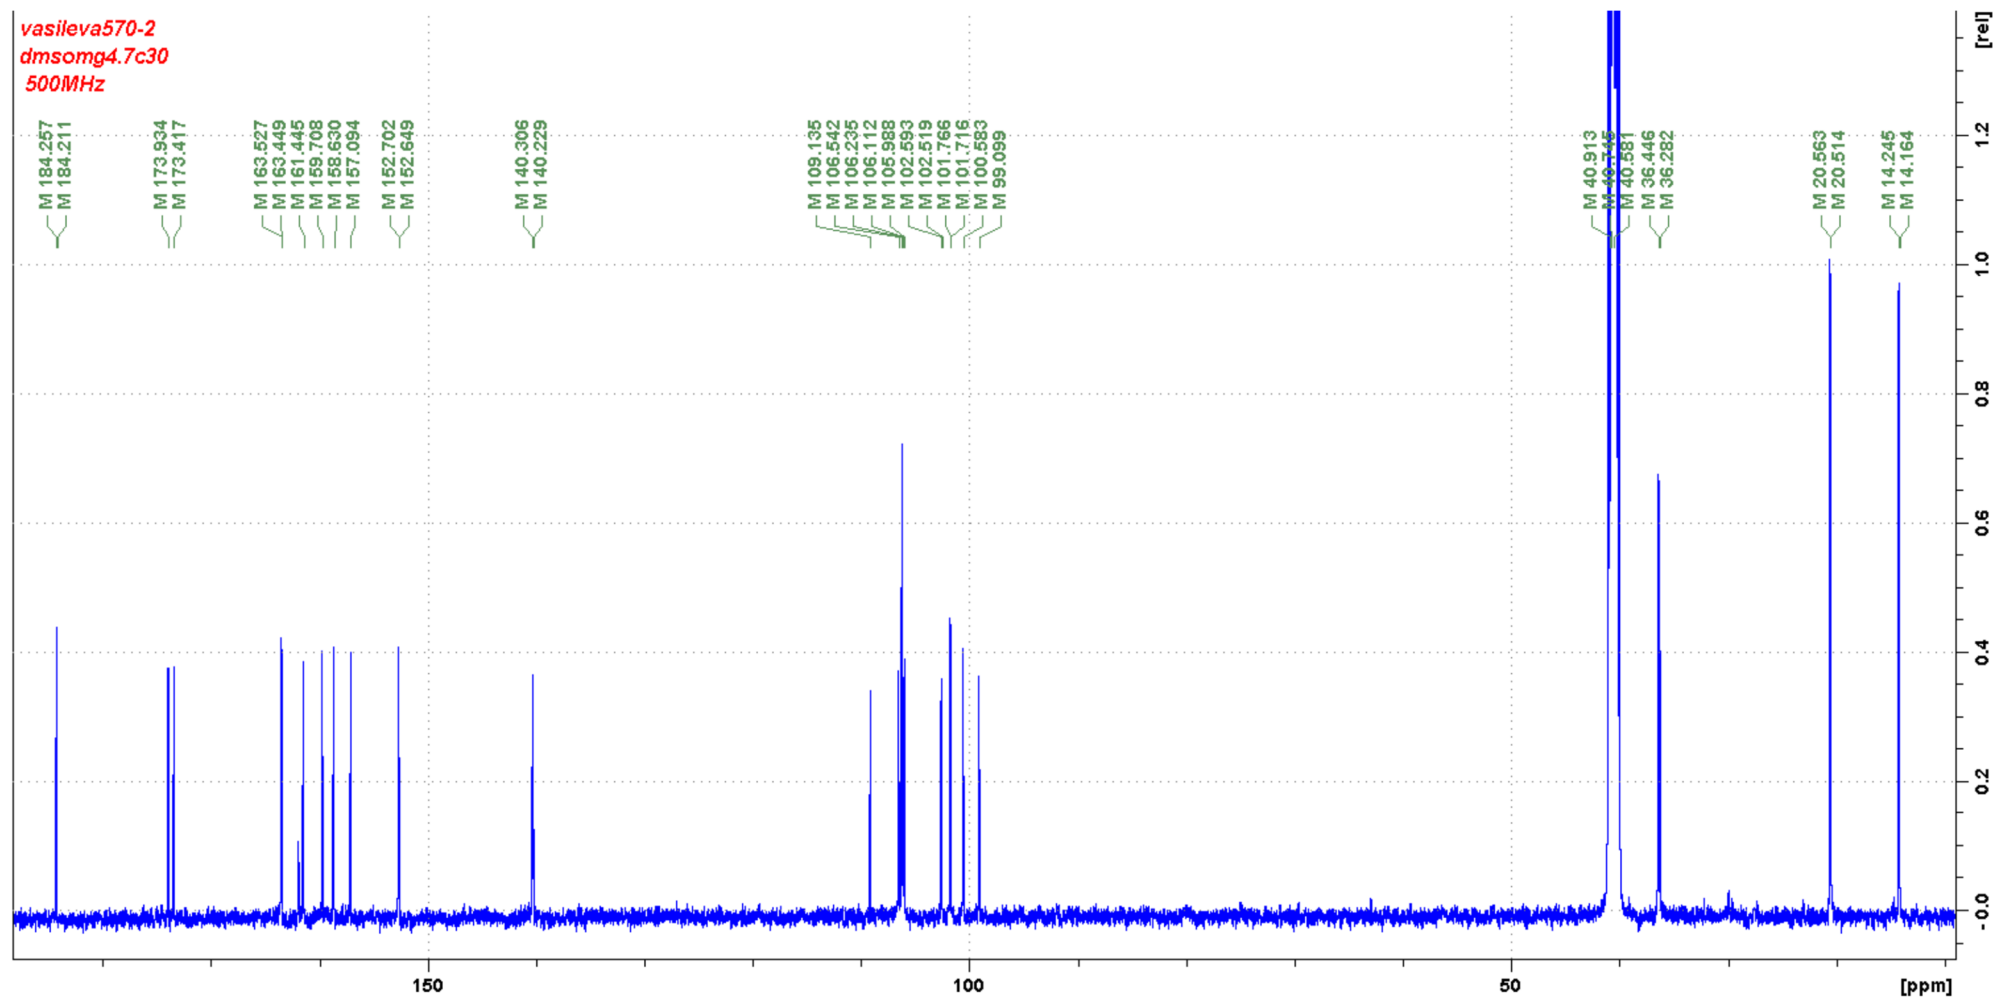

Figure S21.  $^{13}\text{C}$  NMR spectrum of **1** (DMSO- $d_6$ , 126 MHz)

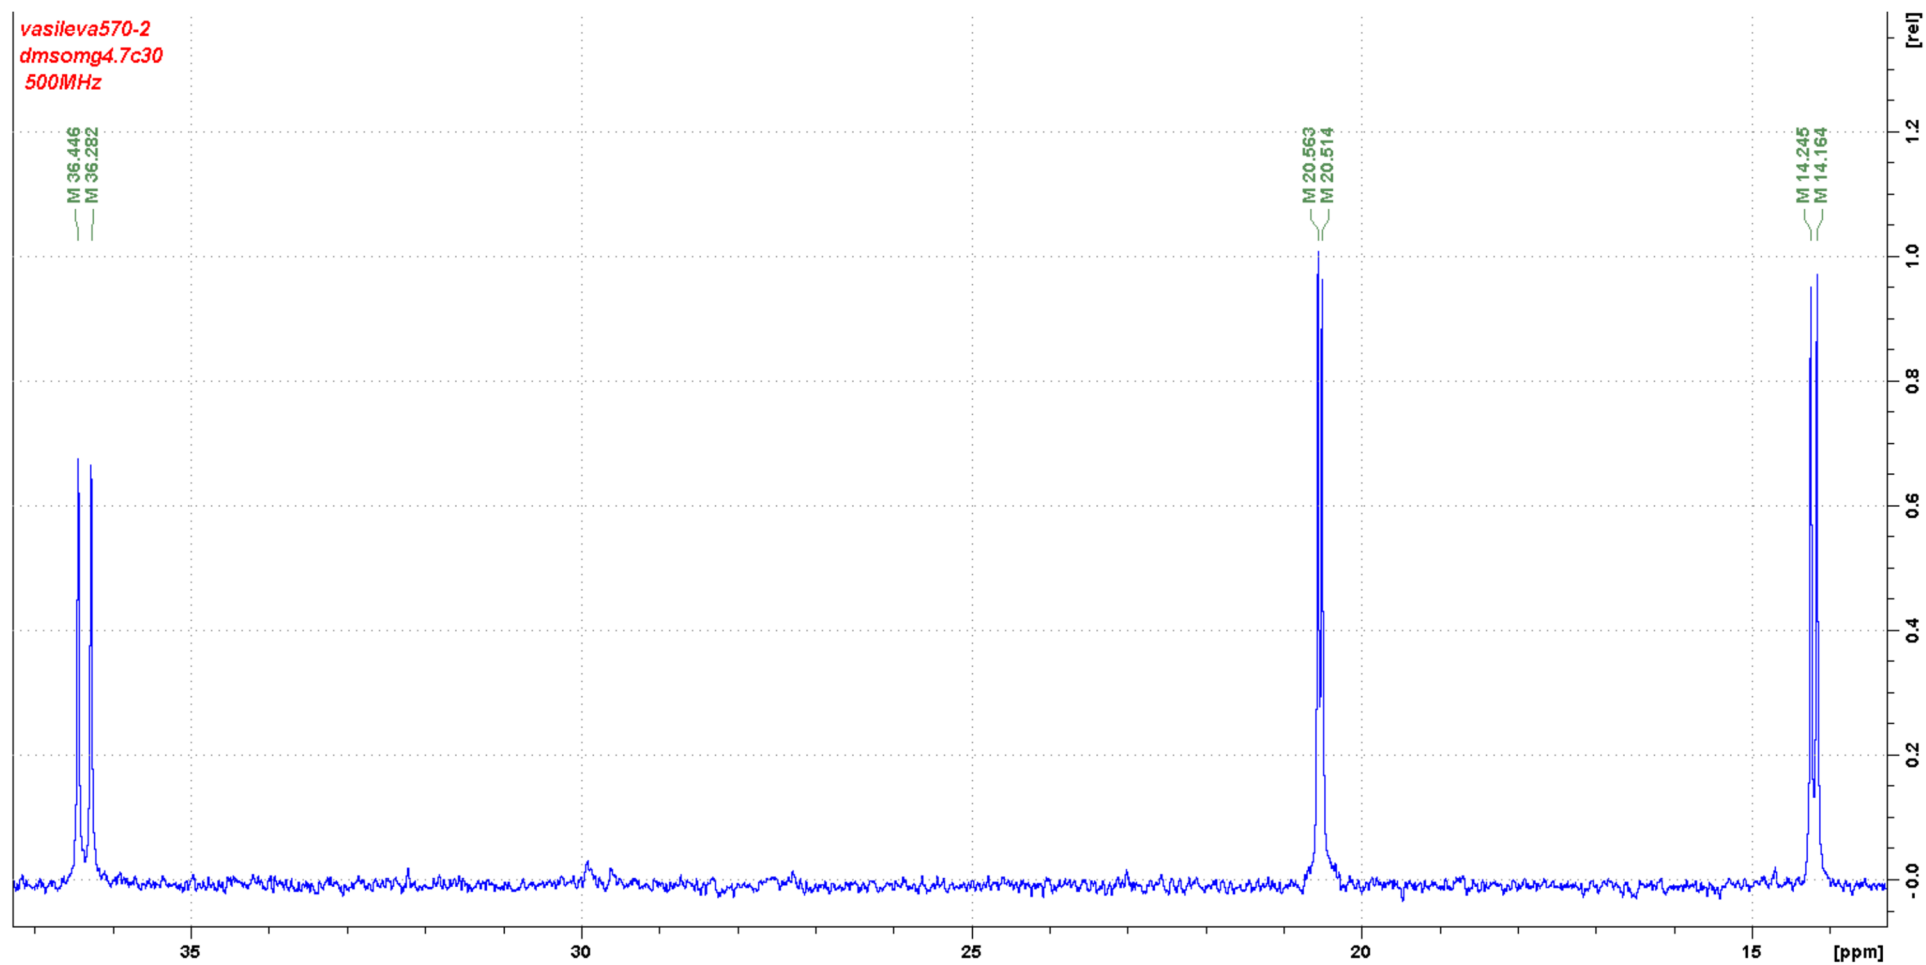

Figure S22. Enlarged fragment of  $^{13}\text{C}$  NMR spectrum of **1** (DMSO- $d_6$ , 126 MHz)

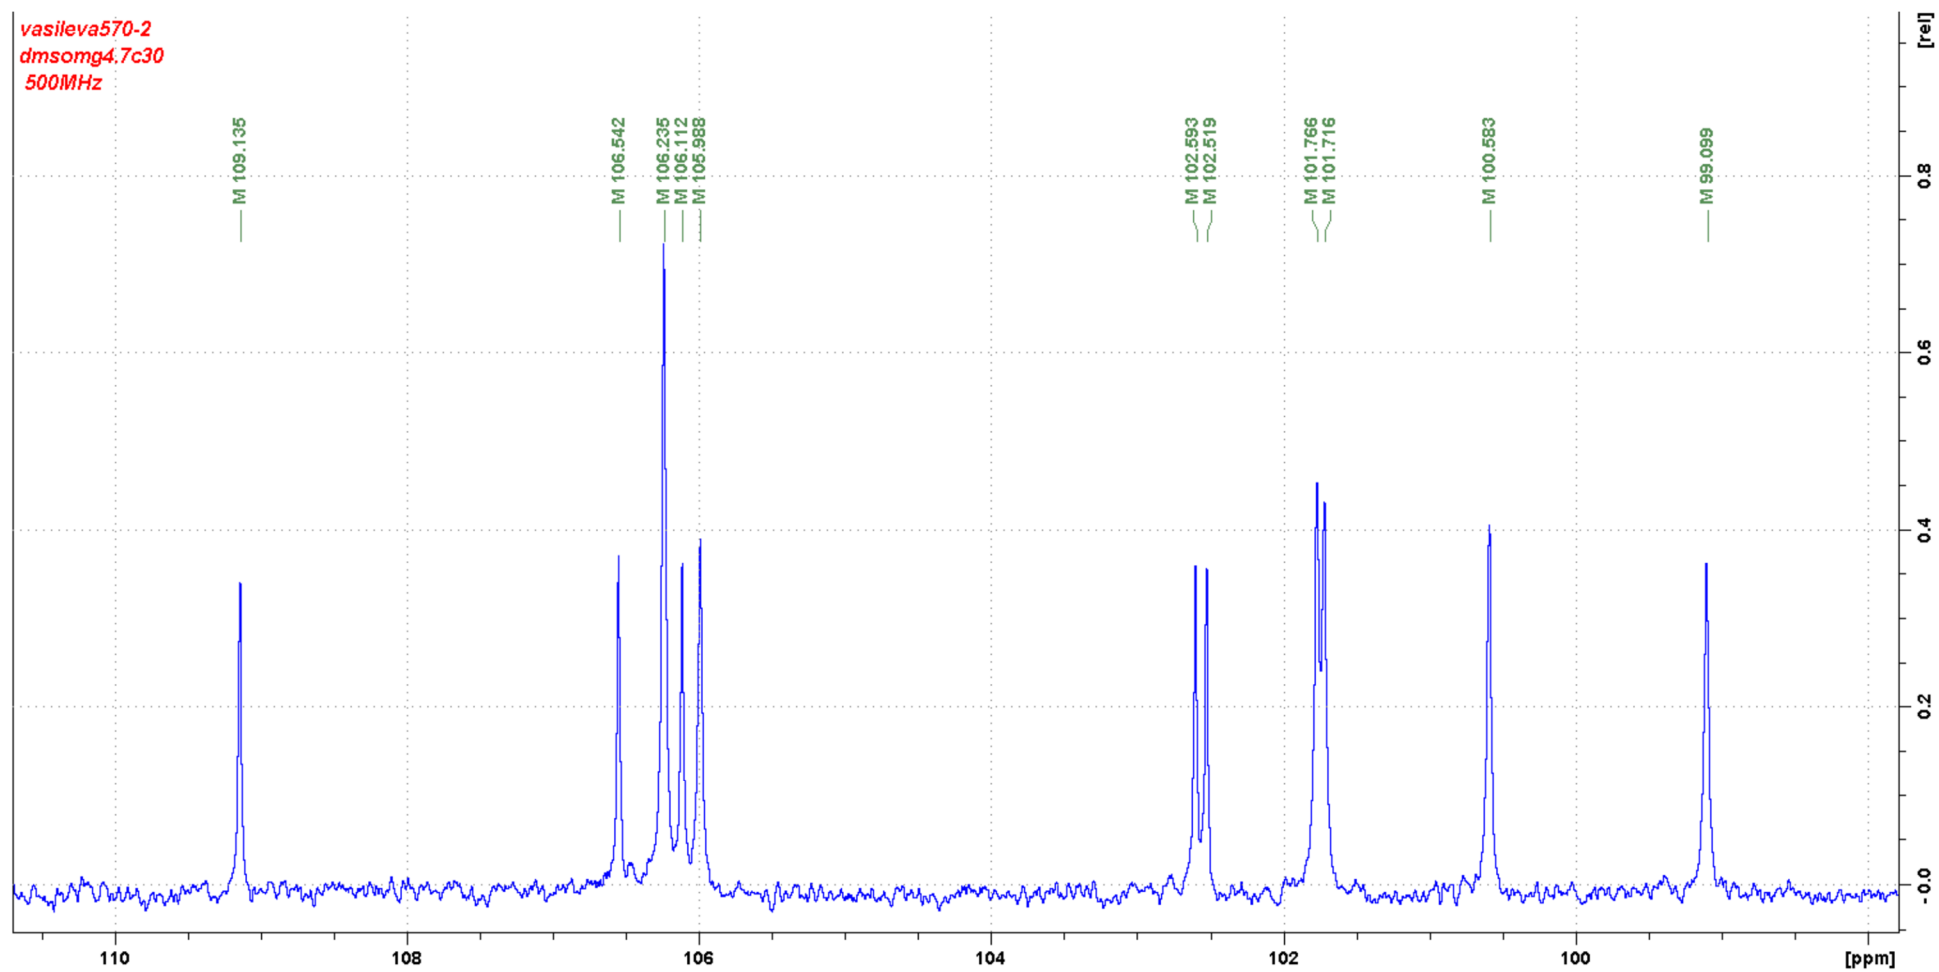

Figure S23. Enlarged fragment of  $^{13}\text{C}$  NMR spectrum of **1** ( $\text{DMSO}-d_6$ , 126 MHz)

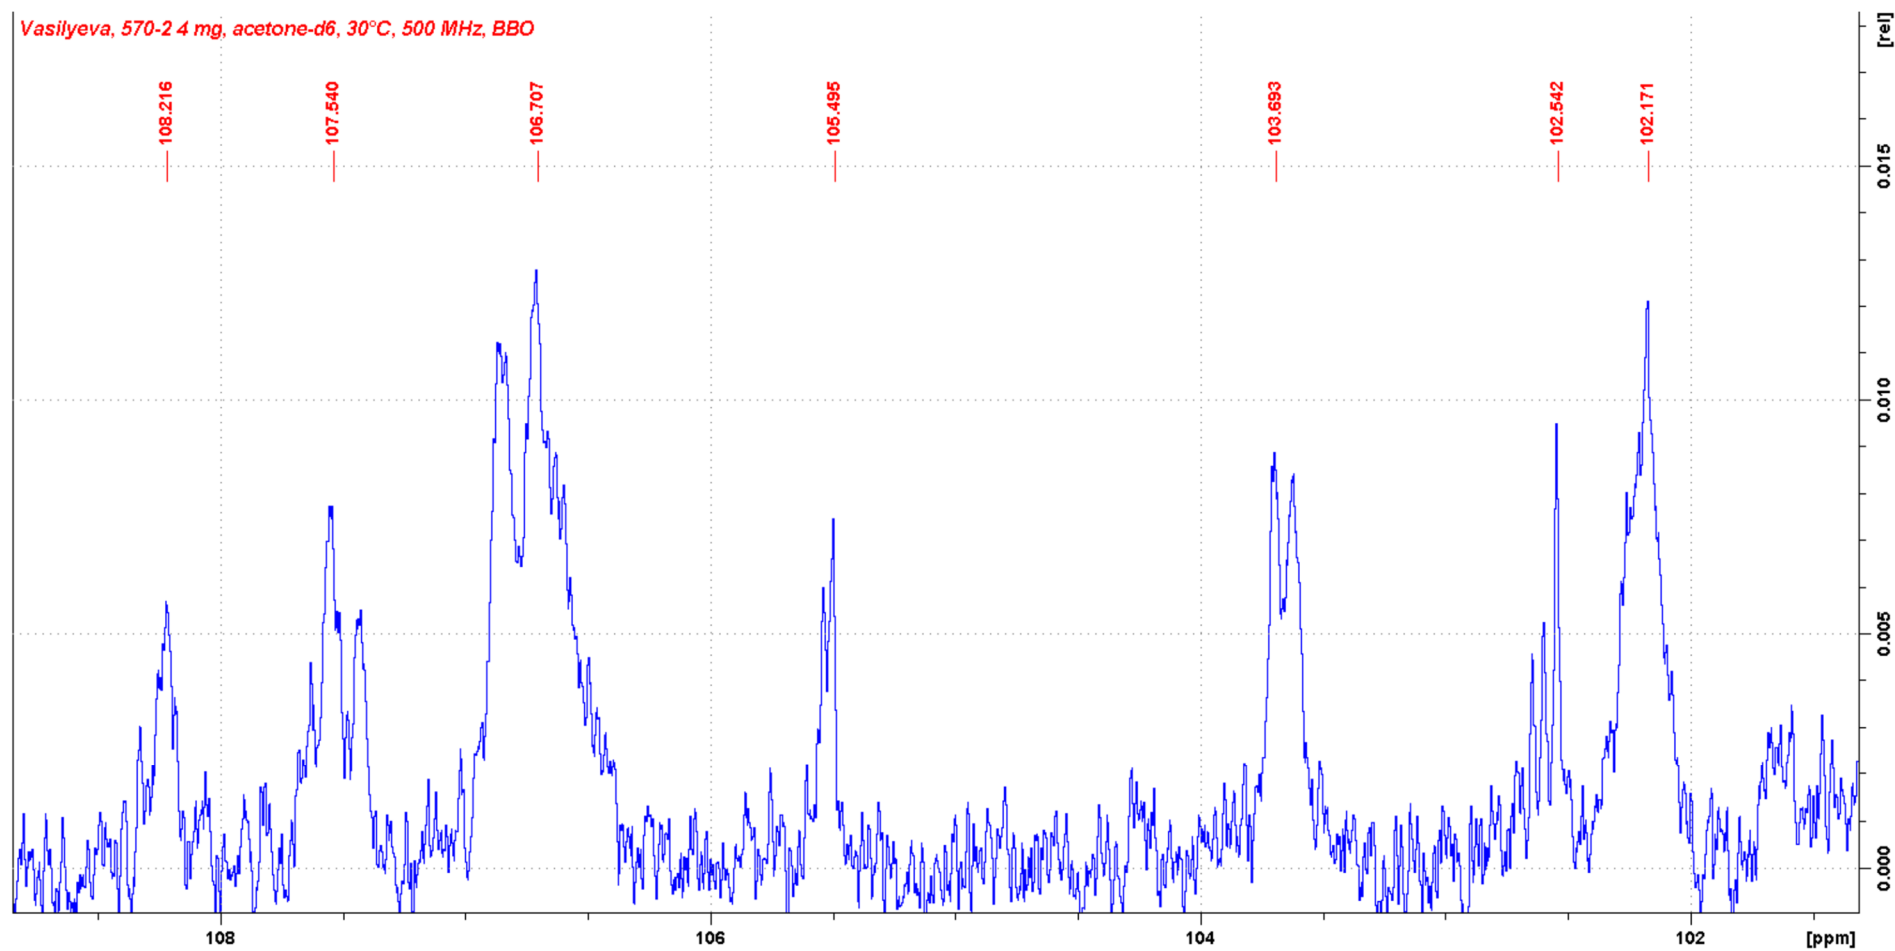

**Figure S24.** Enlarged fragment of  $^{13}\text{C}$  NMR spectrum of **1** (acetone- $d_6$ , 126 MHz). Aromatic carbon signals were poorly resolved



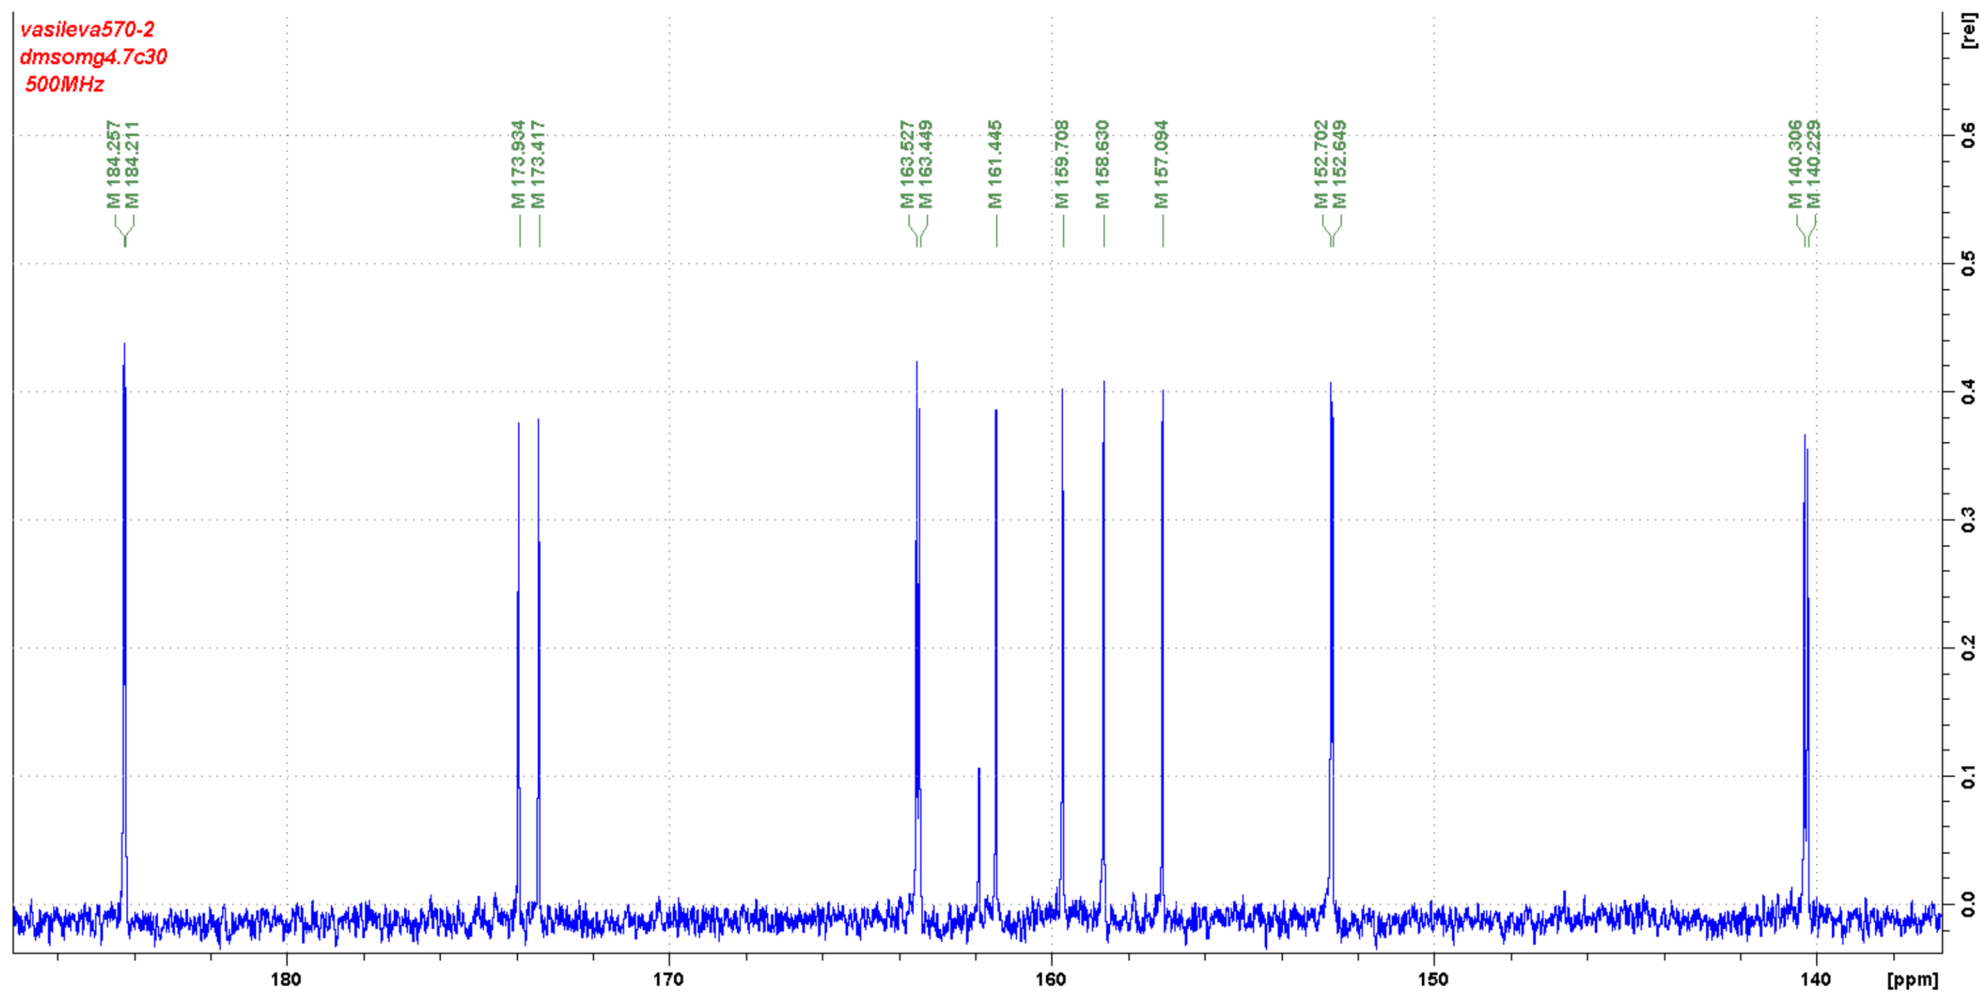

Figure S25. Enlarged fragment of  $^{13}\text{C}$  NMR spectrum of **1** ( $\text{DMSO}-d_6$ , 126 MHz)

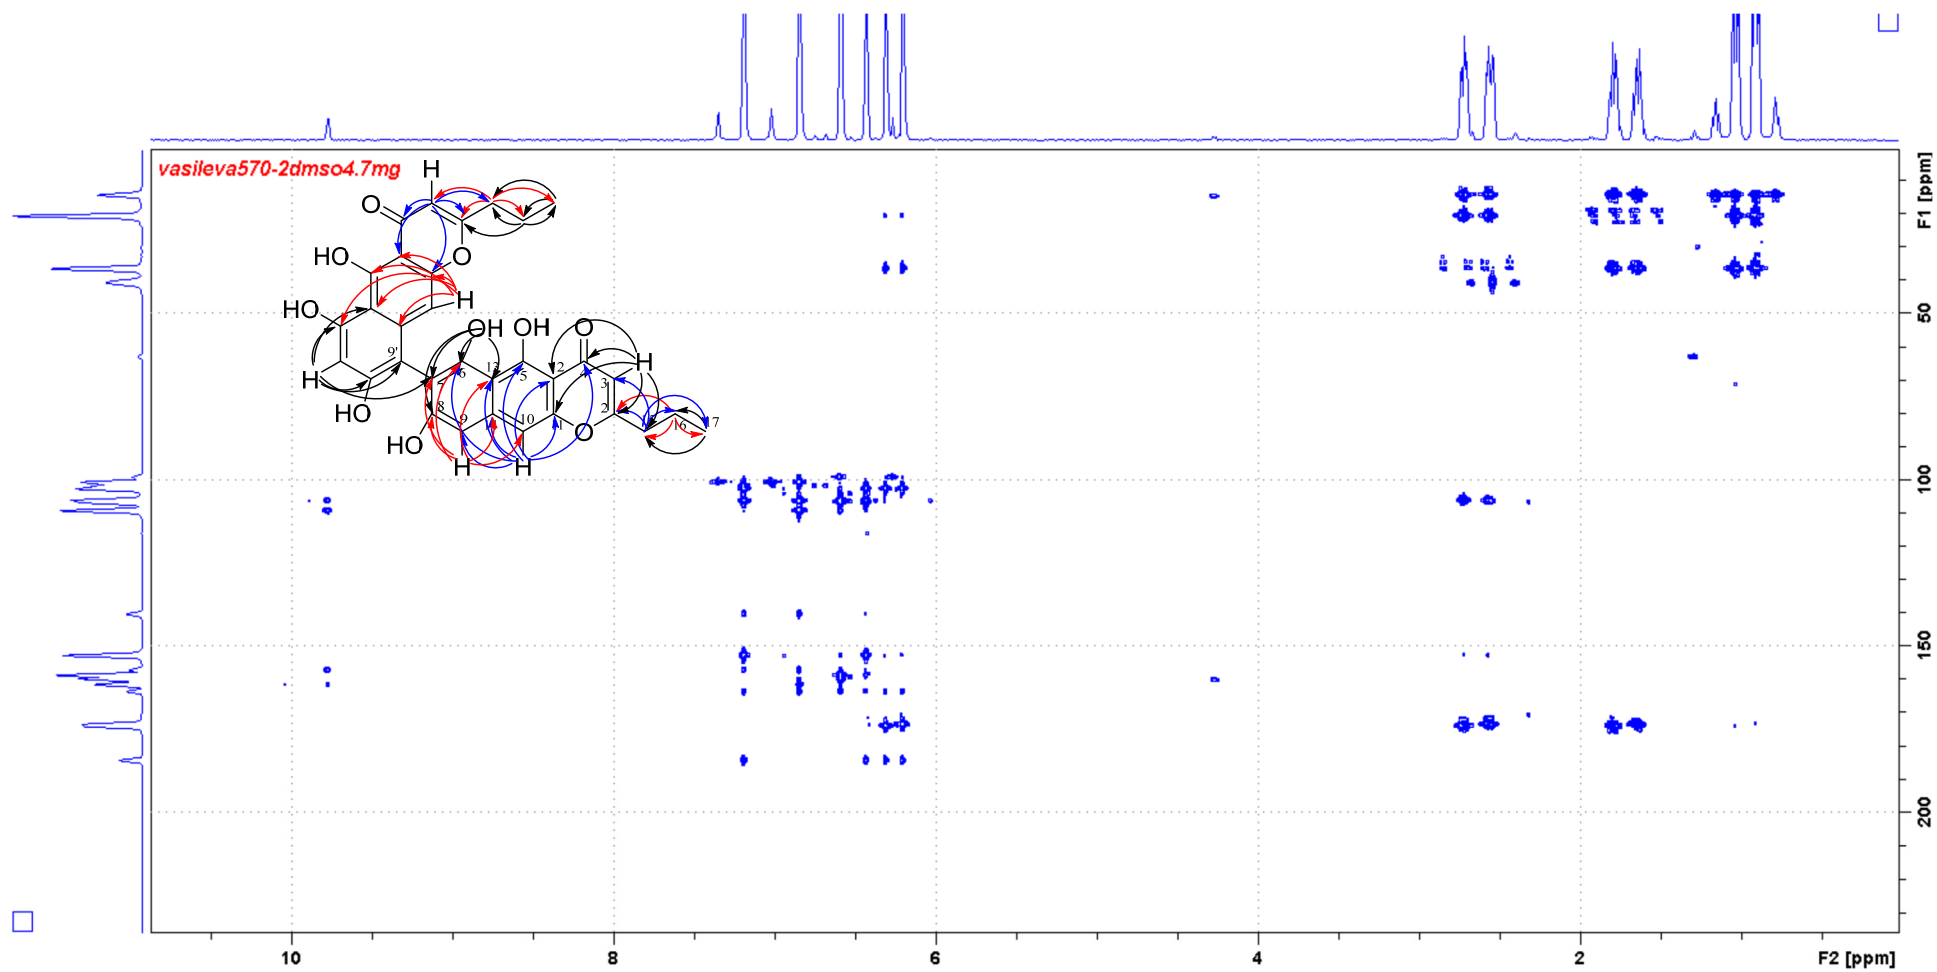

**Figure S26.** HMBC correlations for **1**. (HMBC correlations for other compounds are very similar)

**Table S1.** Crystal data and structure refinement for **1**

|                                         |                                                                                                                             |
|-----------------------------------------|-----------------------------------------------------------------------------------------------------------------------------|
| Empirical formula                       | 2(C <sub>32</sub> H <sub>26</sub> O <sub>10</sub> )·CHCl <sub>3</sub>                                                       |
| Formula weight                          | 1260.42                                                                                                                     |
| Temperature                             | 120(2) K                                                                                                                    |
| Wavelength                              | Mo K $\alpha$ ( $\lambda$ = 0.71073 Å)                                                                                      |
| Crystal system                          | Triclinic                                                                                                                   |
| Space group                             | P $\bar{1}$                                                                                                                 |
| Unit cell dimensions                    | a = 11.4196(15) Å, $\alpha$ = 88.977(9)°<br>b = 16.082(3) Å, $\beta$ = 71.176(6)°<br>c = 16.684(2) Å, $\gamma$ = 71.034(7)° |
| Volume                                  | 2729.8(7) Å <sup>3</sup>                                                                                                    |
| Z                                       | 2                                                                                                                           |
| Dcal                                    | 1.533 g/cm <sup>3</sup>                                                                                                     |
| $\mu$                                   | 0.254 mm <sup>-1</sup>                                                                                                      |
| F(000)                                  | 1308                                                                                                                        |
| Crystal size                            | 0.17×0.08×0.02 mm <sup>3</sup>                                                                                              |
| Data collection area in $\theta$ , deg. | 1.296 – 26.447                                                                                                              |
| Index ranges                            | –14 < h < 14, –10 < k < 18, –20 < l < 20                                                                                    |
| Reflections collected                   | 18836                                                                                                                       |
| Independent reflections                 | 10145 [R(int) = 0.0929]                                                                                                     |
| Data / restraints / parameters          | 10145 / 39 / 853                                                                                                            |
| Goodness-of-fit on F <sup>2</sup>       | 0.922                                                                                                                       |
| Final R indices [I > 2 $\sigma$ (I)]    | R1 = 0.0722, wR2 = 0.1309                                                                                                   |
| R indices (all data)                    | R1 = 0.2337, wR2 = 0.1867                                                                                                   |
| Residual electron density (min/max),    | –0.292 / 0.351 e/Å <sup>3</sup>                                                                                             |

**Table S2.** Selected bond lengths in the structure of **1**

| Bond         | d, Å     | Bond         | d, Å     |
|--------------|----------|--------------|----------|
| C(1)–C(2)    | 1.354(8) | C(36)–O(12)  | 1.344(7) |
| C(1)–O(5)    | 1.378(6) | C(36)–C(37)  | 1.402(8) |
| C(1)–C(14)   | 1.478(7) | C(37)–C(42)  | 1.424(8) |
| C(2)–C(3)    | 1.403(7) | C(37)–C(38)  | 1.430(7) |
| C(2)–H(2)    | 0.9500   | C(38)–O(13)  | 1.346(6) |
| C(3)–O(1)    | 1.260(6) | C(38)–C(39)  | 1.396(8) |
| C(3)–C(4)    | 1.454(7) | C(39)–C(40)  | 1.419(8) |
| C(4)–C(5)    | 1.390(7) | C(39)–C(48)  | 1.486(7) |
| C(4)–C(13)   | 1.406(7) | C(40)–O(14)  | 1.347(6) |
| C(5)–O(2)    | 1.350(6) | C(40)–C(41)  | 1.371(7) |
| C(5)–C(6)    | 1.398(7) | C(41)–C(42)  | 1.414(7) |
| C(6)–C(7)    | 1.430(7) | C(41)–H(41)  | 0.9500   |
| C(6)–C(11)   | 1.437(7) | C(42)–C(43)  | 1.435(7) |
| C(7)–C(8)    | 1.365(7) | C(43)–C(44)  | 1.346(7) |
| C(7)–O(3)    | 1.366(6) | C(43)–H(43)  | 0.9500   |
| C(8)–C(9)    | 1.378(7) | C(44)–O(15)  | 1.382(6) |
| C(8)–H(8)    | 0.9500   | C(45)–C(46)  | 1.503(7) |
| C(9)–O(4)    | 1.372(6) | C(45)–H(45A) | 0.9900   |
| C(9)–C(10)   | 1.386(7) | C(45)–H(45B) | 0.9900   |
| C(10)–C(11)  | 1.414(7) | C(46)–C(47)  | 1.529(7) |
| C(10)–C(17)  | 1.492(7) | C(46)–H(46A) | 0.9900   |
| C(11)–C(12)  | 1.425(7) | C(46)–H(46B) | 0.9900   |
| C(12)–C(13)  | 1.360(7) | C(47)–H(47A) | 0.9800   |
| C(12)–H(12)  | 0.9500   | C(47)–H(47B) | 0.9800   |
| C(13)–O(5)   | 1.391(6) | C(47)–H(47C) | 0.9800   |
| C(14)–C(15)  | 1.529(9) | C(48)–C(60)  | 1.377(7) |
| C(14)–H(14A) | 0.9900   | C(48)–C(49)  | 1.412(7) |

|              |           |              |           |
|--------------|-----------|--------------|-----------|
| C(14)—H(14B) | 0.9900    | C(49)—C(50)  | 1.414(7)  |
| C(15)—C(16)  | 1.570(10) | C(49)—C(57)  | 1.429(7)  |
| C(15)—H(15A) | 0.9900    | C(50)—C(51)  | 1.354(7)  |
| C(15)—H(15B) | 0.9900    | C(50)—H(50)  | 0.9500    |
| C(16)—H(16A) | 0.9800    | C(51)—O(16)  | 1.393(6)  |
| C(16)—H(16B) | 0.9800    | C(51)—C(55)  | 1.399(7)  |
| C(16)—H(16C) | 0.9800    | C(52)—C(53)  | 1.322(8)  |
| C(17)—C(28)  | 1.378(7)  | C(52)—O(16)  | 1.370(6)  |
| C(17)—C(18)  | 1.413(8)  | C(52)—C(61B) | 1.533(12) |
| C(18)—C(19)  | 1.364(7)  | C(52)—C(61A) | 1.551(11) |
| C(18)—O(6)   | 1.380(6)  | C(53)—C(54)  | 1.424(8)  |
| C(19)—C(20)  | 1.425(7)  | C(53)—H(53)  | 0.9500    |
| C(19)—H(19)  | 0.9500    | C(54)—O(17)  | 1.264(6)  |
| C(20)—C(21)  | 1.416(7)  | C(54)—C(55)  | 1.444(7)  |
| C(20)—C(27)  | 1.422(7)  | C(55)—C(56)  | 1.391(7)  |
| C(21)—C(22)  | 1.377(7)  | C(56)—O(18)  | 1.363(6)  |
| C(21)—H(21)  | 0.9500    | C(56)—C(57)  | 1.414(7)  |
| C(22)—O(7)   | 1.370(6)  | C(57)—C(58)  | 1.430(7)  |
| C(22)—C(26)  | 1.402(8)  | C(58)—C(59)  | 1.353(7)  |
| C(23)—C(24)  | 1.323(8)  | C(58)—O(19)  | 1.368(6)  |
| C(23)—O(7)   | 1.381(6)  | C(59)—C(60)  | 1.408(7)  |
| C(23)—C(29)  | 1.493(7)  | C(59)—H(59)  | 0.9500    |
| C(24)—C(25)  | 1.430(7)  | C(60)—O(20)  | 1.358(6)  |
| C(24)—H(24)  | 0.9500    | O(12)—H(12A) | 0.8400    |
| C(25)—O(8)   | 1.261(7)  | O(13)—H(13)  | 0.8400    |
| C(25)—C(26)  | 1.437(8)  | O(14)—H(14)  | 0.8400    |
| C(26)—C(74)  | 1.398(7)  | O(18)—H(18)  | 0.8400    |
| C(27)—C(74)  | 1.412(7)  | O(19)—H(19A) | 0.8400    |
| C(27)—C(28)  | 1.450(7)  | O(20)—H(20)  | 0.8400    |

|              |          |               |           |
|--------------|----------|---------------|-----------|
| C(28)—O(10)  | 1.352(6) | C(61A)—C(62A) | 1.524(14) |
| C(29)—C(30)  | 1.512(7) | C(61A)—H(61A) | 0.9900    |
| C(29)—H(29A) | 0.9900   | C(61A)—H(61B) | 0.9900    |
| C(29)—H(29B) | 0.9900   | C(62A)—C(63A) | 1.520(15) |
| C(30)—C(31)  | 1.522(7) | C(62A)—H(62A) | 0.9900    |
| C(30)—H(30A) | 0.9900   | C(62A)—H(62B) | 0.9900    |
| C(30)—H(30B) | 0.9900   | C(63A)—H(63A) | 0.9800    |
| C(31)—H(31A) | 0.9800   | C(63A)—H(63B) | 0.9800    |
| C(31)—H(31B) | 0.9800   | C(63A)—H(63C) | 0.9800    |
| C(31)—H(31C) | 0.9800   | C(61B)—C(62B) | 1.525(13) |
| C(74)—O(9)   | 1.337(6) | C(61B)—H(61C) | 0.9900    |
| O(2)—H(2A)   | 0.8400   | C(61B)—H(61D) | 0.9900    |
| O(3)—H(3)    | 0.8400   | C(62B)—C(63B) | 1.507(15) |
| O(4)—H(4)    | 0.8400   | C(62B)—H(62C) | 0.9900    |
| O(6)—H(6)    | 0.8400   | C(62B)—H(62D) | 0.9900    |
| O(9)—H(9)    | 0.8400   | C(63B)—H(63D) | 0.9800    |
| O(10)—H(10)  | 0.8400   | C(63B)—H(63E) | 0.9800    |
| C(32)—C(33)  | 1.333(8) | C(63B)—H(63F) | 0.9800    |
| C(32)—O(15)  | 1.368(6) | C(64)—Cl(1)   | 1.730(7)  |
| C(32)—C(45)  | 1.491(7) | C(64)—Cl(3A)  | 1.738(7)  |
| C(33)—C(34)  | 1.433(7) | C(64)—Cl(2B)  | 1.740(7)  |
| C(33)—H(33)  | 0.9500   | C(64)—Cl(2A)  | 1.785(7)  |
| C(34)—O(11)  | 1.268(7) | C(64)—Cl(3B)  | 1.790(7)  |
| C(34)—C(35)  | 1.418(8) | C(64)—H(64A)  | 1.0000    |
| C(35)—C(36)  | 1.400(7) | C(64)—H(64B)  | 1.0000    |
| C(35)—C(44)  | 1.428(8) |               |           |

**Table S3.** Hydrogen bonds in the structure of **1** (Å and °)

| D—H...A                            | d(D—H) | d(H...A) | d(D...A) | <(DHA) |
|------------------------------------|--------|----------|----------|--------|
| C(2)—H(2)...O(20) <sup>i</sup>     | 0.95   | 2.50     | 3.426(6) | 163.9  |
| C(8)—H(8)...O(14)                  | 0.95   | 2.64     | 3.415(6) | 138.6  |
| C(21)—H(21)...O(13) <sup>ii</sup>  | 0.95   | 2.40     | 3.326(7) | 165.4  |
| O(2)—H(2A)...O(1)                  | 0.84   | 1.75     | 2.506(5) | 149.4  |
| O(3)—H(3)...O(2)                   | 0.84   | 1.87     | 2.597(5) | 143.5  |
| O(4)—H(4)...O(14)                  | 0.84   | 2.43     | 3.131(5) | 142.0  |
| O(4)—H(4)...O(17) <sup>iii</sup>   | 0.84   | 2.49     | 3.013(5) | 121.0  |
| O(6)—H(6)...O(1) <sup>i</sup>      | 0.84   | 1.77     | 2.603(5) | 172.6  |
| O(10)—H(10)...O(9)                 | 0.84   | 1.85     | 2.604(5) | 147.9  |
| C(43)—H(43)...O(10) <sup>iv</sup>  | 0.95   | 2.50     | 3.406(7) | 159.4  |
| O(12)—H(12A)...O(11)               | 0.84   | 1.71     | 2.473(5) | 150.8  |
| O(13)—H(13)...O(12)                | 0.84   | 1.85     | 2.587(5) | 146.5  |
| O(14)—H(14)...O(17) <sup>iii</sup> | 0.84   | 2.00     | 2.685(5) | 138.4  |
| O(18)—H(18)...O(17)                | 0.84   | 1.78     | 2.532(5) | 148.7  |
| O(19)—H(19A)...O(18)               | 0.84   | 1.87     | 2.612(5) | 146.1  |
| O(20)—H(20)...O(6)                 | 0.84   | 1.93     | 2.740(5) | 160.3  |
| C(64)—H(64A)...O(15) <sup>v</sup>  | 1.00   | 2.52     | 3.377(8) | 144.1  |

Symmetry transformations used to generate equivalent atoms: (i)  $-x+2, -y, -z+1$ ; (ii)  $-x+1, -y+1, -z+1$ ; (iii)  $-x, -y+1, -z+1$ ; (iv)  $-x+1, -y, -z+1$ ; (v)  $x, y+1, z$

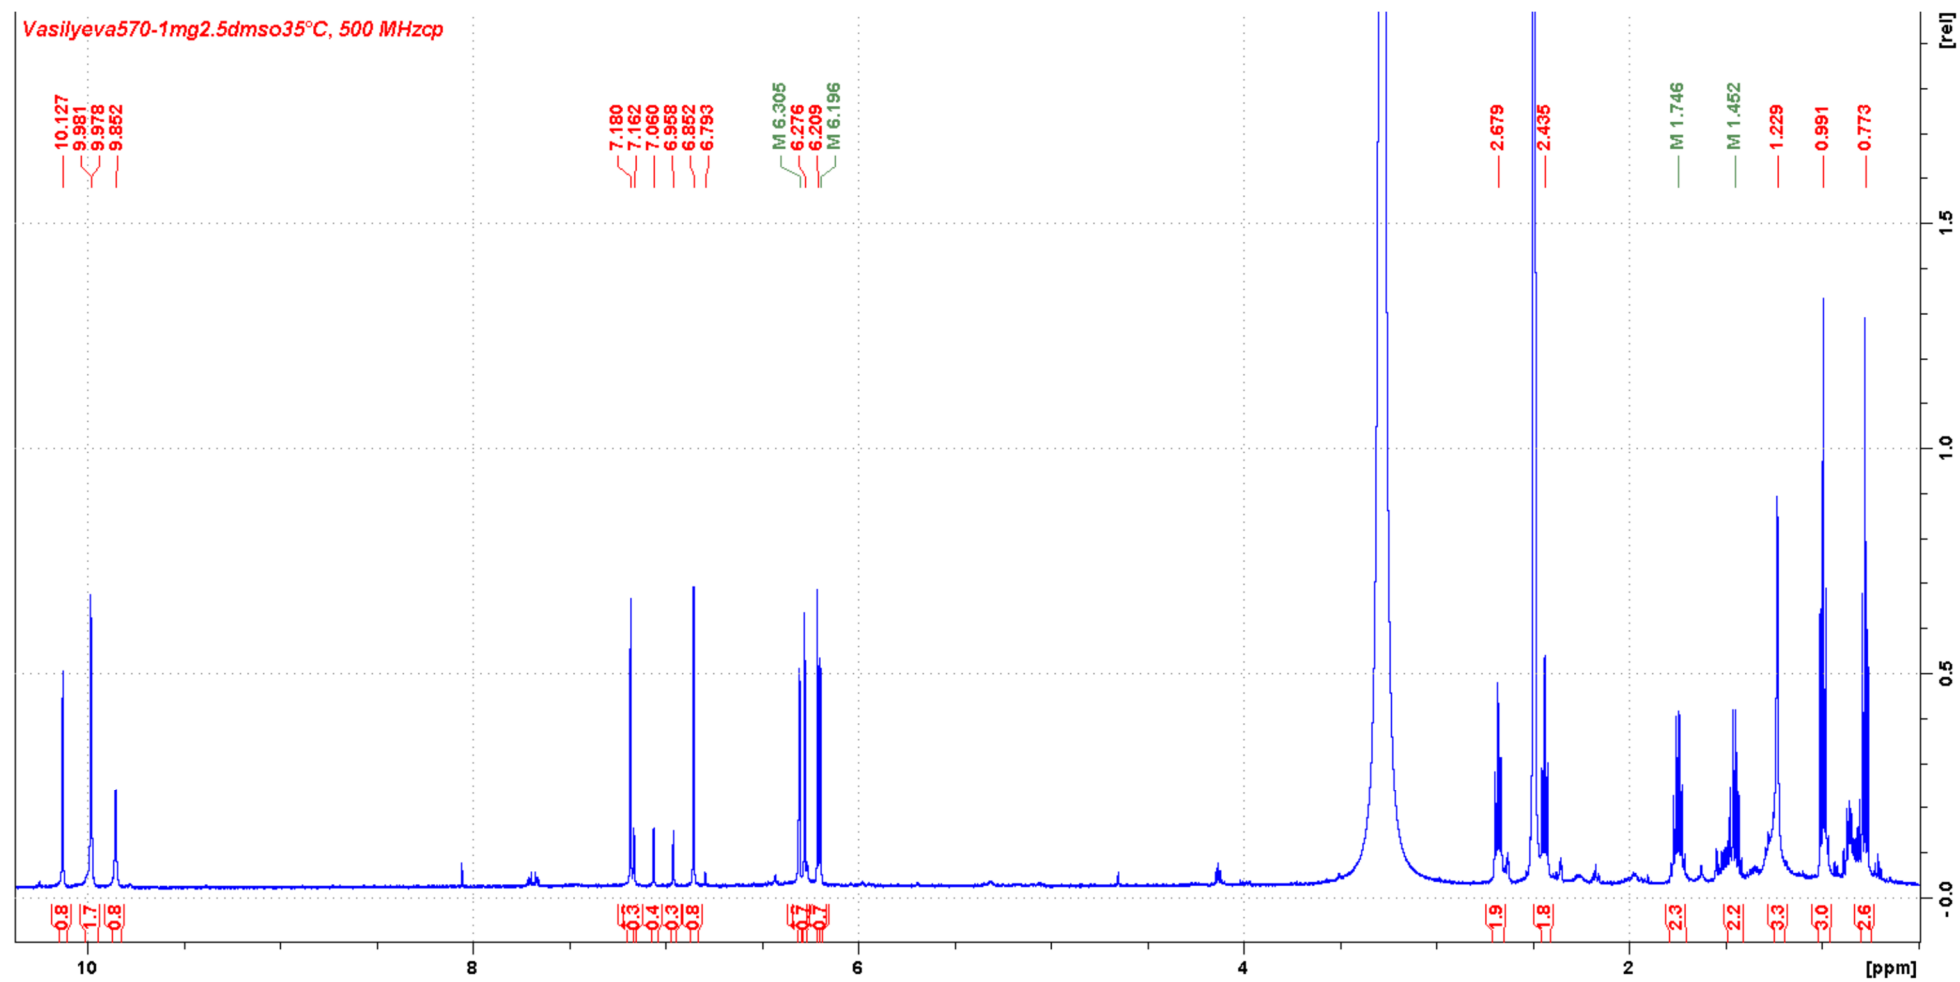

Figure S27.  $^1\text{H}$  NMR spectrum of 2 ( $\text{DMSO}-d_6$ , 500 MHz)



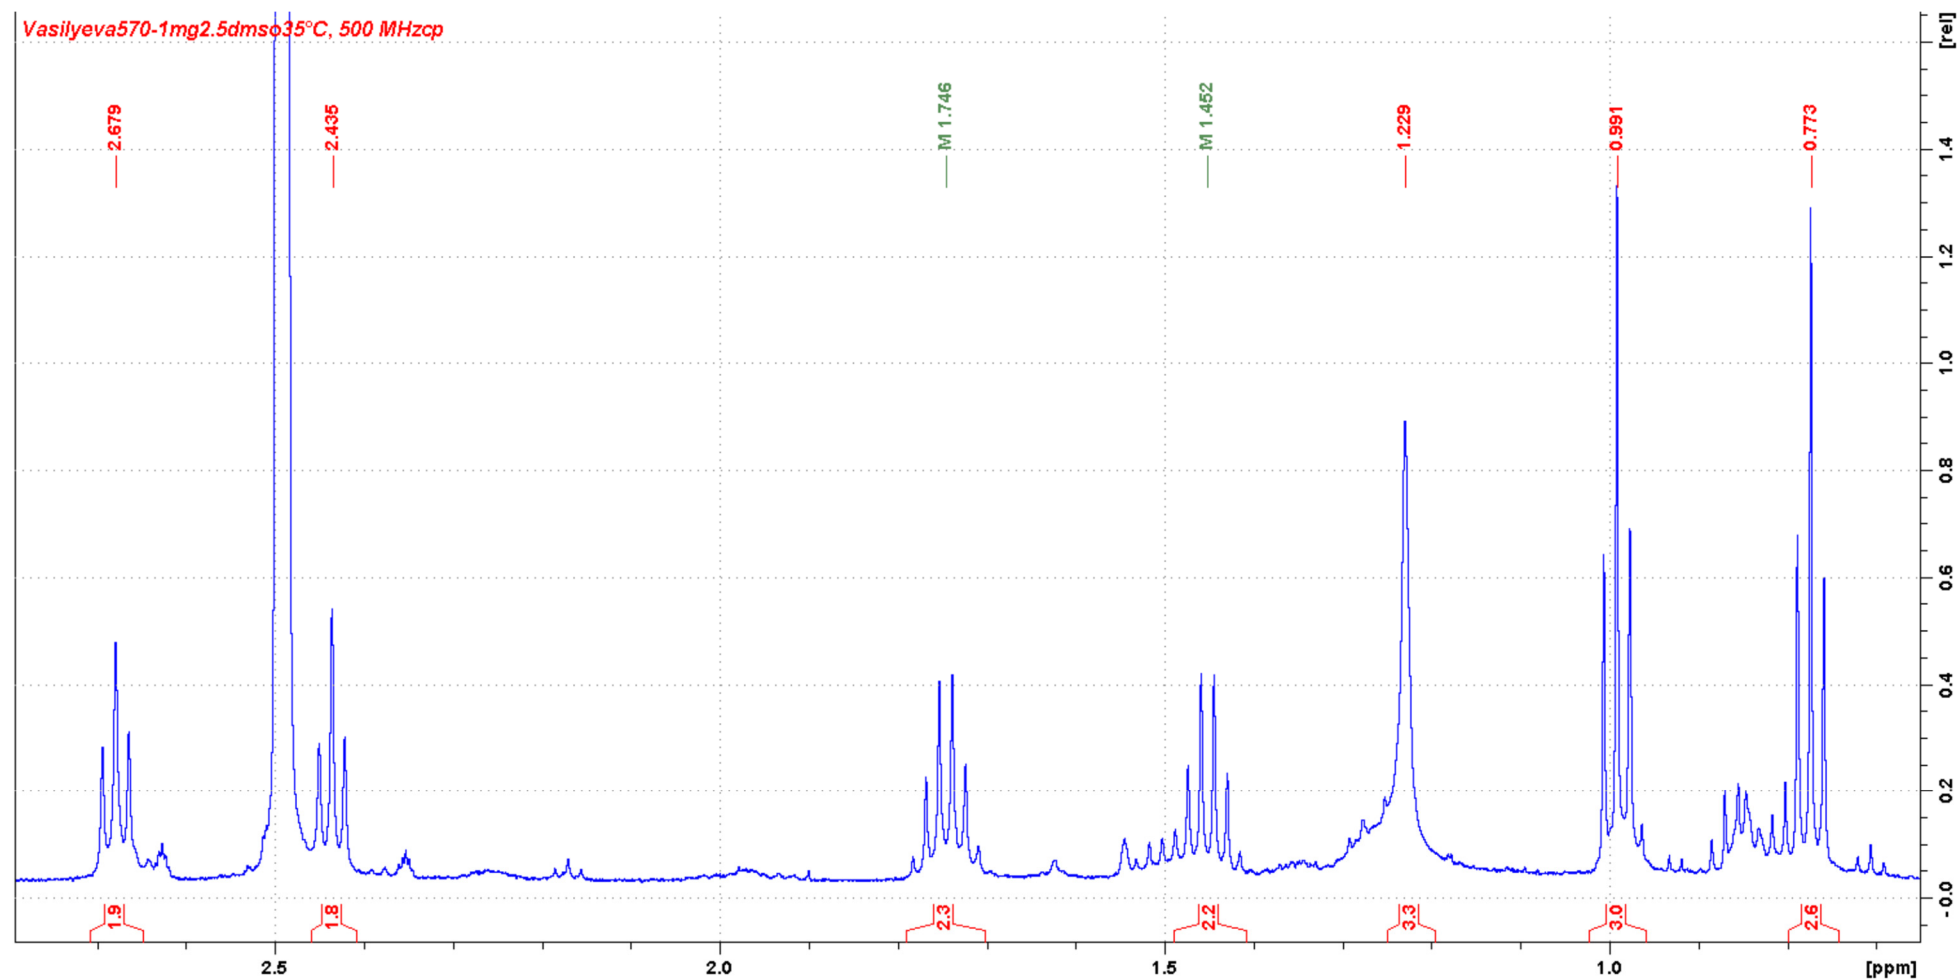

Figure S28. Enlarged fragment of  $^1\text{H}$  NMR spectrum of **2** (DMSO- $d_6$ , 500 MHz)

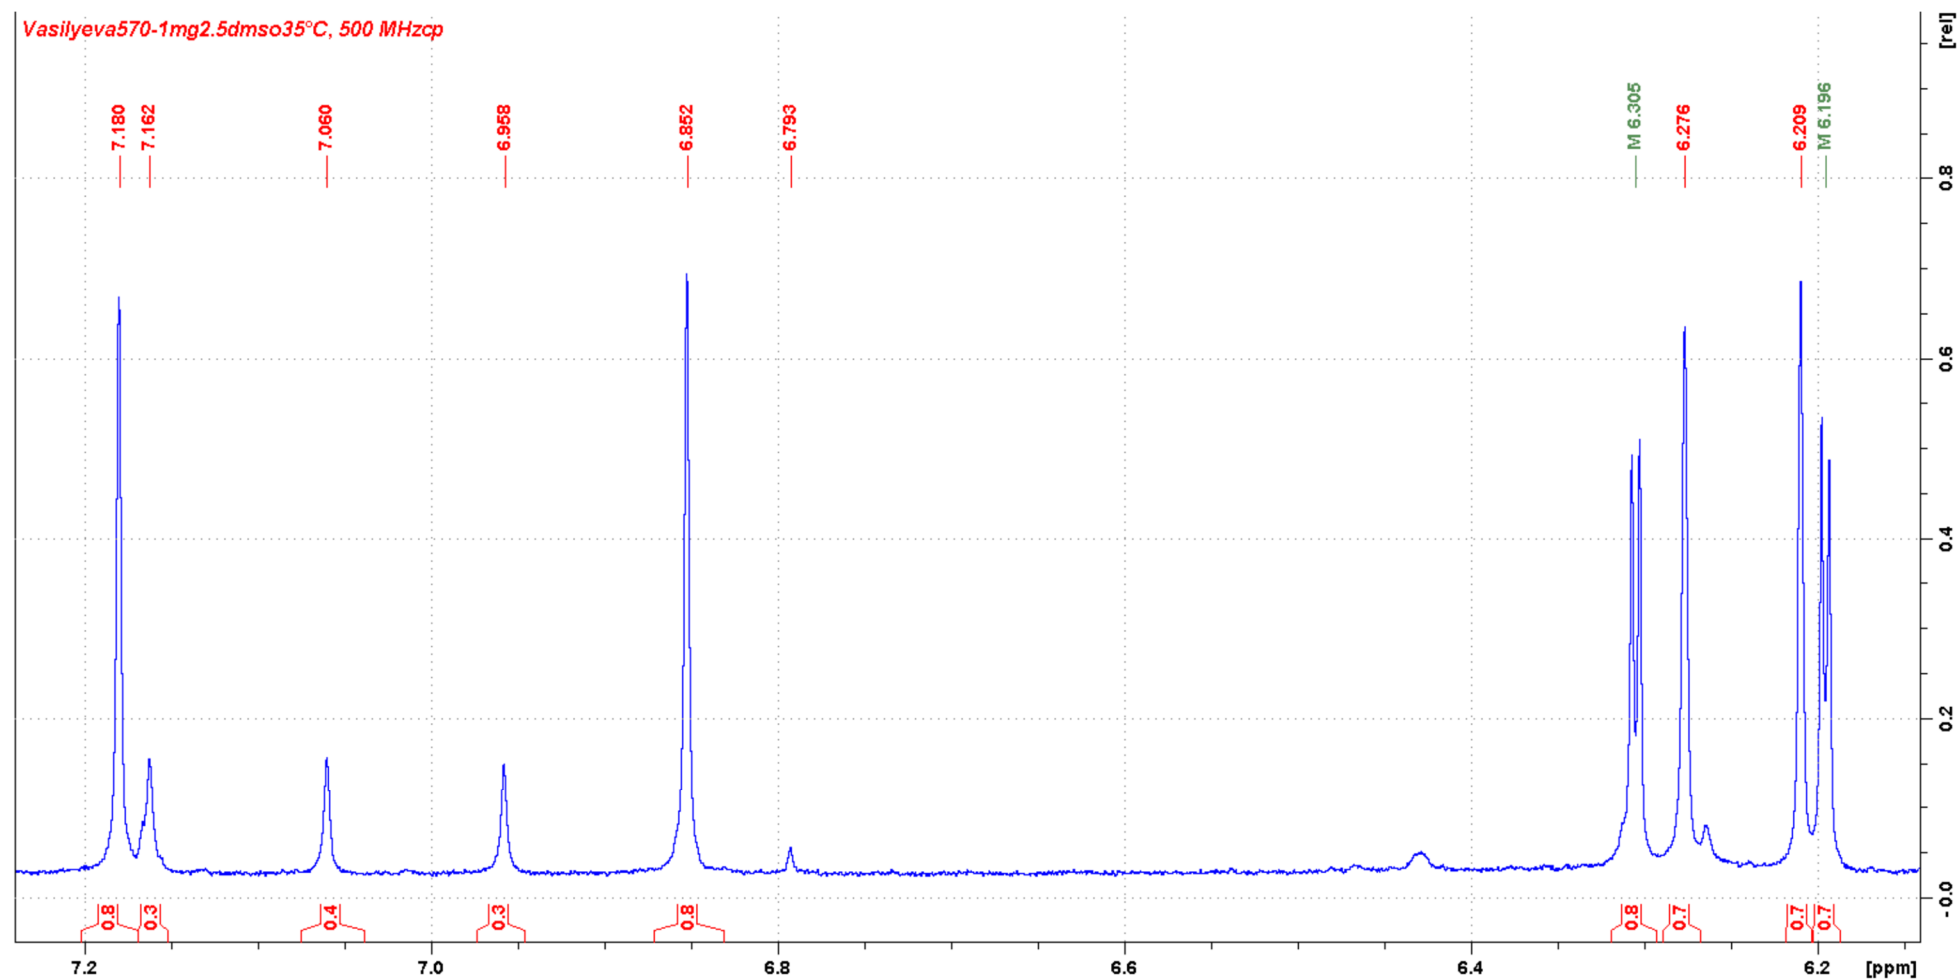

Figure S29. Enlarged fragment of  $^1\text{H}$  NMR spectrum of **2** ( $\text{DMSO-}d_6$ , 500 MHz)

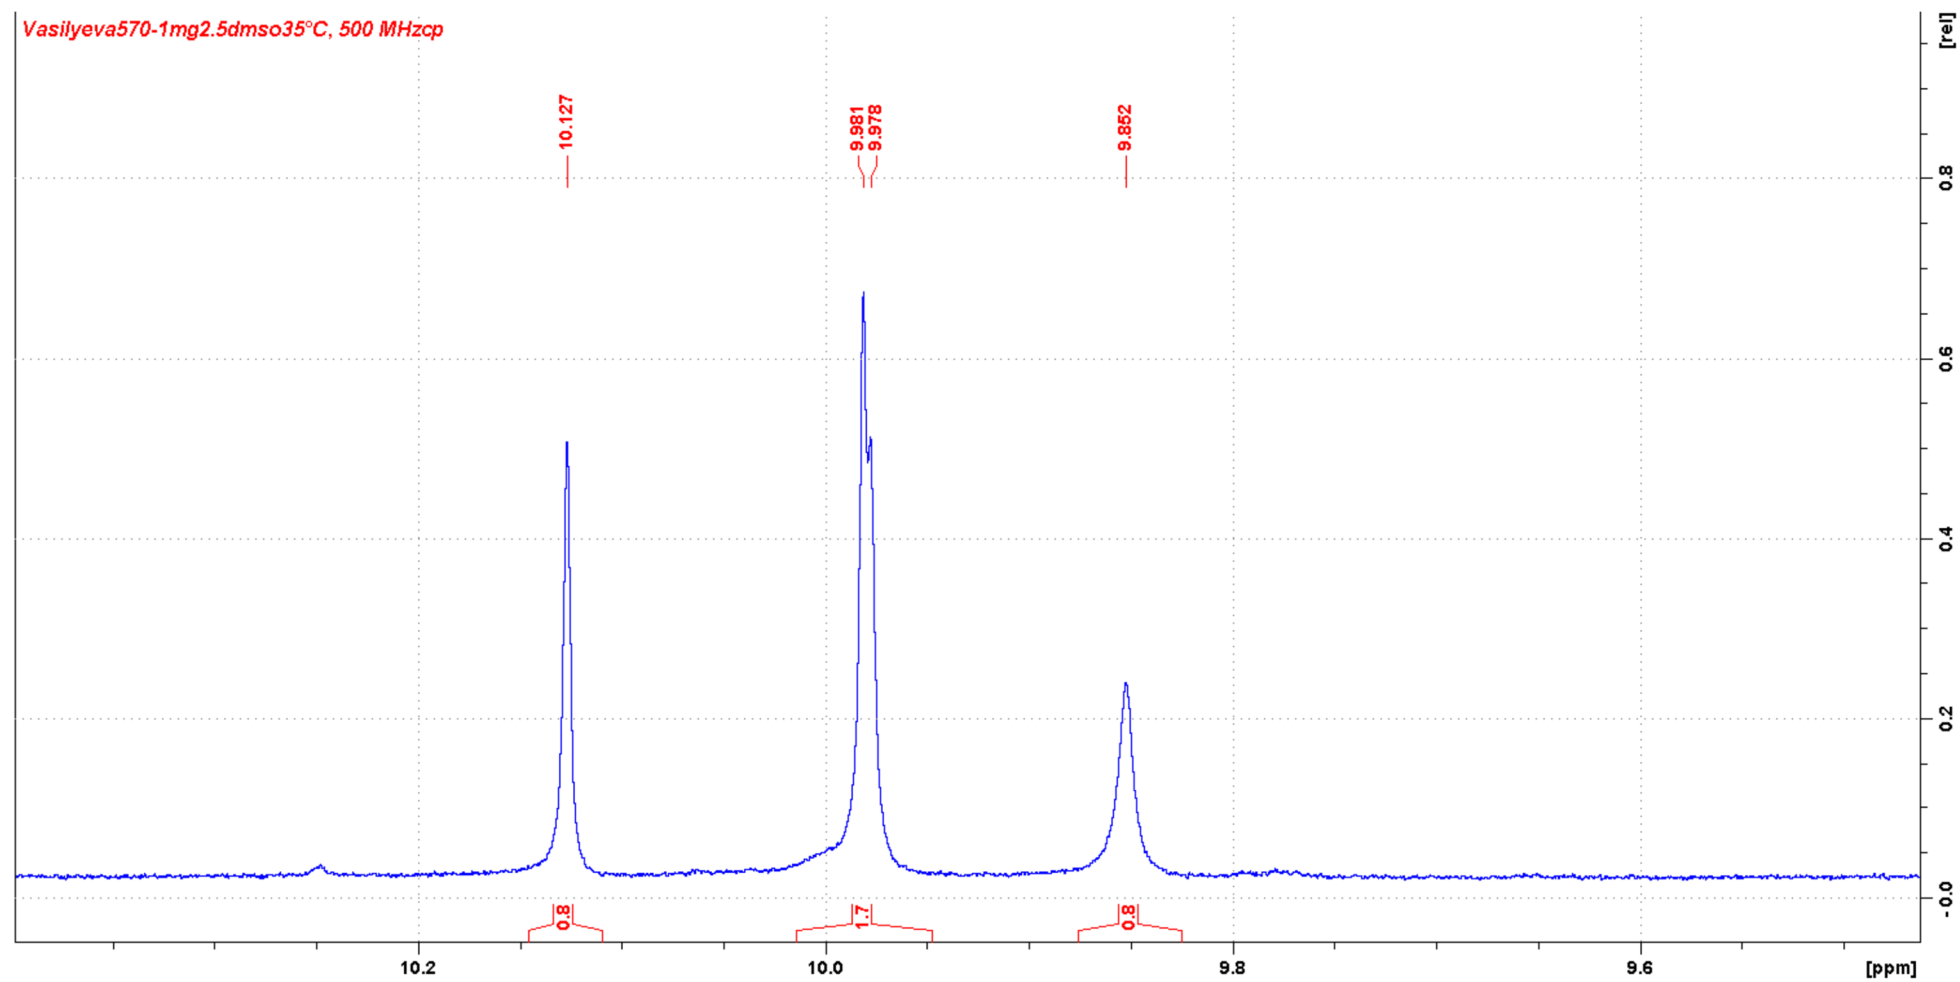

**Figure S30.** Enlarged fragment of  $^1\text{H}$  NMR spectrum of **2** ( $\text{DMSO-}d_6$ , 500 MHz)

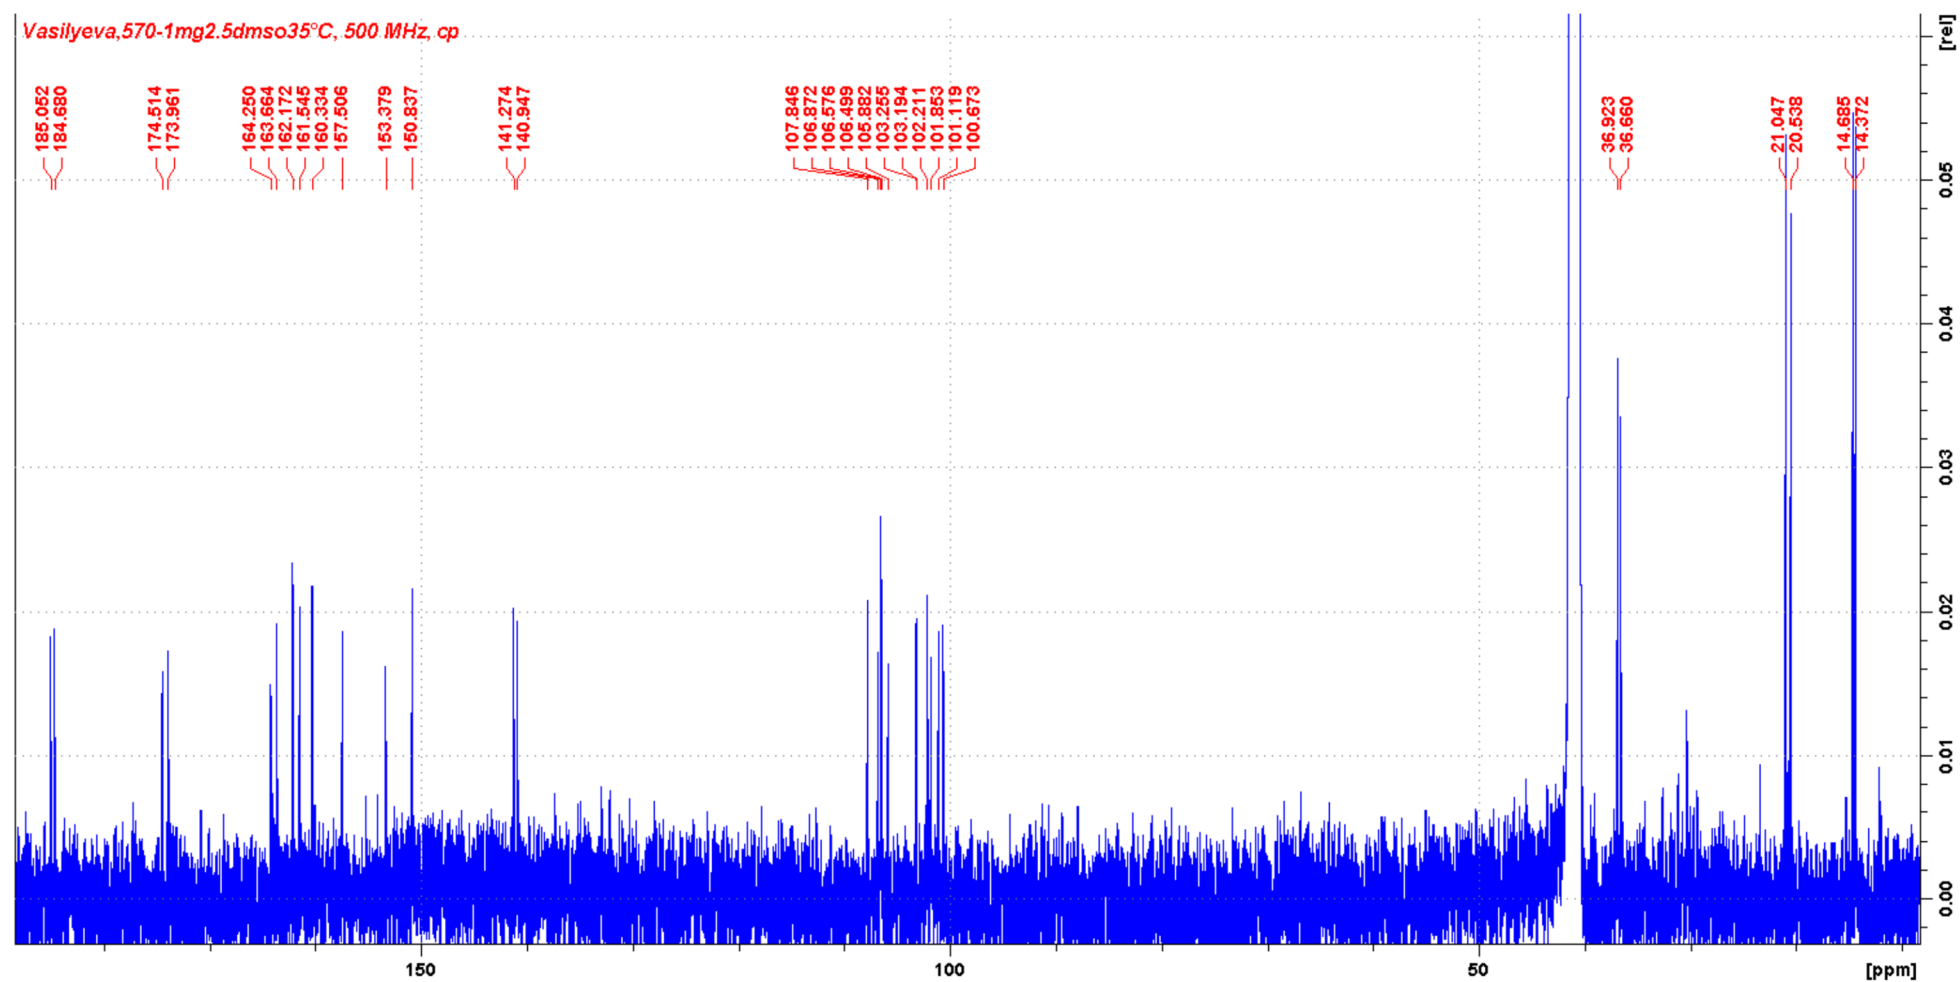

Figure S31.  $^{13}\text{C}$  NMR spectrum of **2** (DMSO- $d_6$ , 126 MHz)

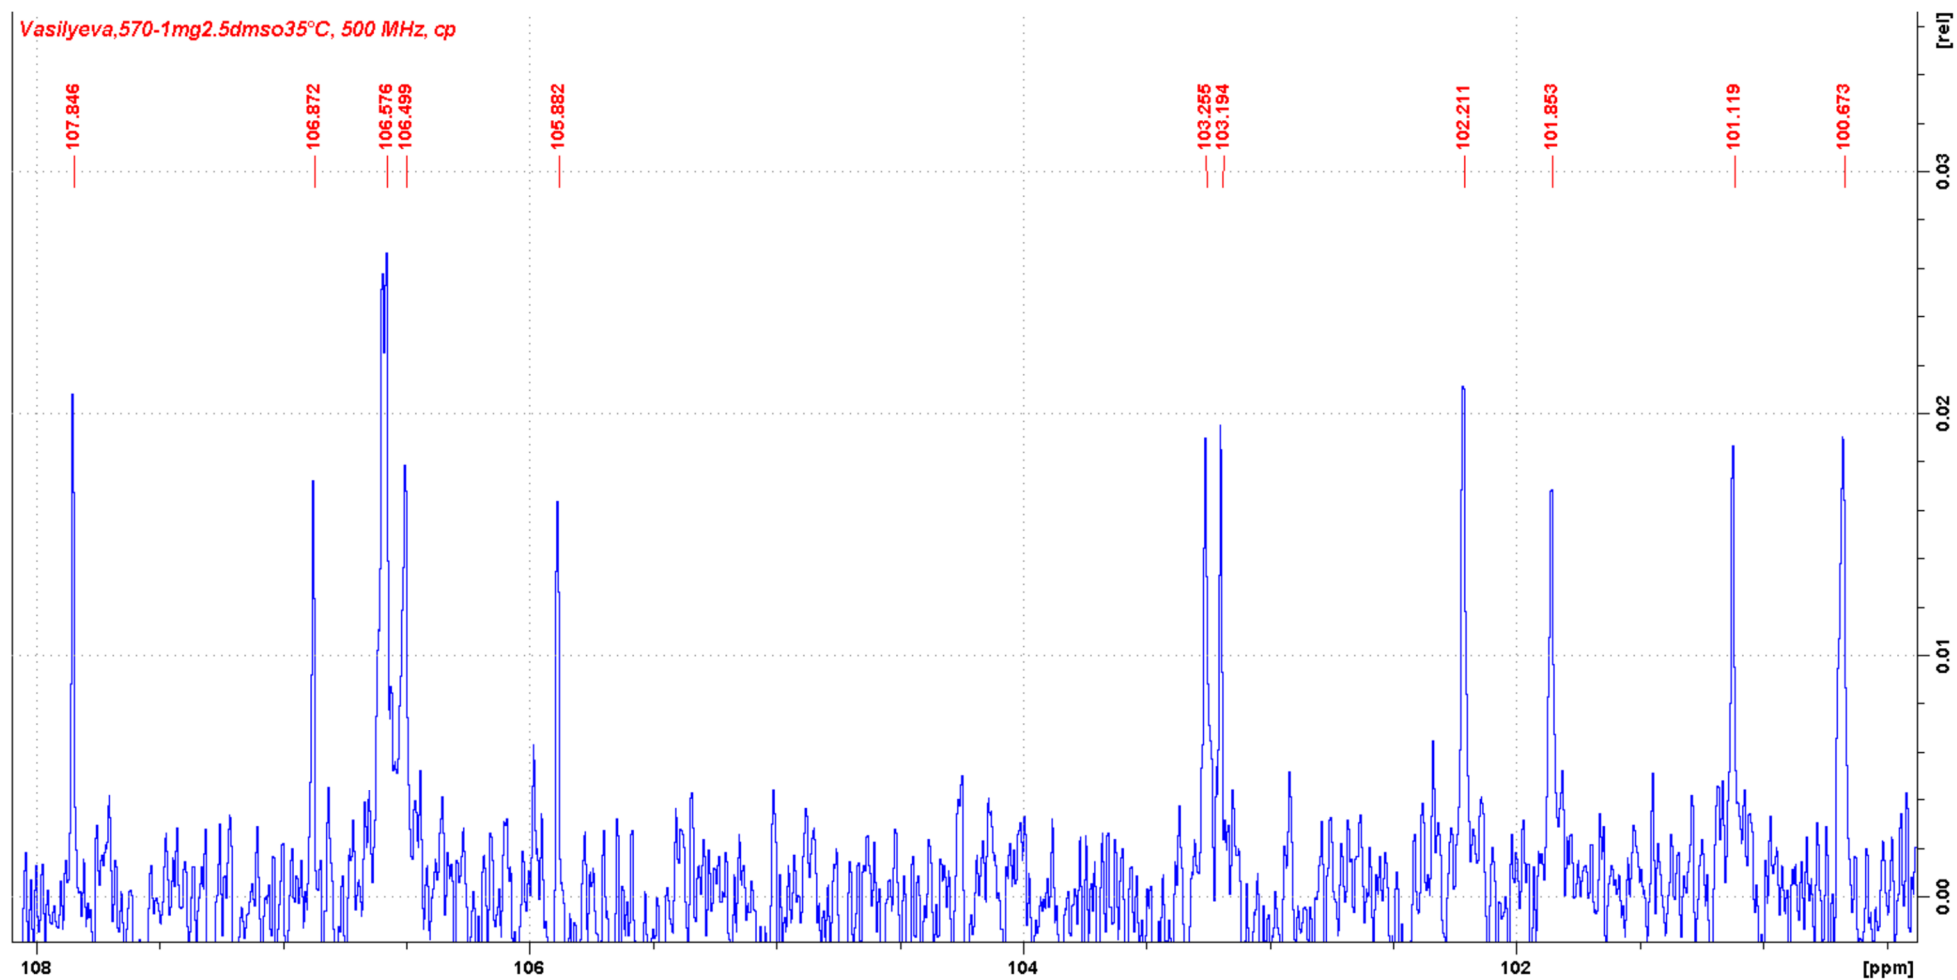

**Figure S32.** Enlarged fragment of  $^{13}\text{C}$  NMR spectrum of **2** ( $\text{DMSO}-d_6$ , 126 MHz)

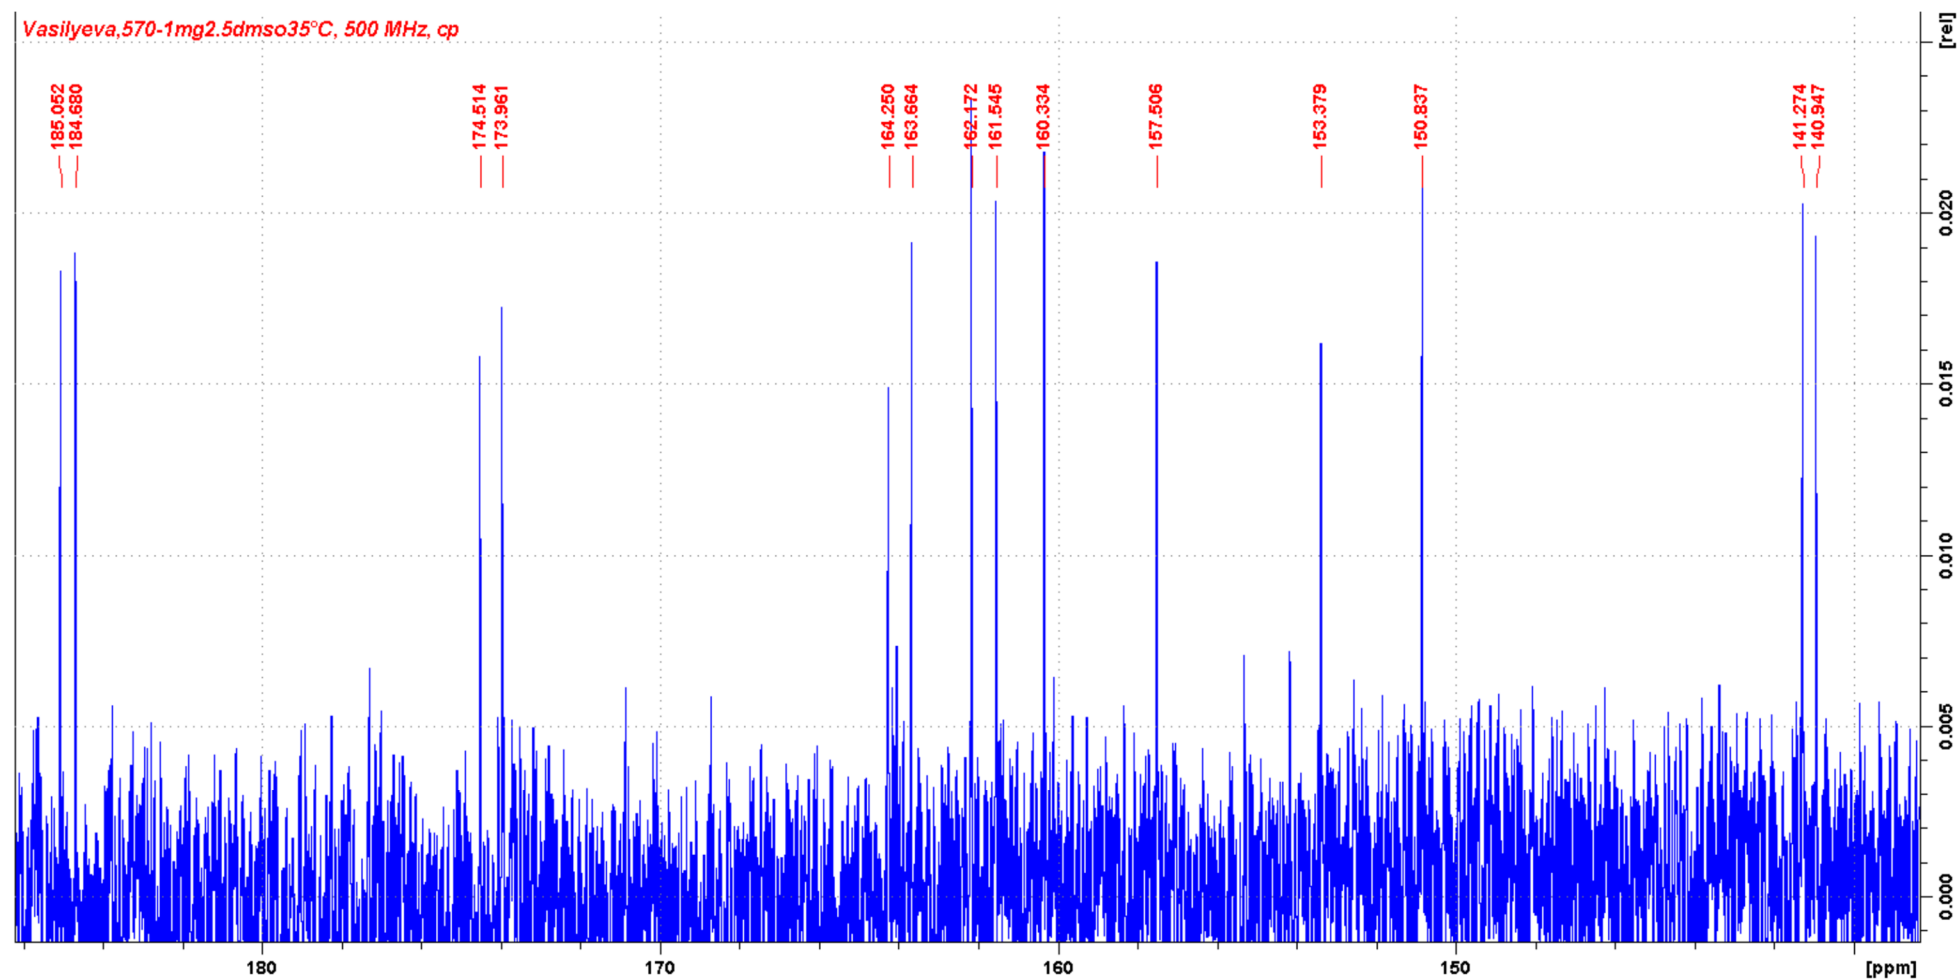

**Figure S33.** Enlarged fragment of  $^{13}\text{C}$  NMR spectrum of **2** ( $\text{DMSO}-d_6$ , 126 MHz)

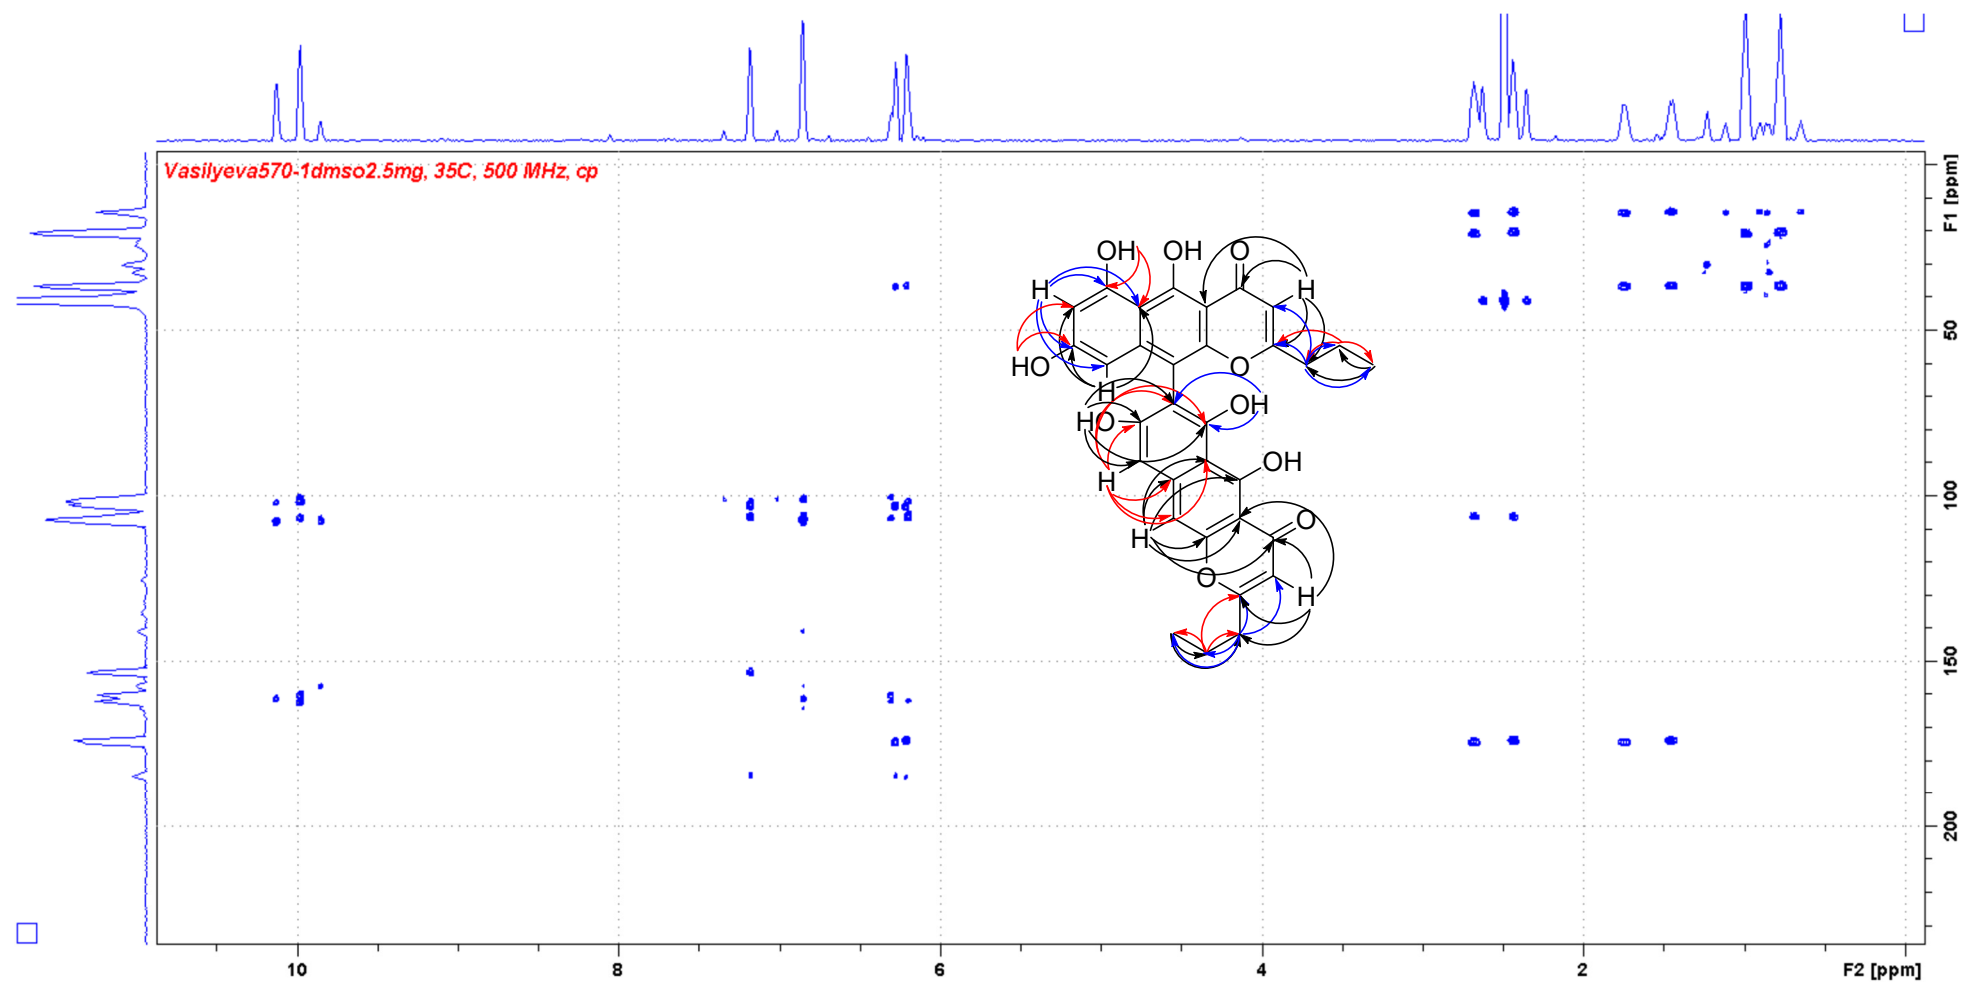

Figure S34. HMBC spectrum of 2

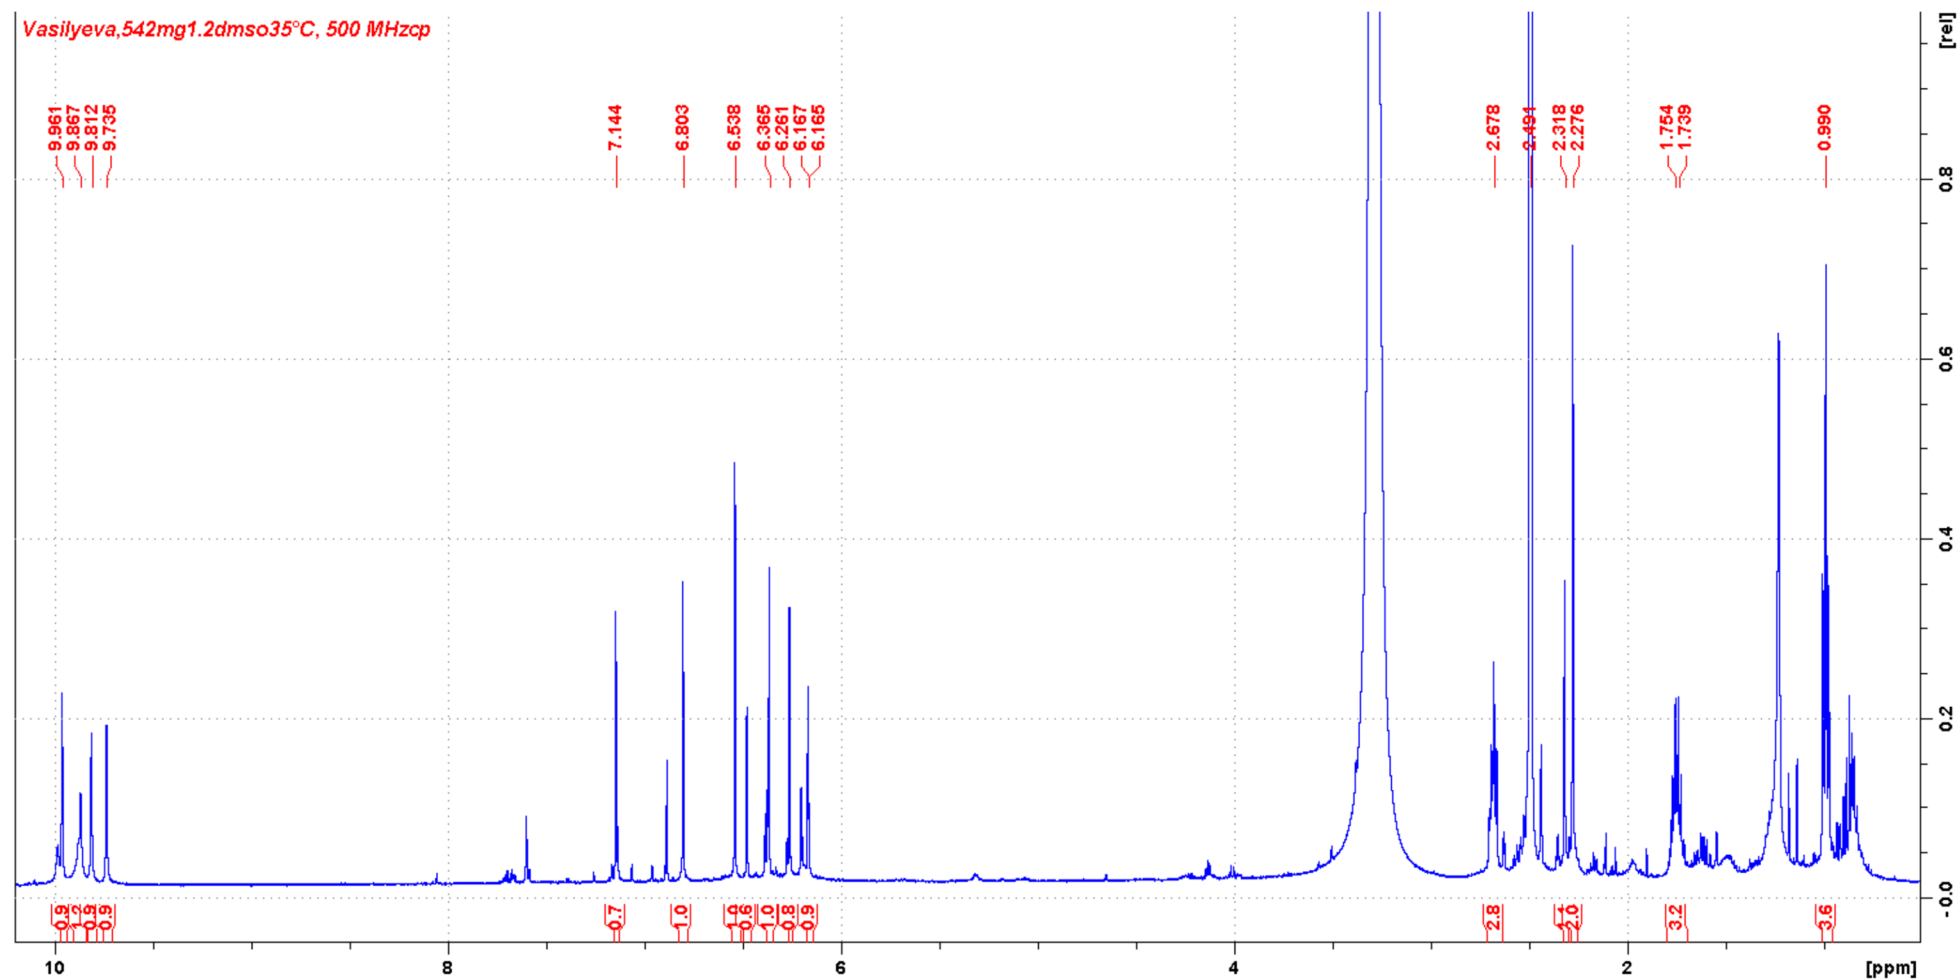

Figure S35. <sup>1</sup>H NMR spectrum of 3 (DMSO-*d*<sub>6</sub>, 500 MHz)



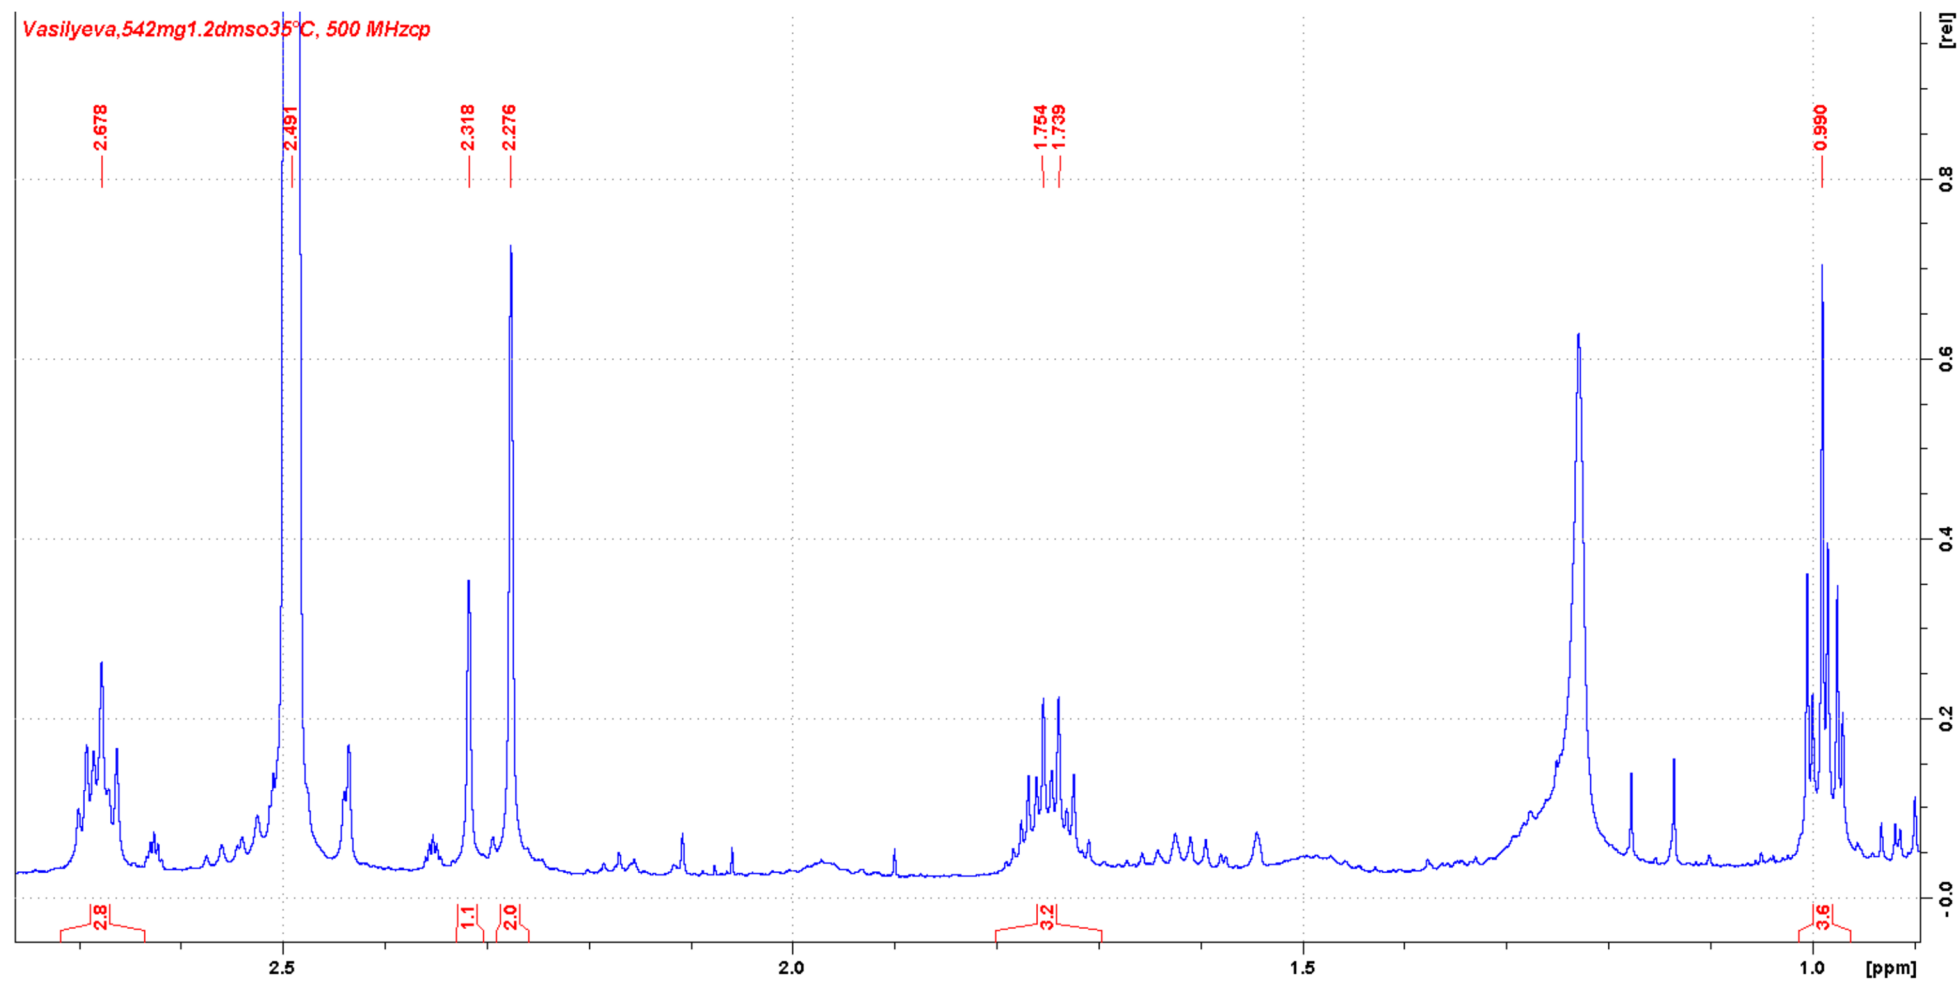

**Figure S36.** Enlarged fragment of  $^1\text{H}$  NMR spectrum of 3 ( $\text{DMSO-}d_6$ , 500 MHz)

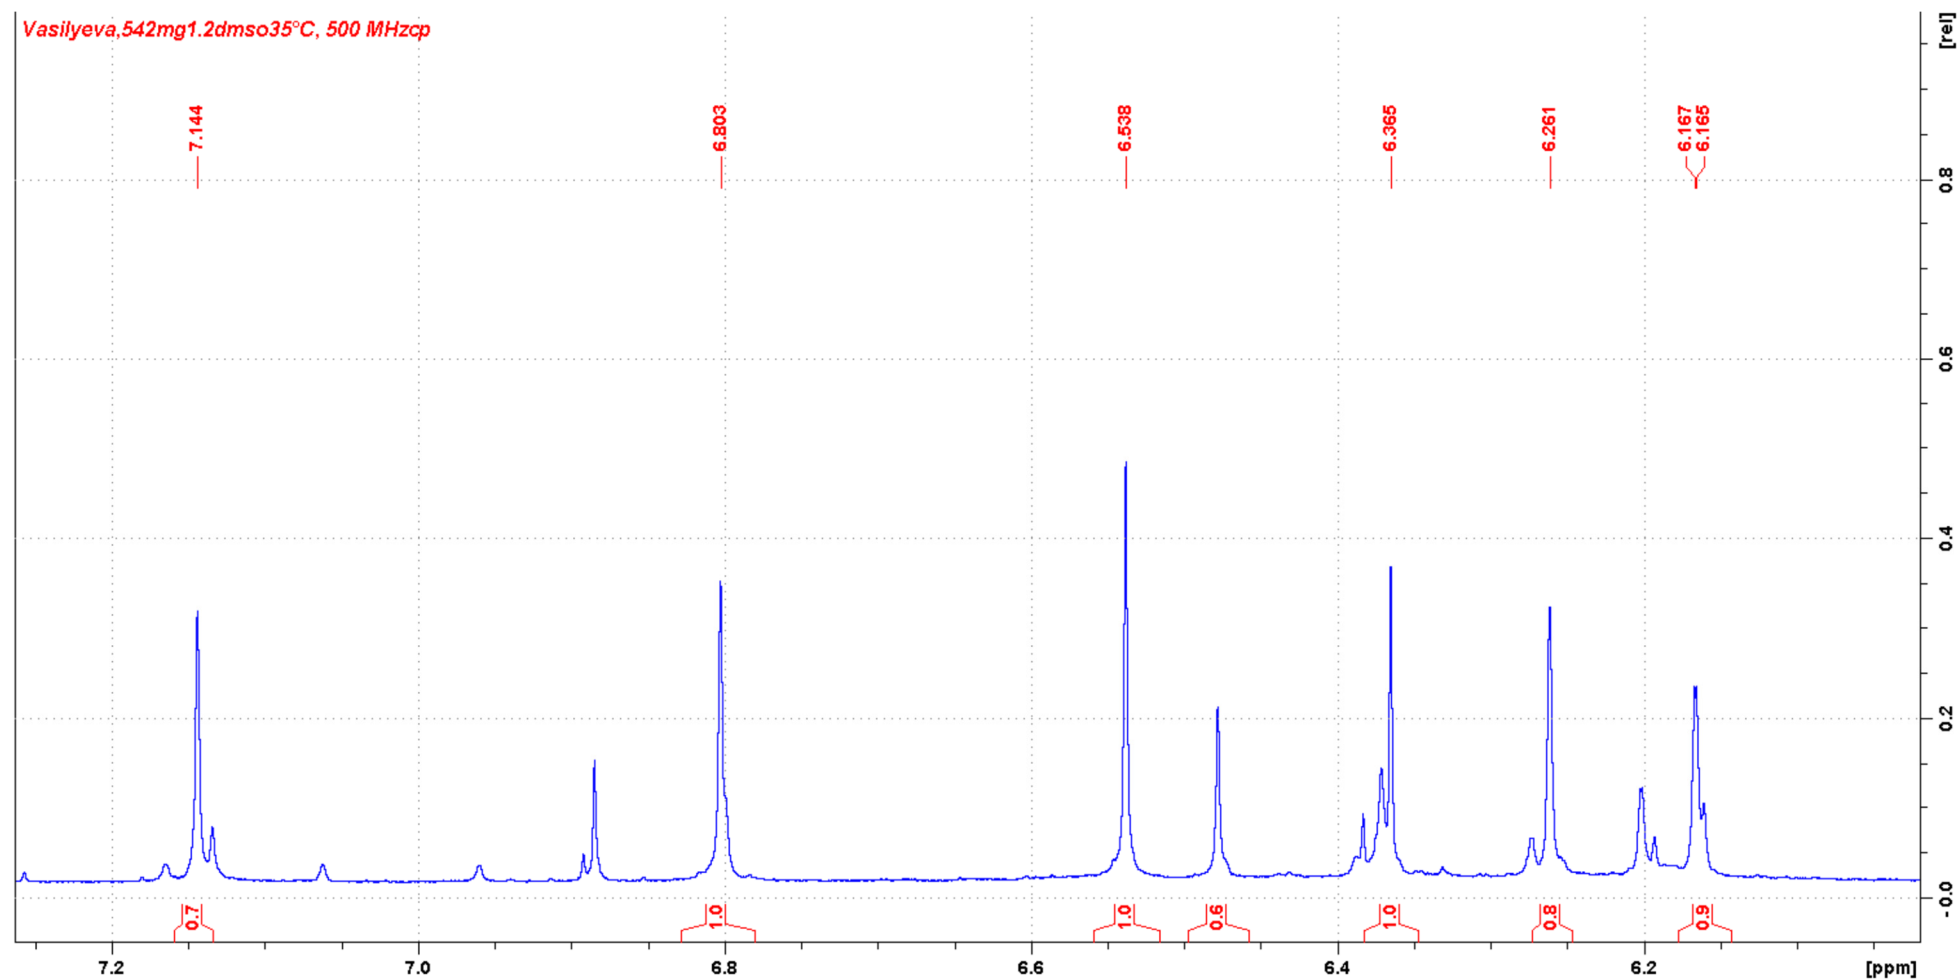

**Figure S37.** Enlarged fragment of  $^1\text{H}$  NMR spectrum of **3** ( $\text{DMSO-}d_6$ , 500 MHz)

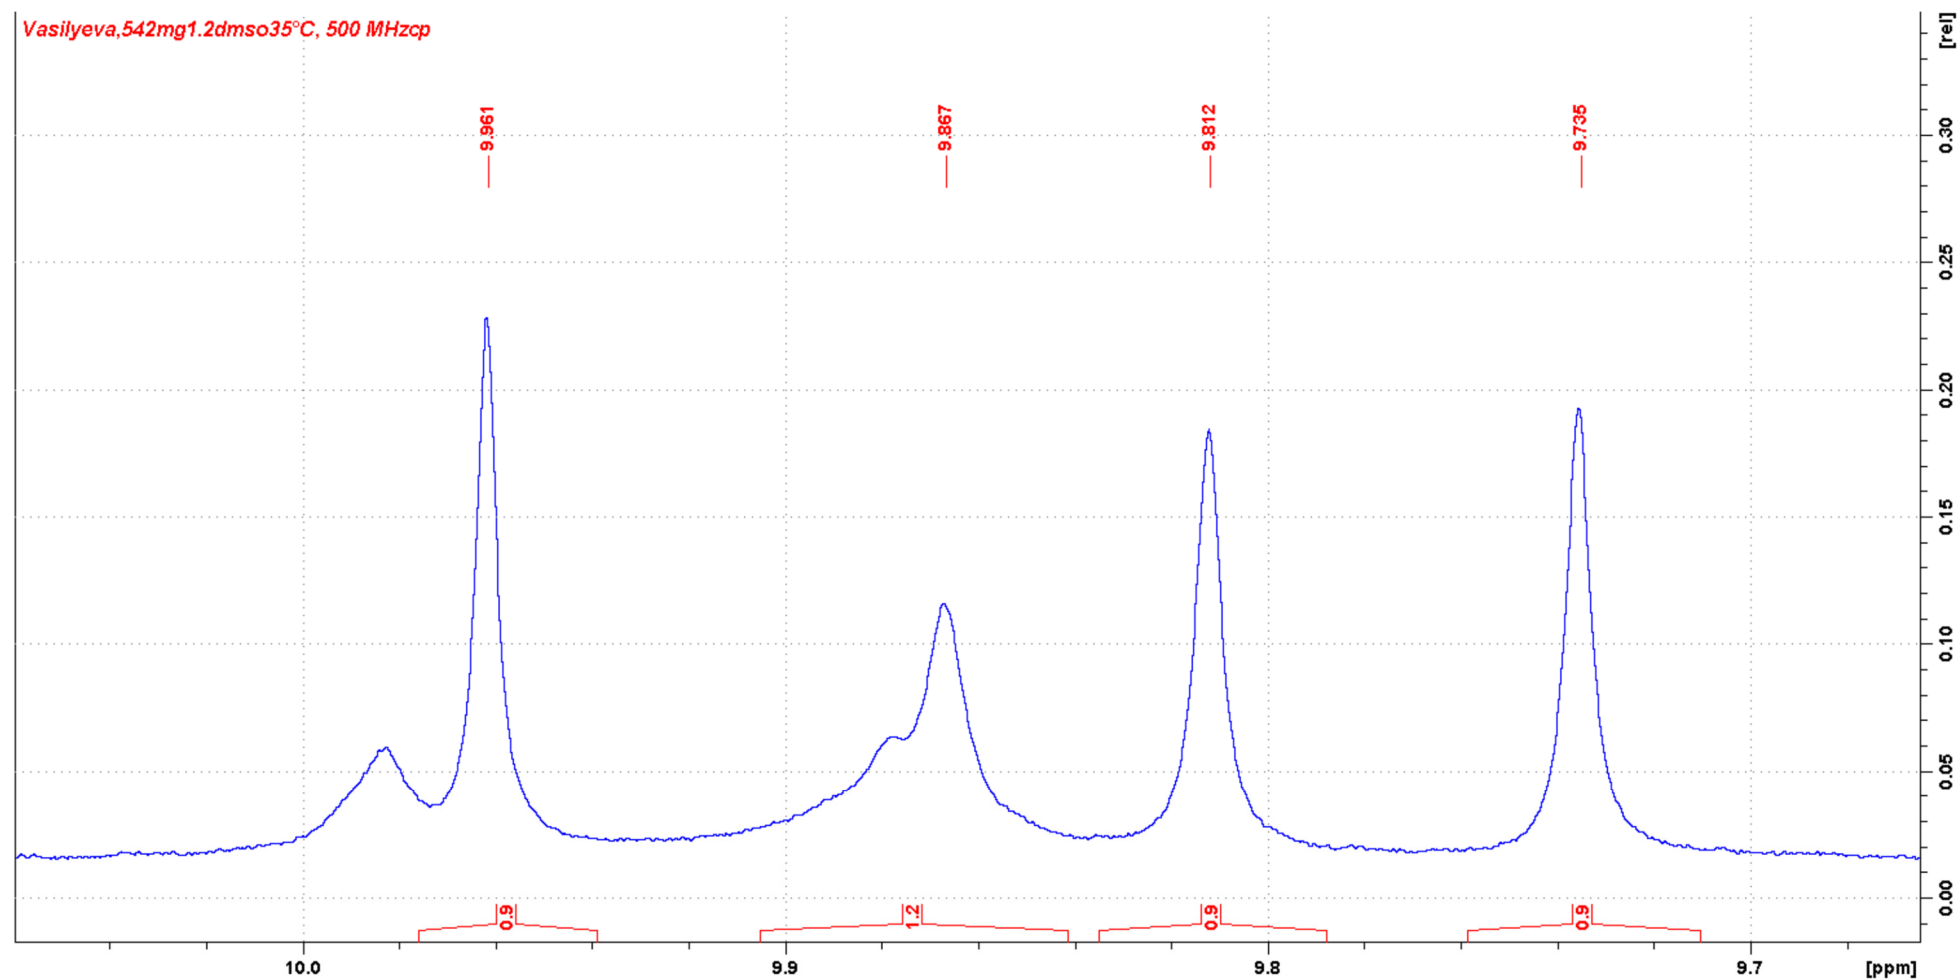

**Figure S38.** Enlarged fragment of  $^1\text{H}$  NMR spectrum of **3** ( $\text{DMSO}-d_6$ , 500 MHz)

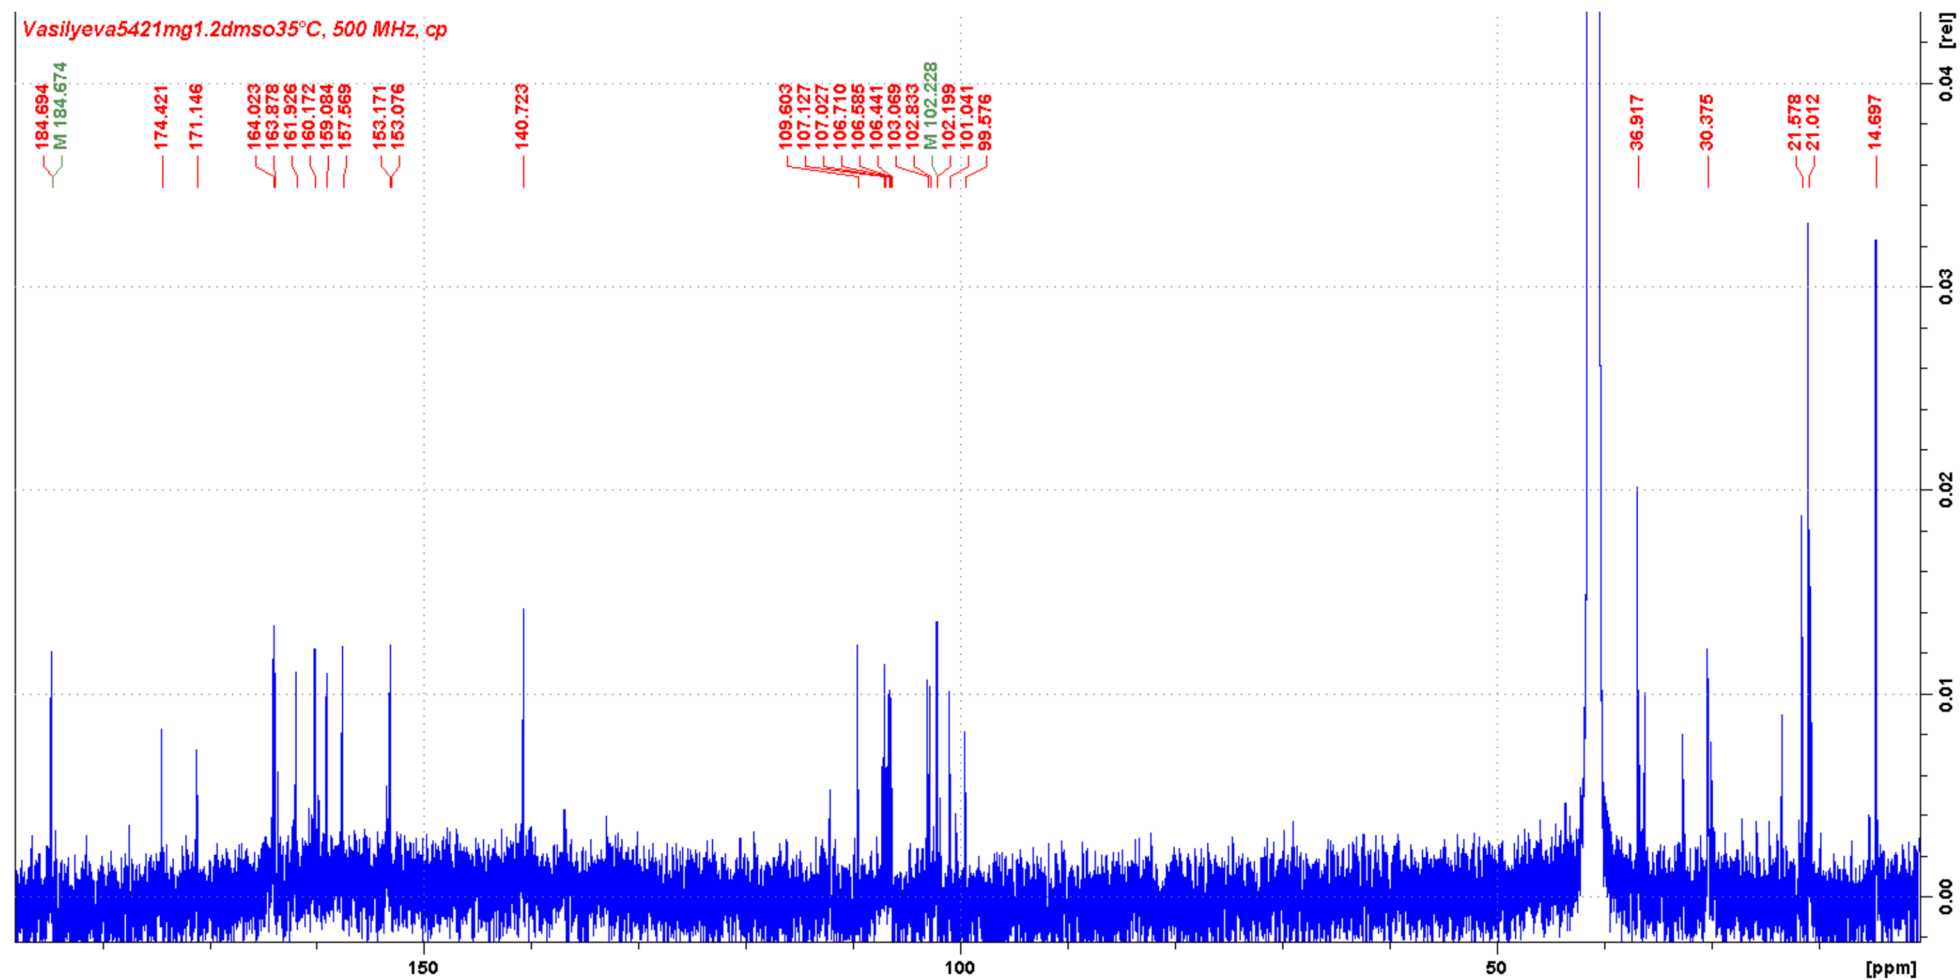

Figure S39.  $^{13}\text{C}$  NMR spectrum of **3** ( $\text{DMSO-}d_6$ , 126 MHz)

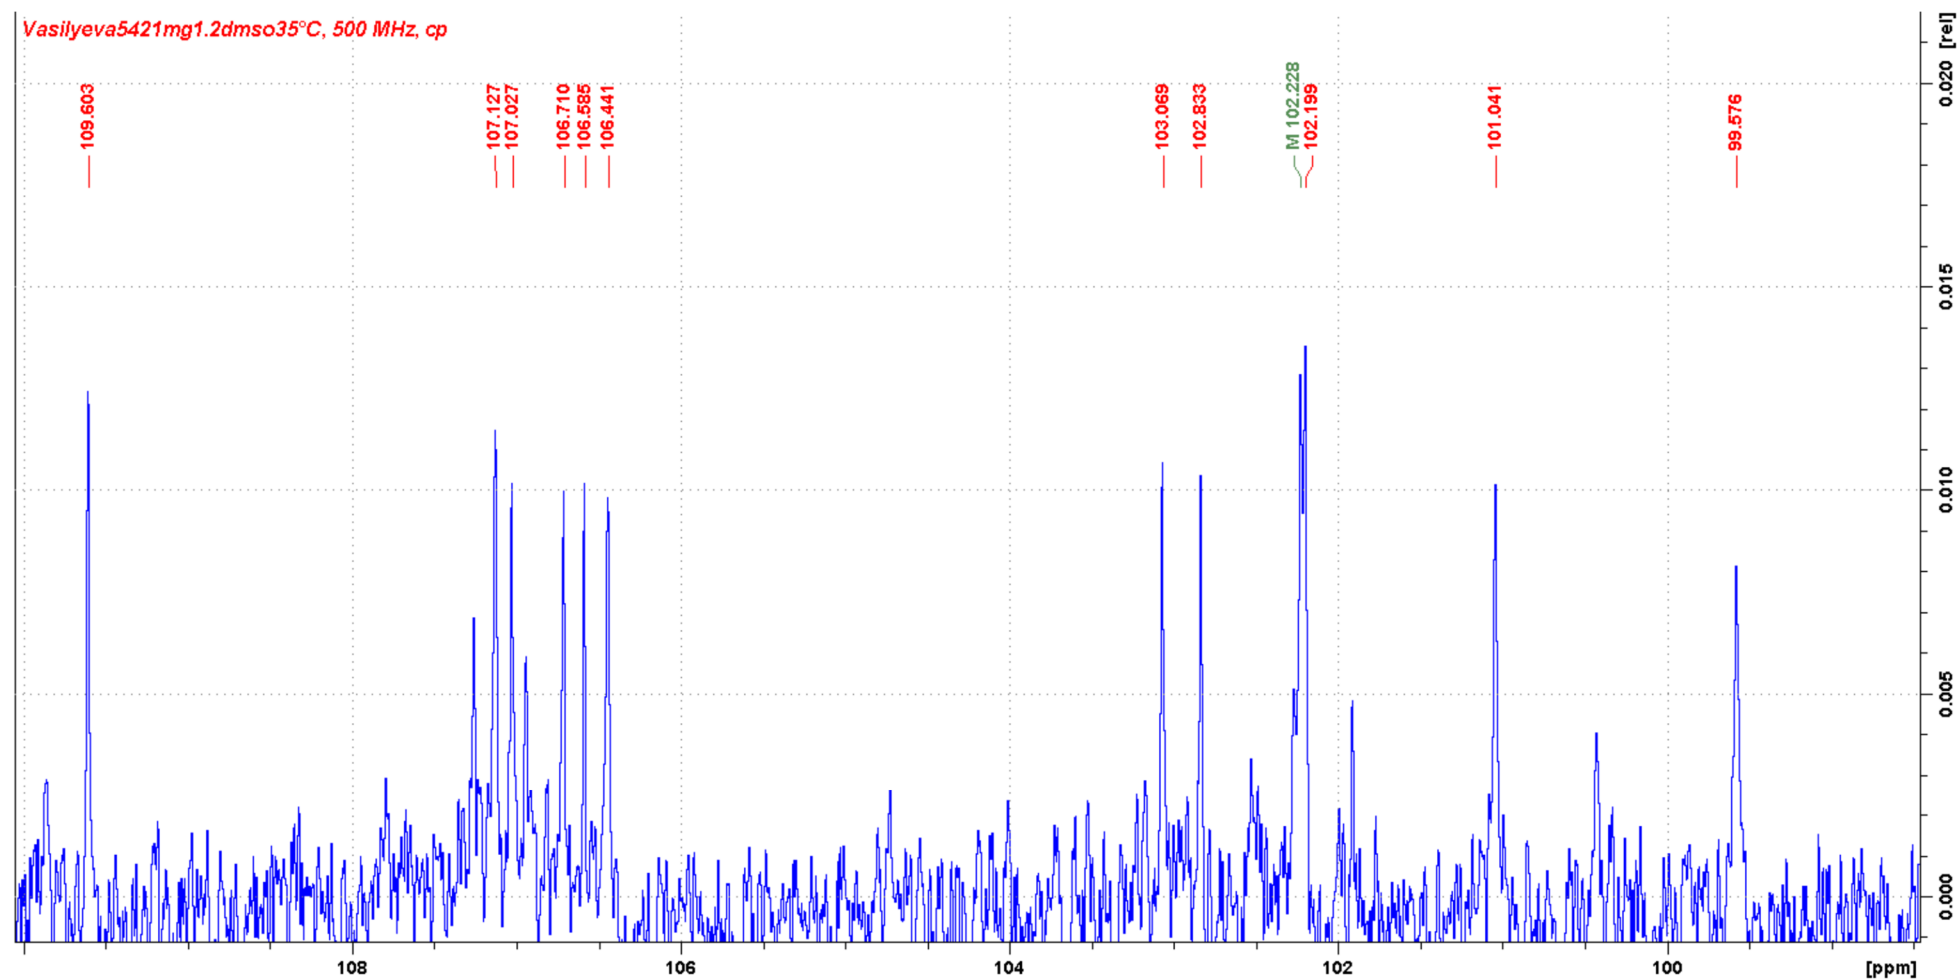

**Figure S40.** Enlarged fragment of  $^{13}\text{C}$  NMR spectrum of **3** ( $\text{DMSO-}d_6$ , 126 MHz)

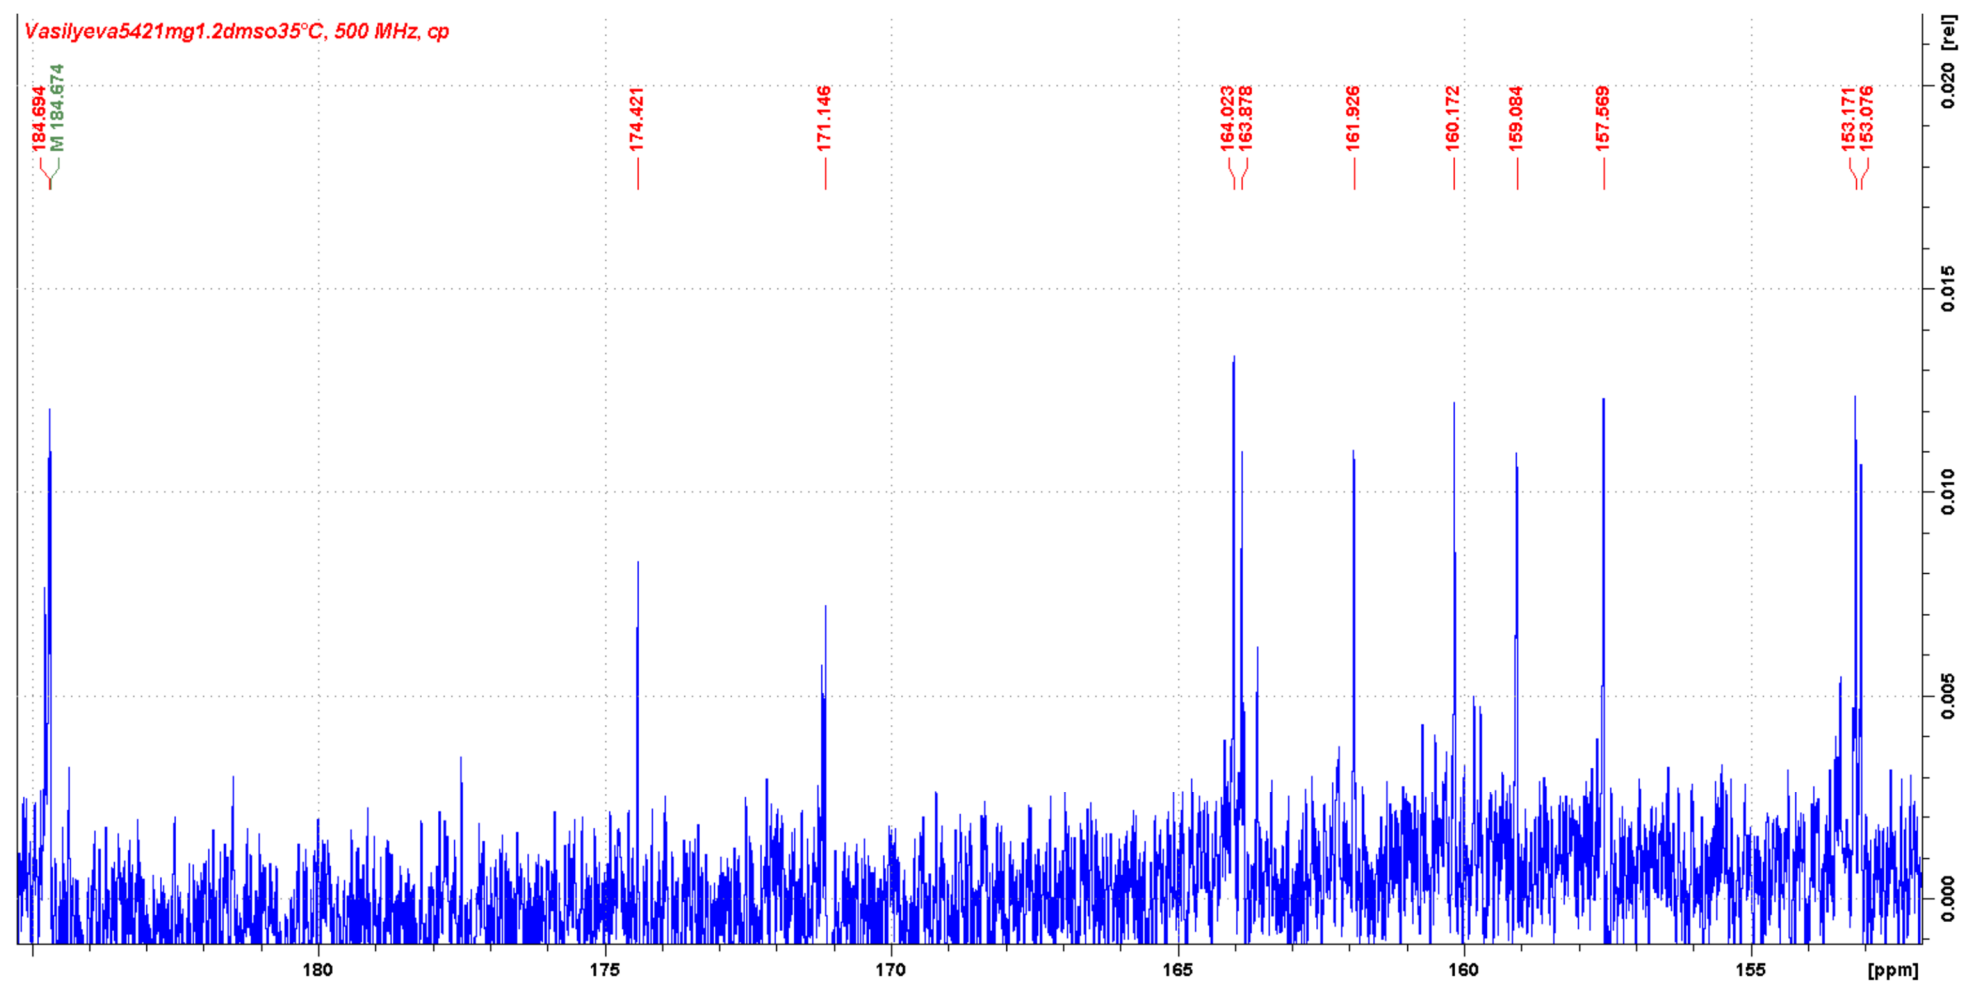

**Figure S41.** Enlarged fragment of  $^{13}\text{C}$  NMR spectrum of **3** ( $\text{DMSO}-d_6$ , 126 MHz)

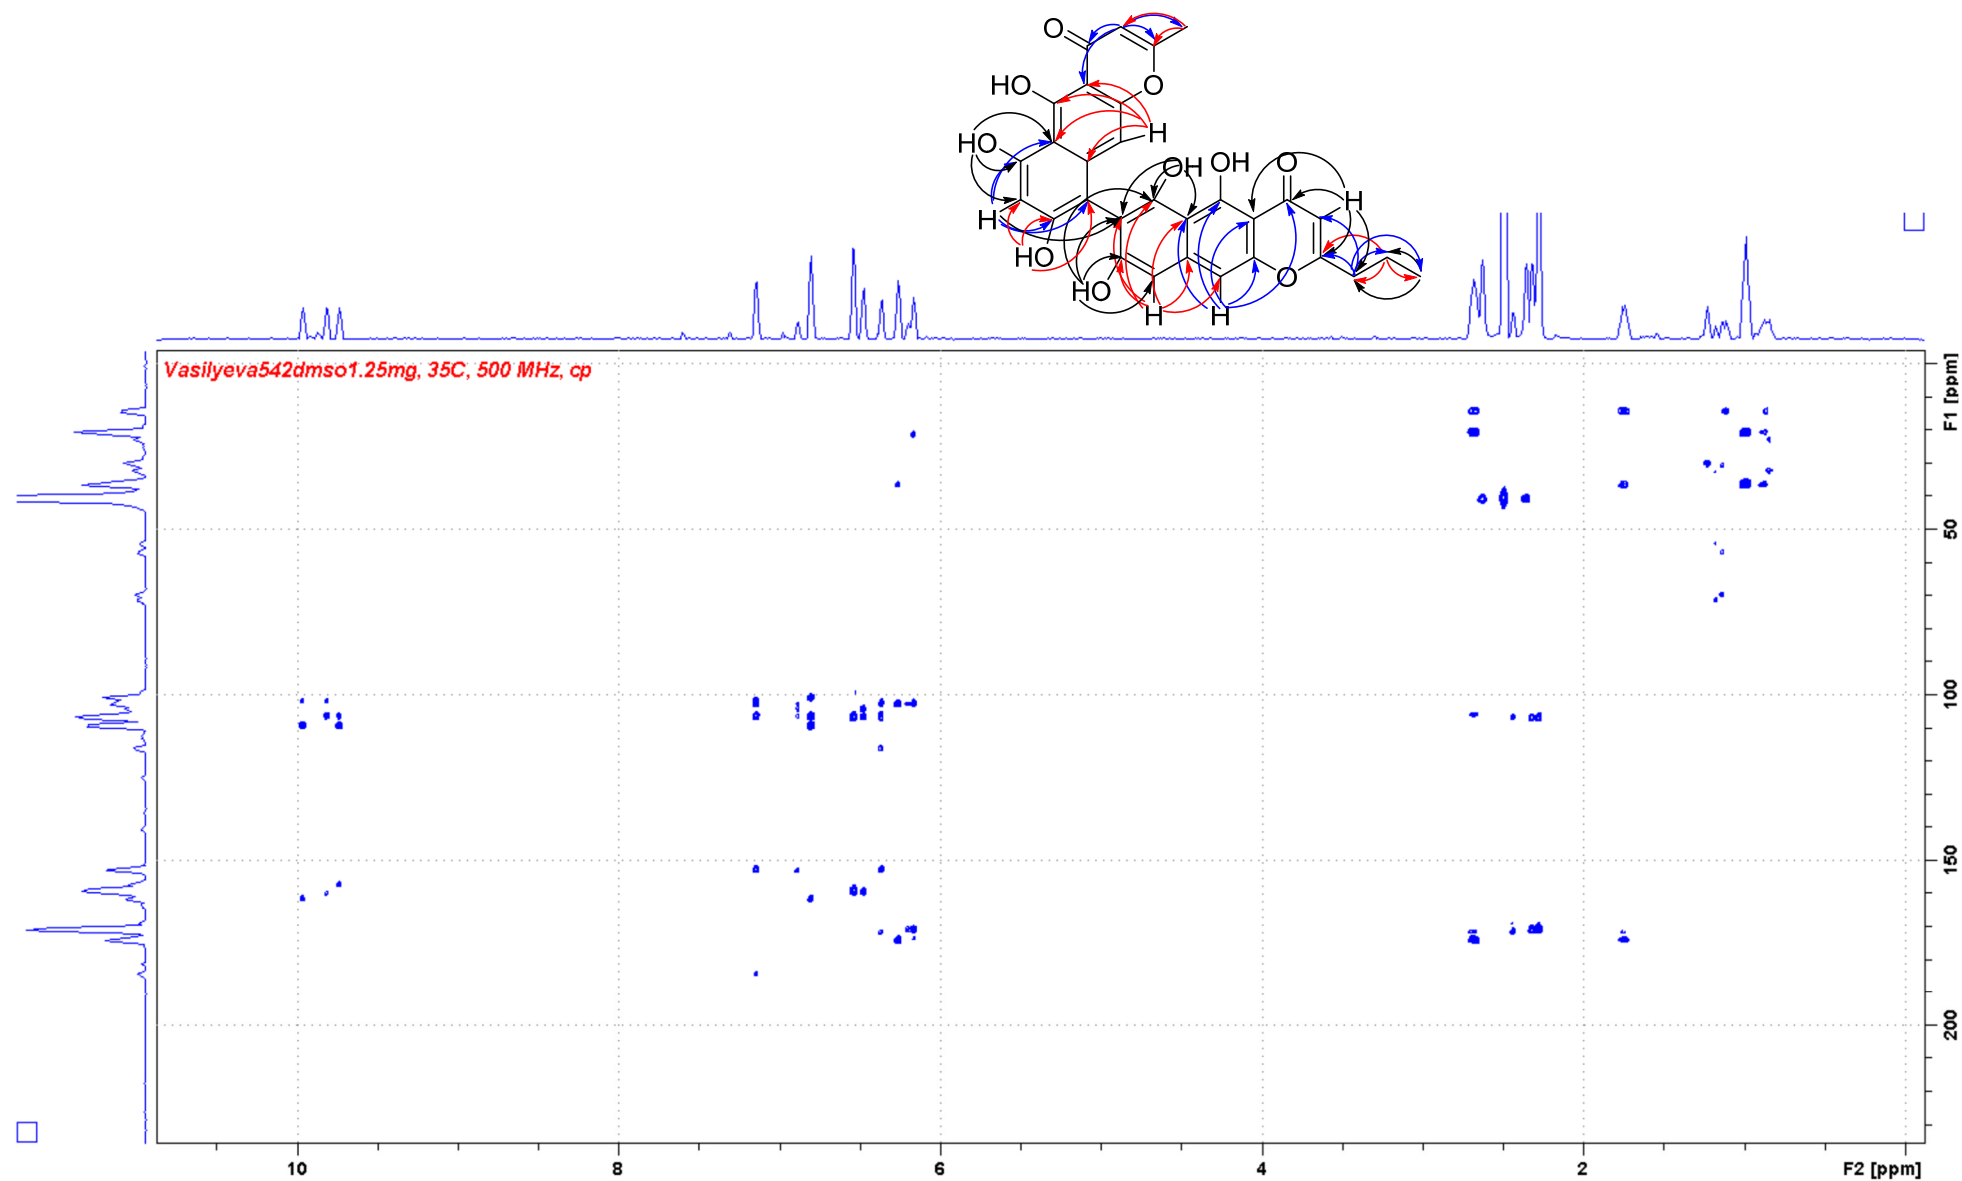

Figure S42. HMBC spectrum of 3

Datafile Name:Soda CH3Cl\_01.lcd  
Sample Name:V32 fr 18-22 Soda CH3Cl

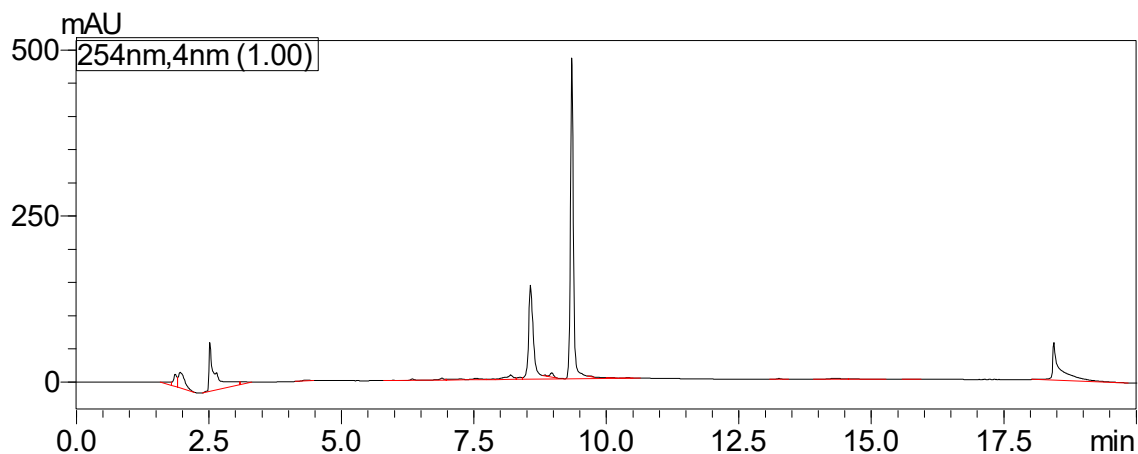

**Figure S43.** HPLC profile of compound 1 after purification using  $\text{Na}_2\text{CO}_3$  – compound 4 was derived

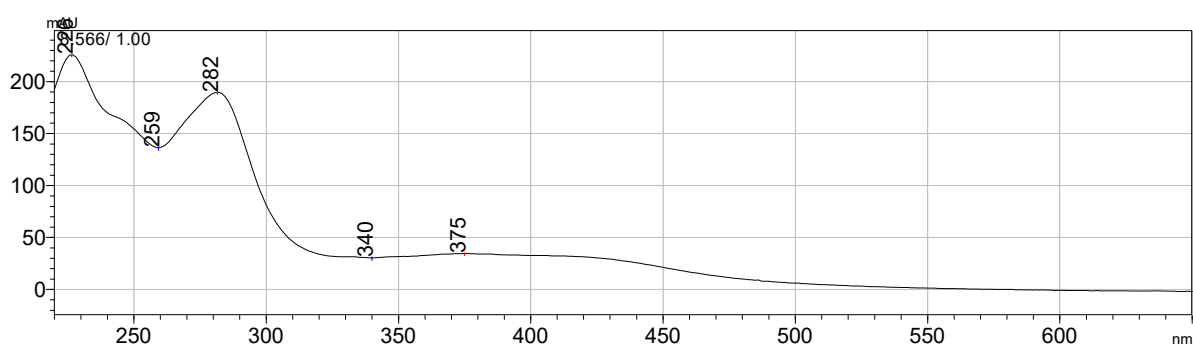

**Figure S44.** Absorption spectrum of compound 4 (DAD)

Scan(E-) Ret. Time : [8.633] Scan# : [1037]

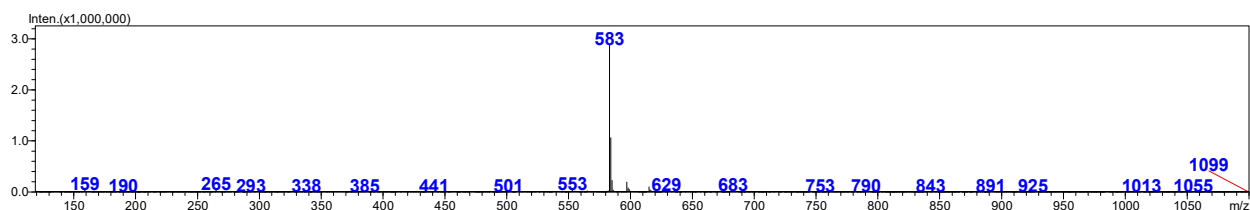

Scan(E+) Ret. Time : [8.641] Scan# : [1038]

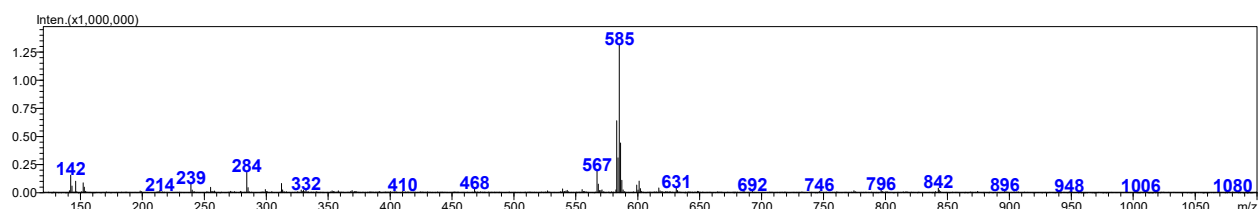

**Figure S45.** MS data of compound 4



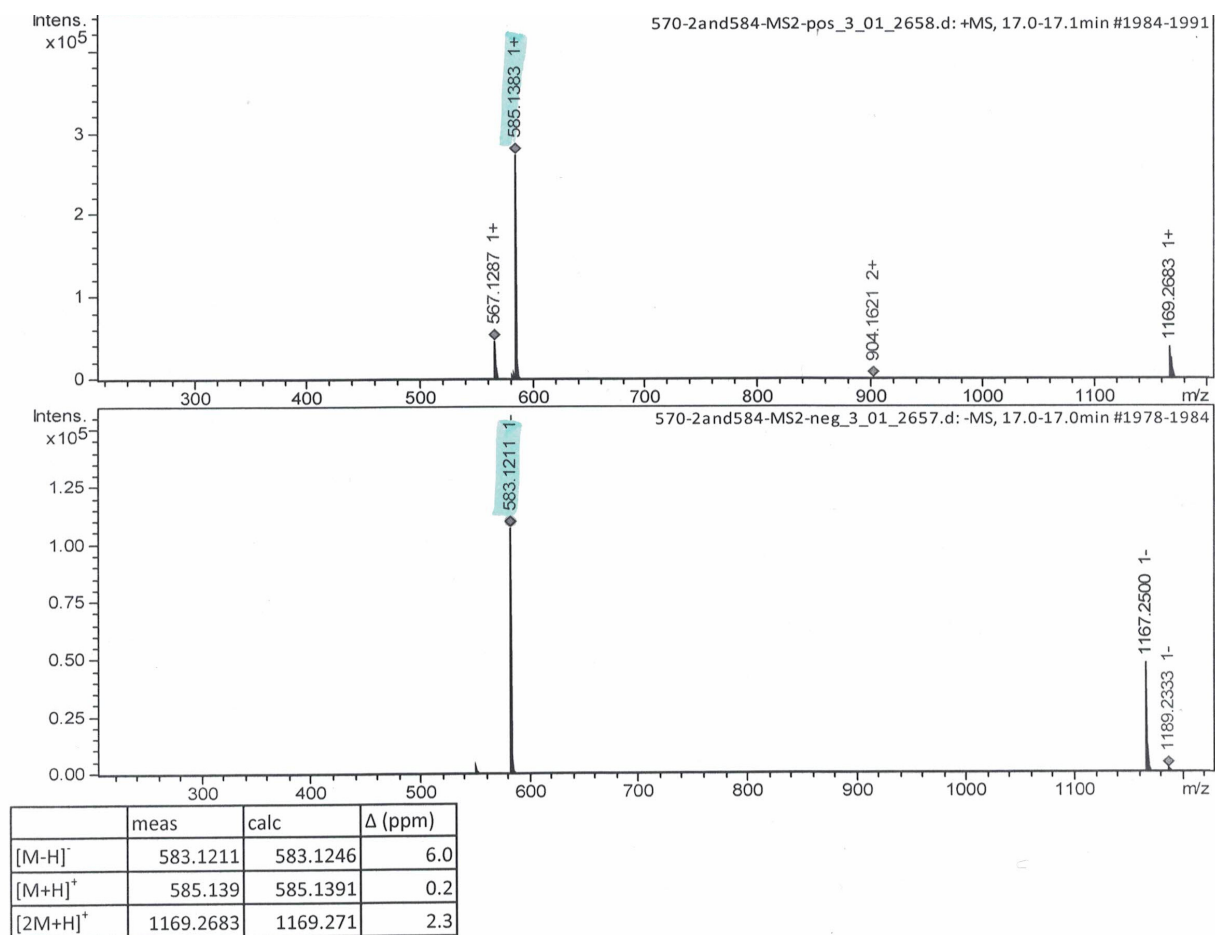

**Figure S46.** HRESIMS data of compound **4**

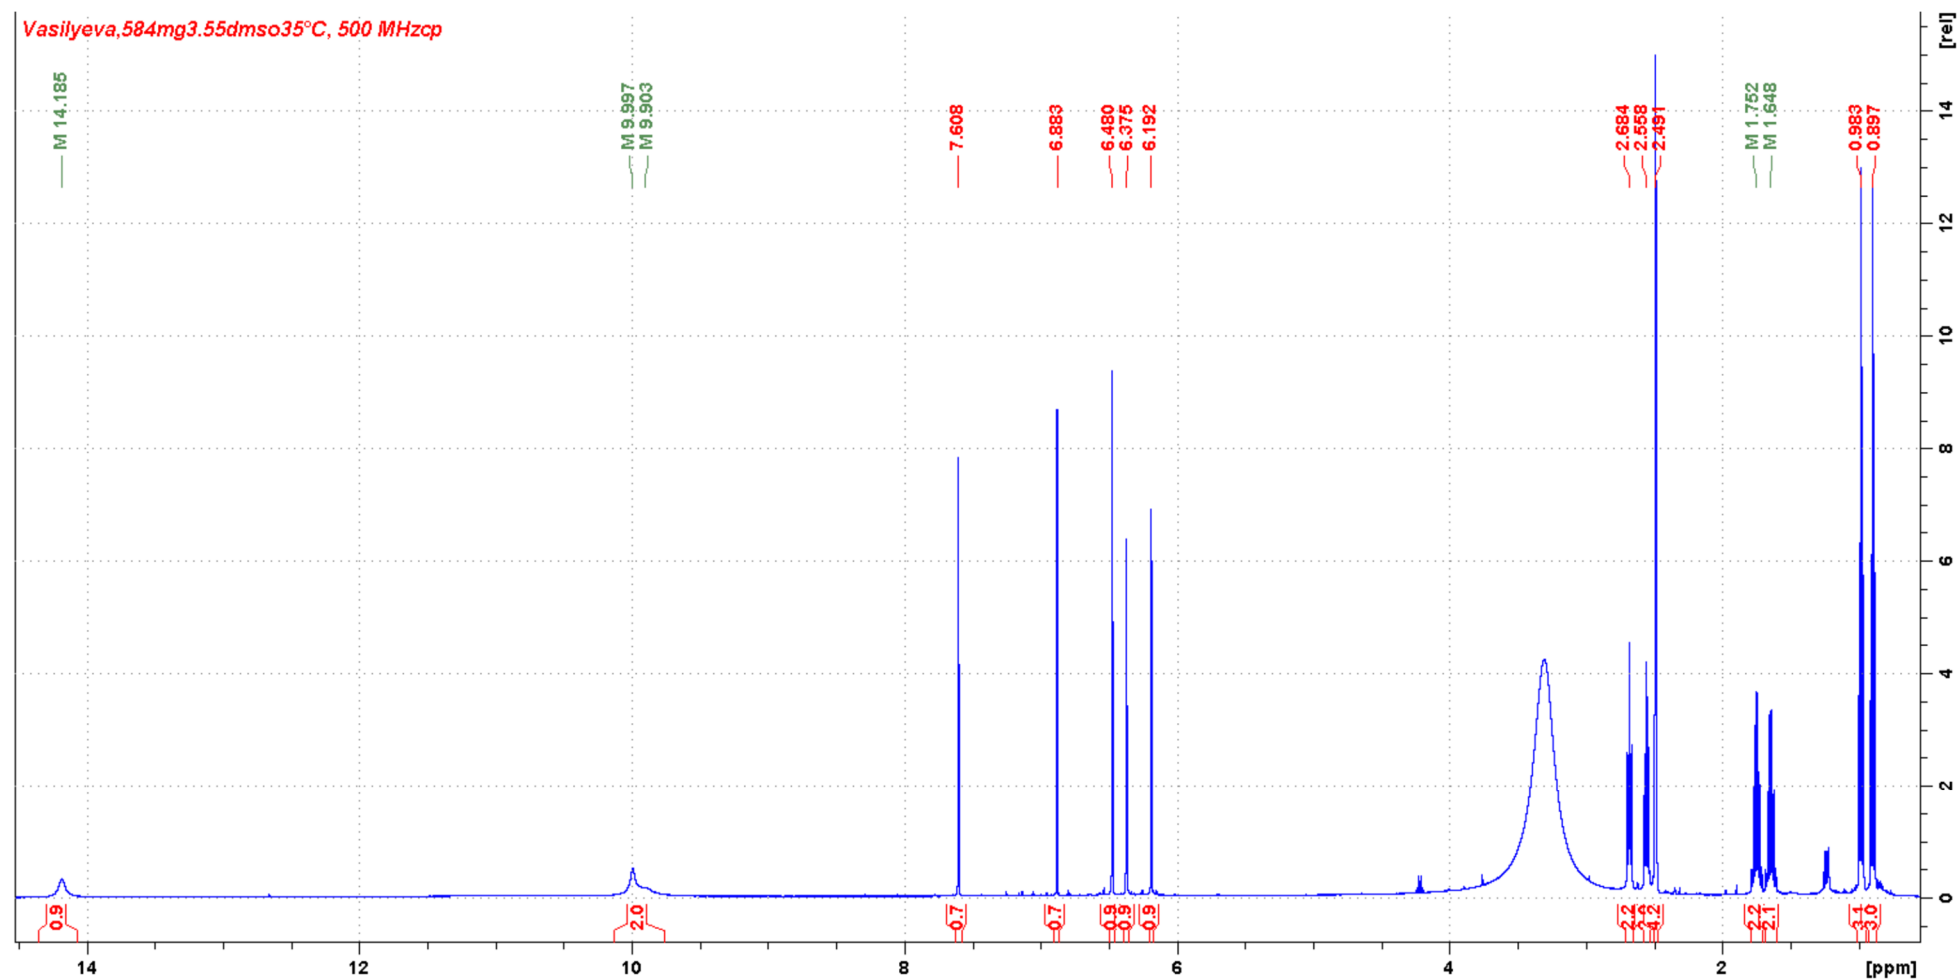

Figure S47.  $^1\text{H}$  NMR spectrum of **4** (DMSO- $d_6$ , 500 MHz)

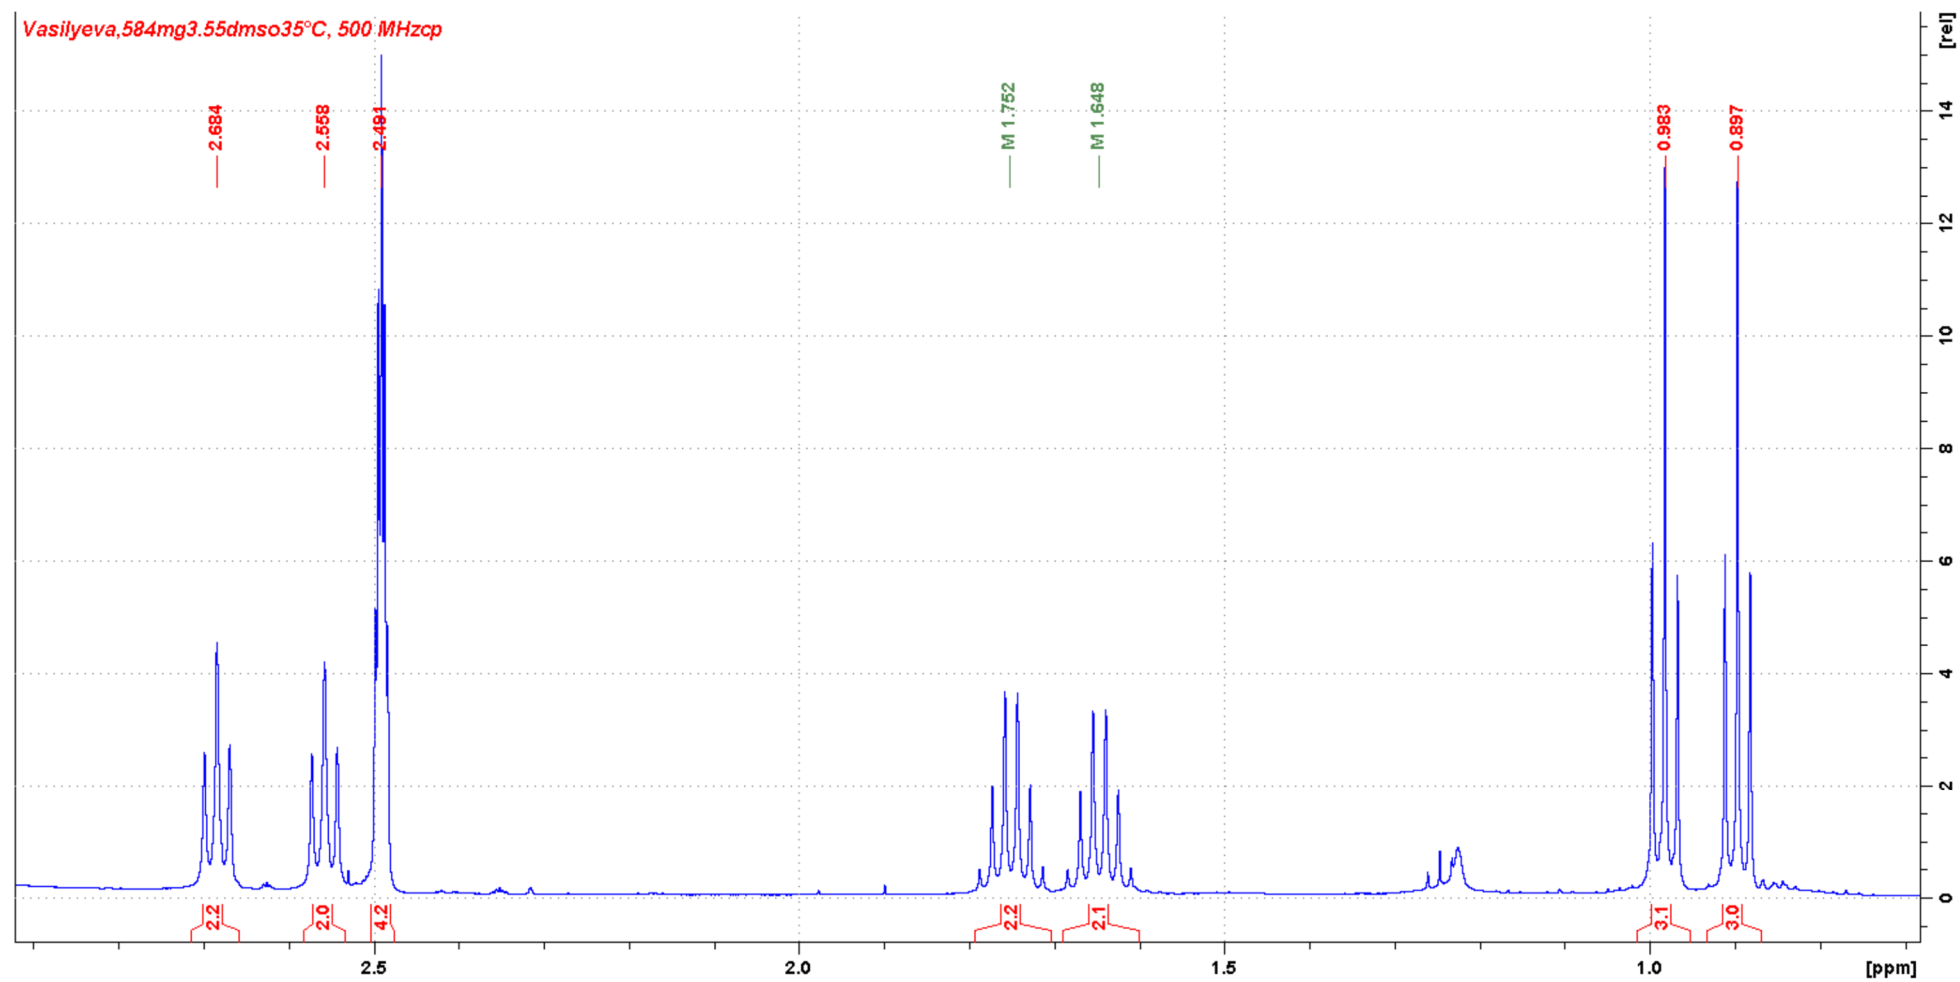

Figure S48. Enlarged fragment of  $^1\text{H}$  NMR spectrum of **4** ( $\text{DMSO-}d_6$ , 500 MHz)

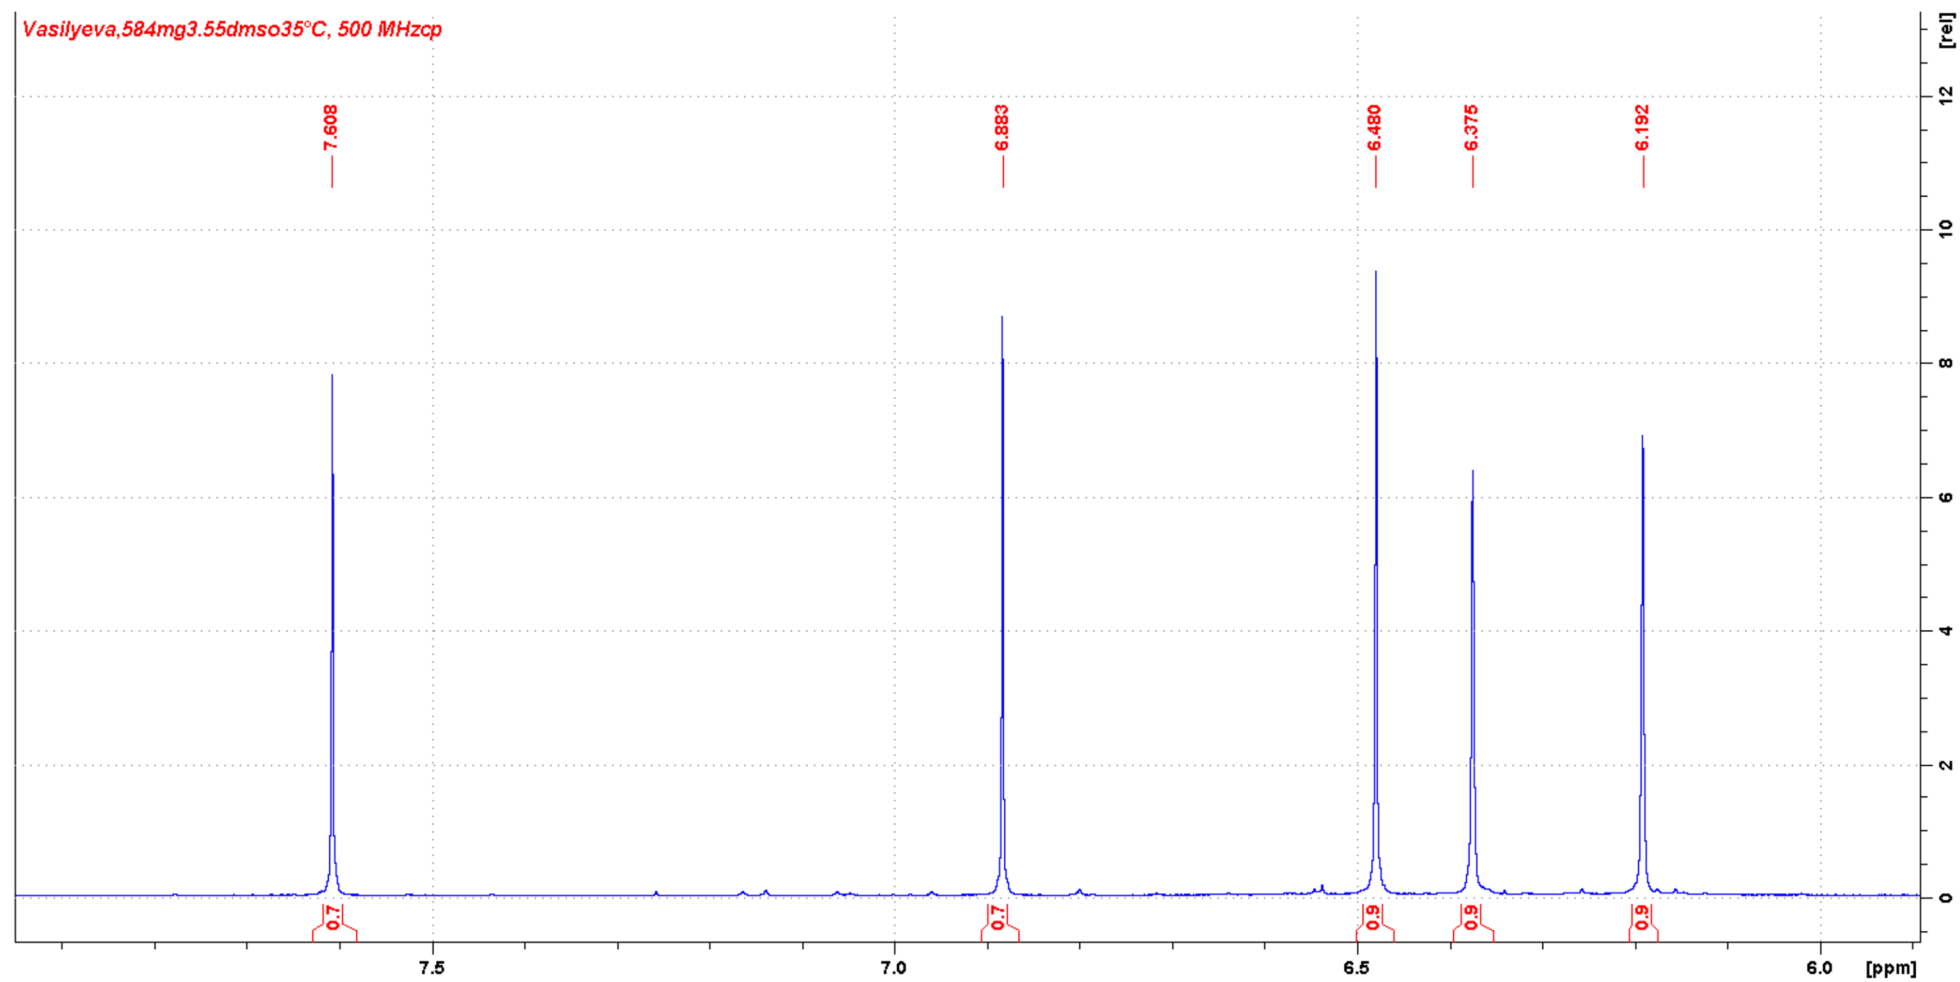

**Figure S49.** Enlarged fragment of  $^1\text{H}$  NMR spectrum of **4** (DMSO- $d_6$ , 500 MHz)

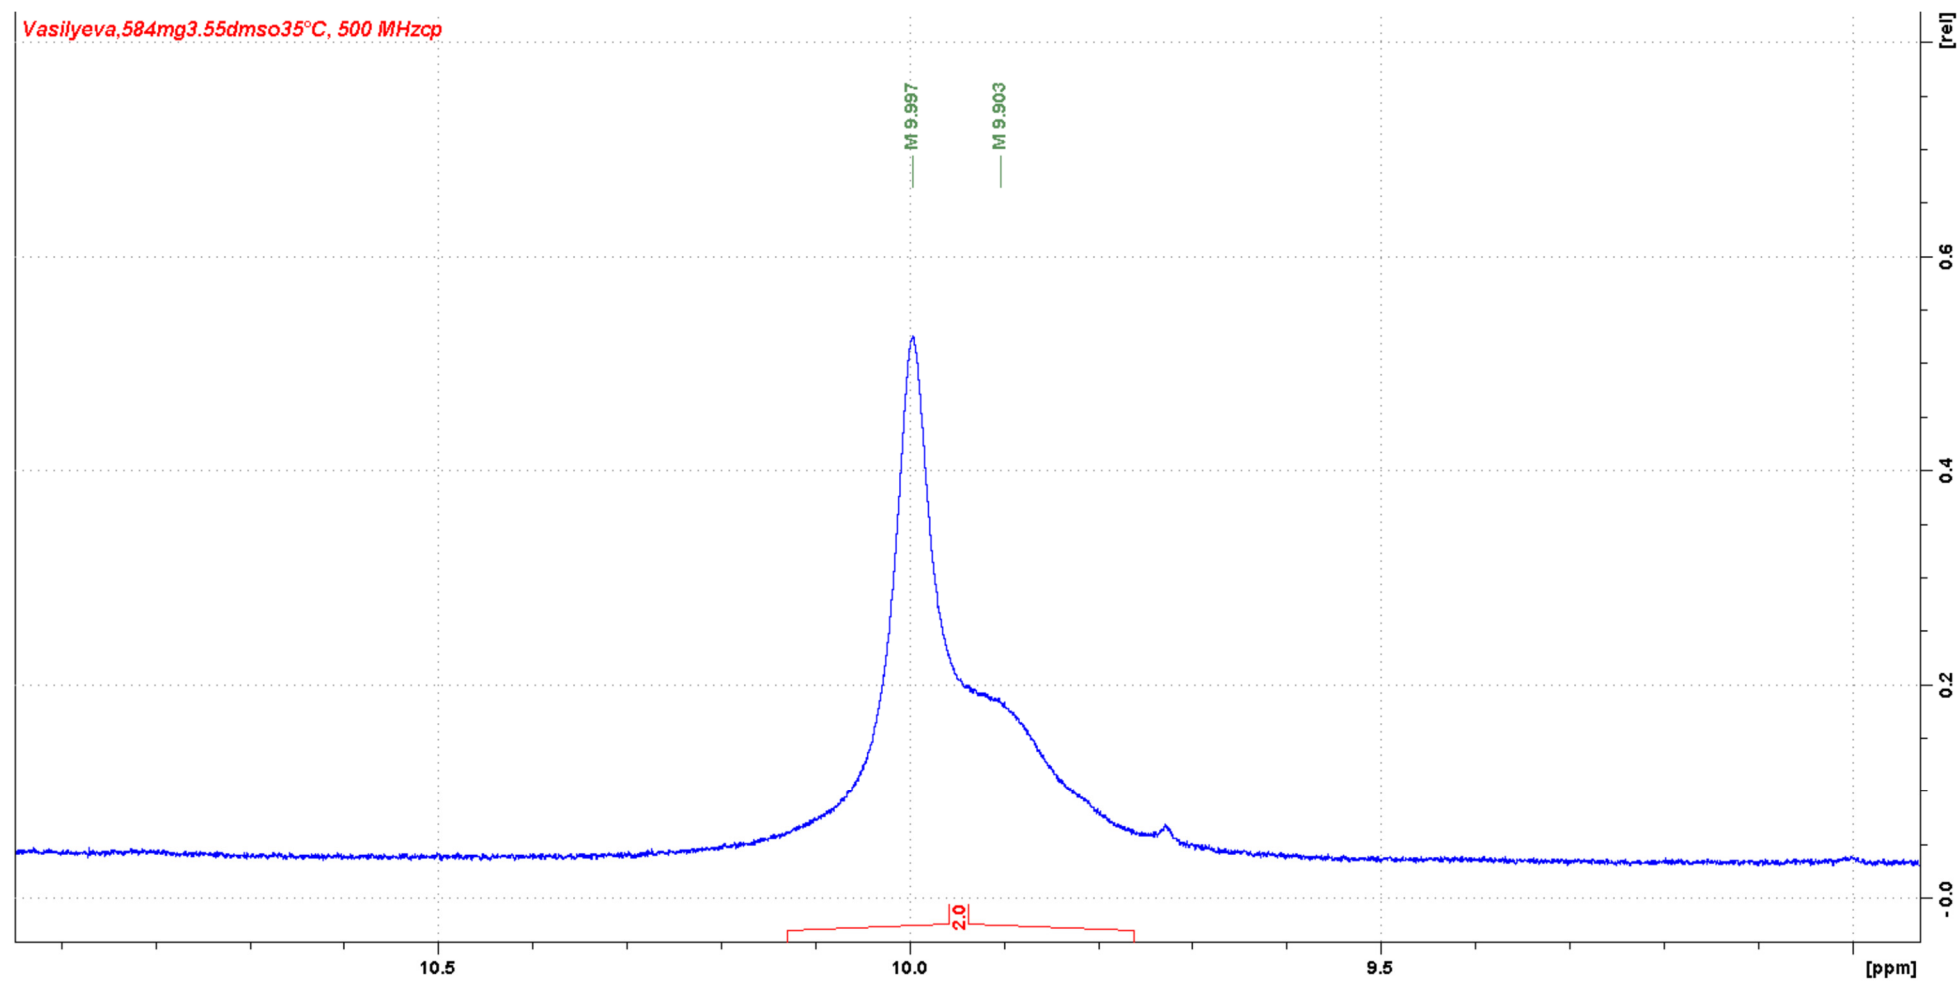

**Figure S50.** Enlarged fragment of  $^1\text{H}$  NMR spectrum of **4** (DMSO- $d_6$ , 500 MHz)

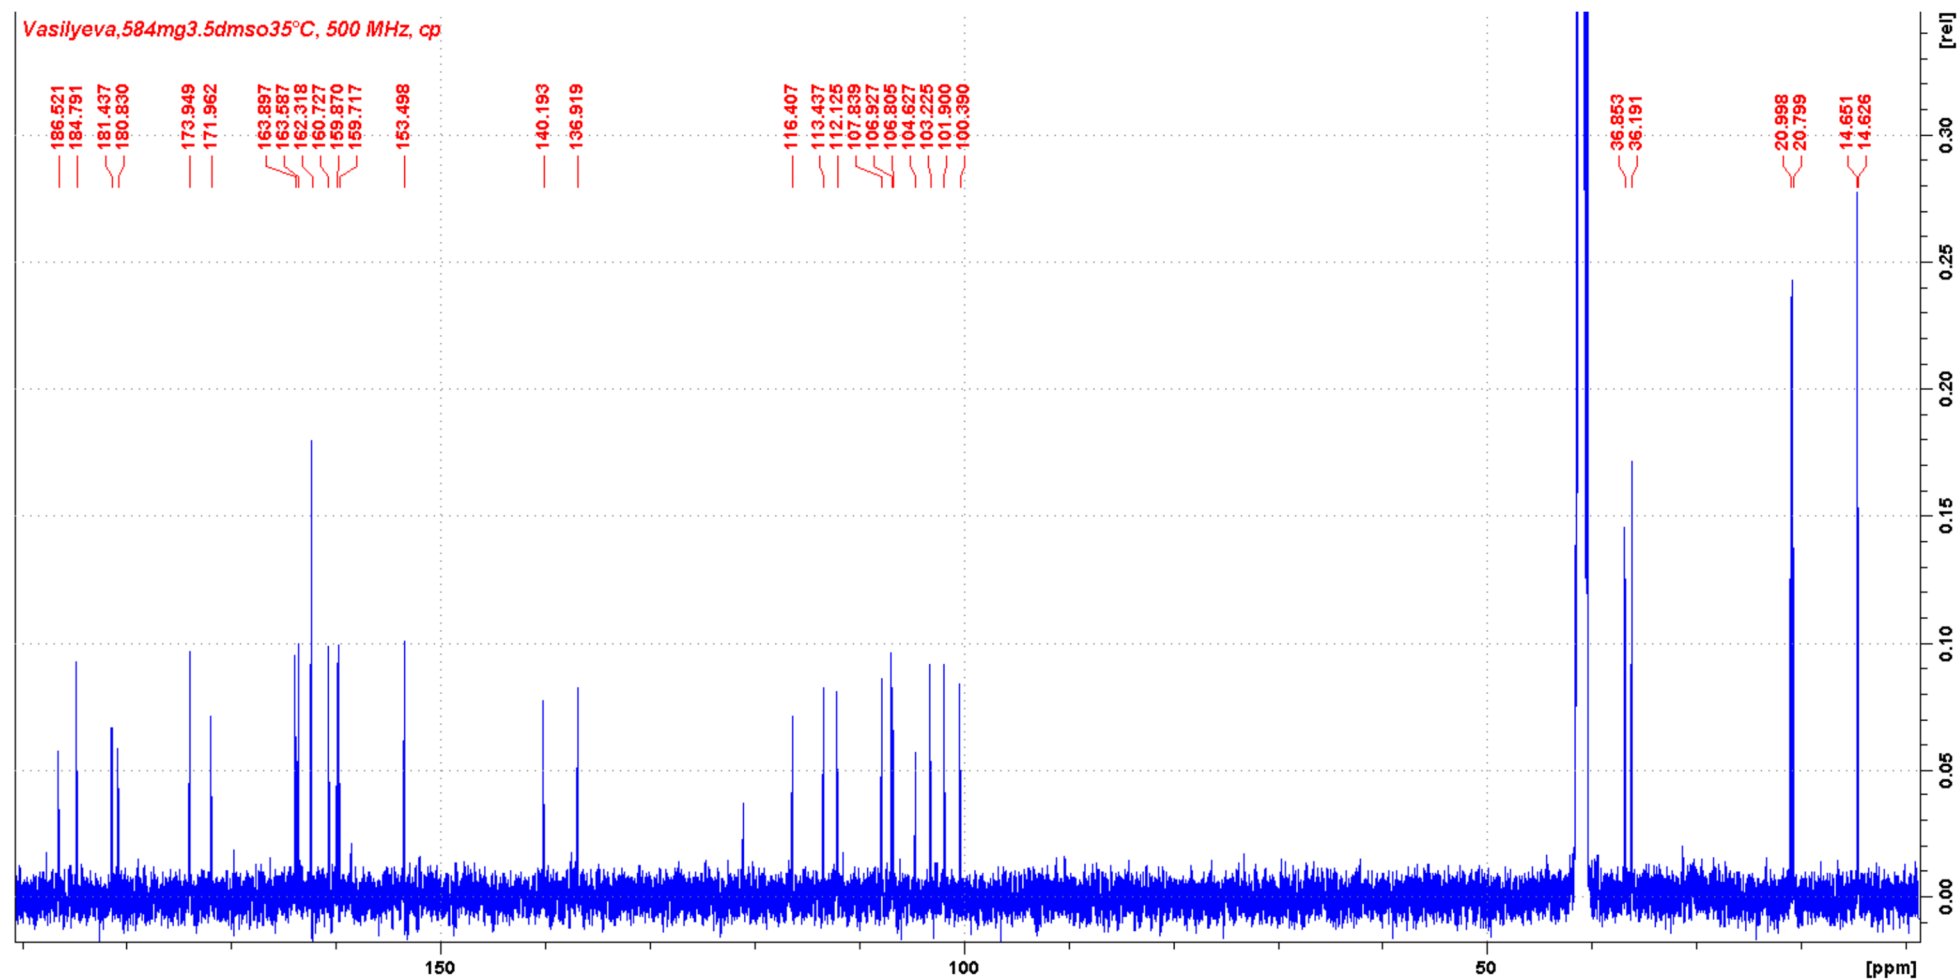

Figure S51.  $^{13}\text{C}$  NMR spectrum of **4** (DMSO- $d_6$ , 126 MHz)

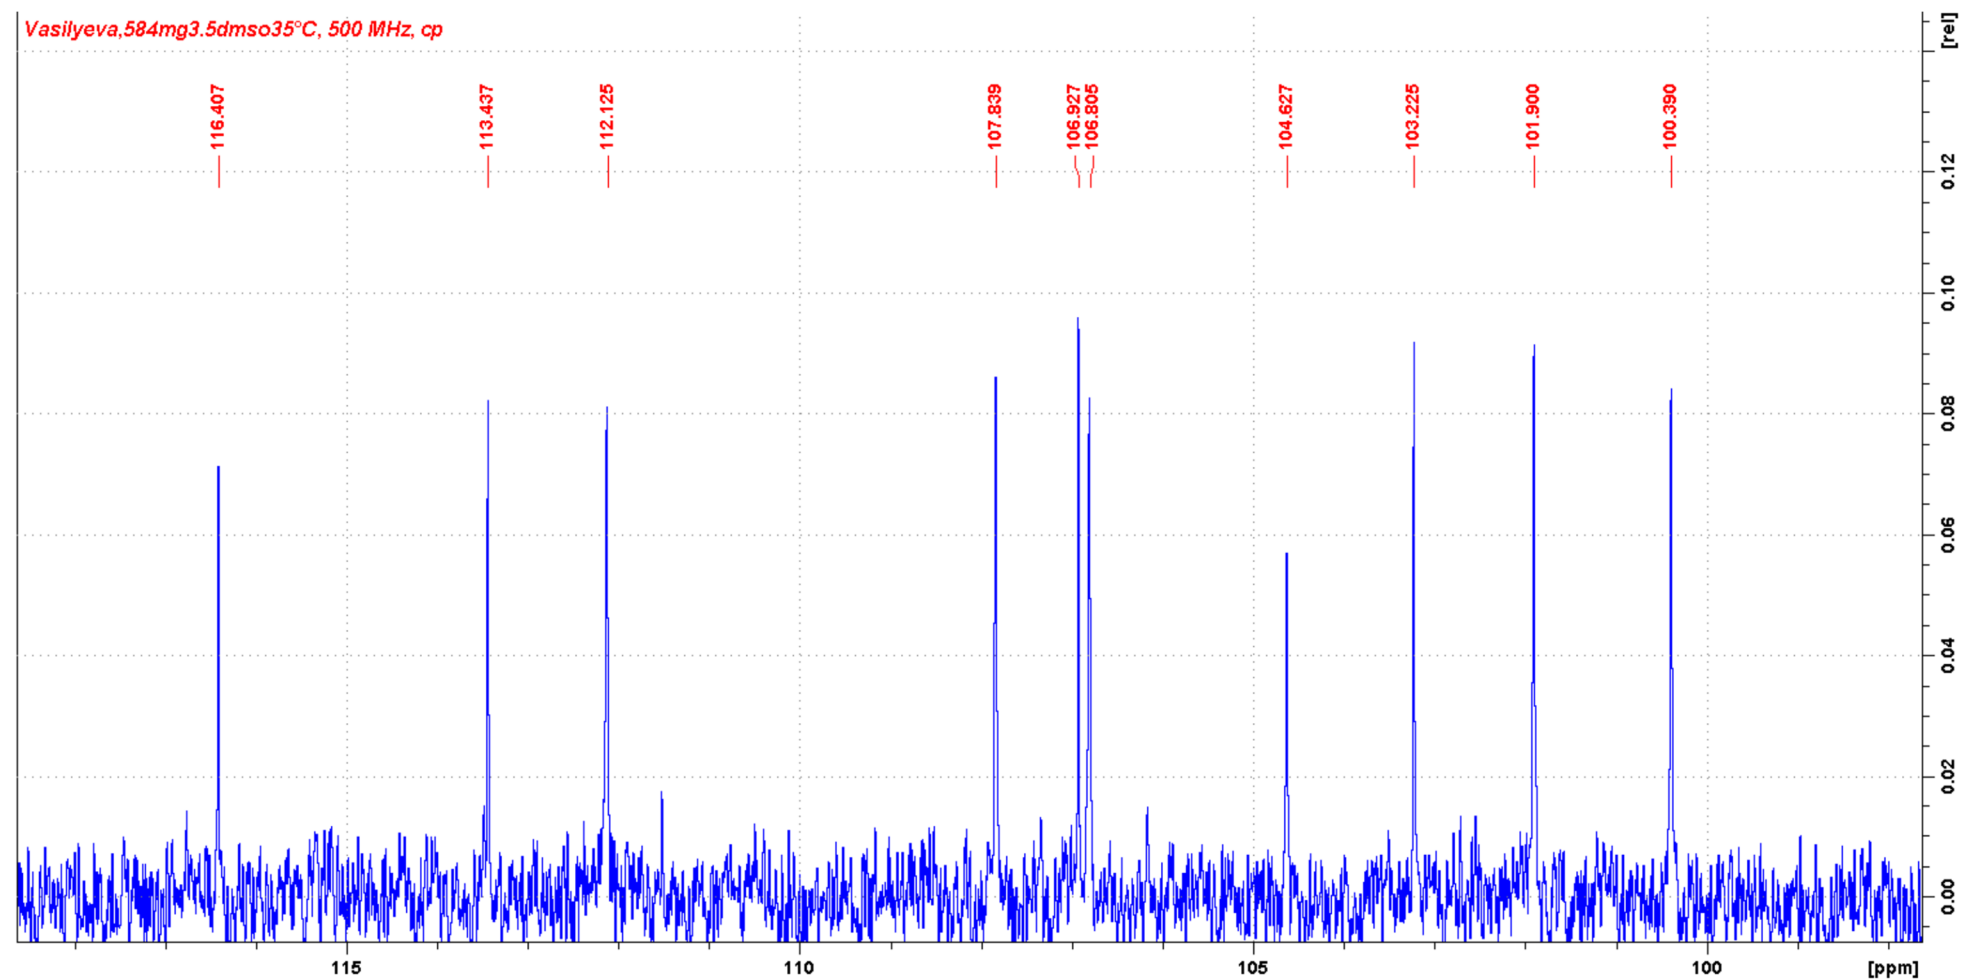

**Figure S52.** Enlarged fragment of  $^{13}\text{C}$  NMR spectrum of **4** ( $\text{DMSO}-d_6$ , 126 MHz)

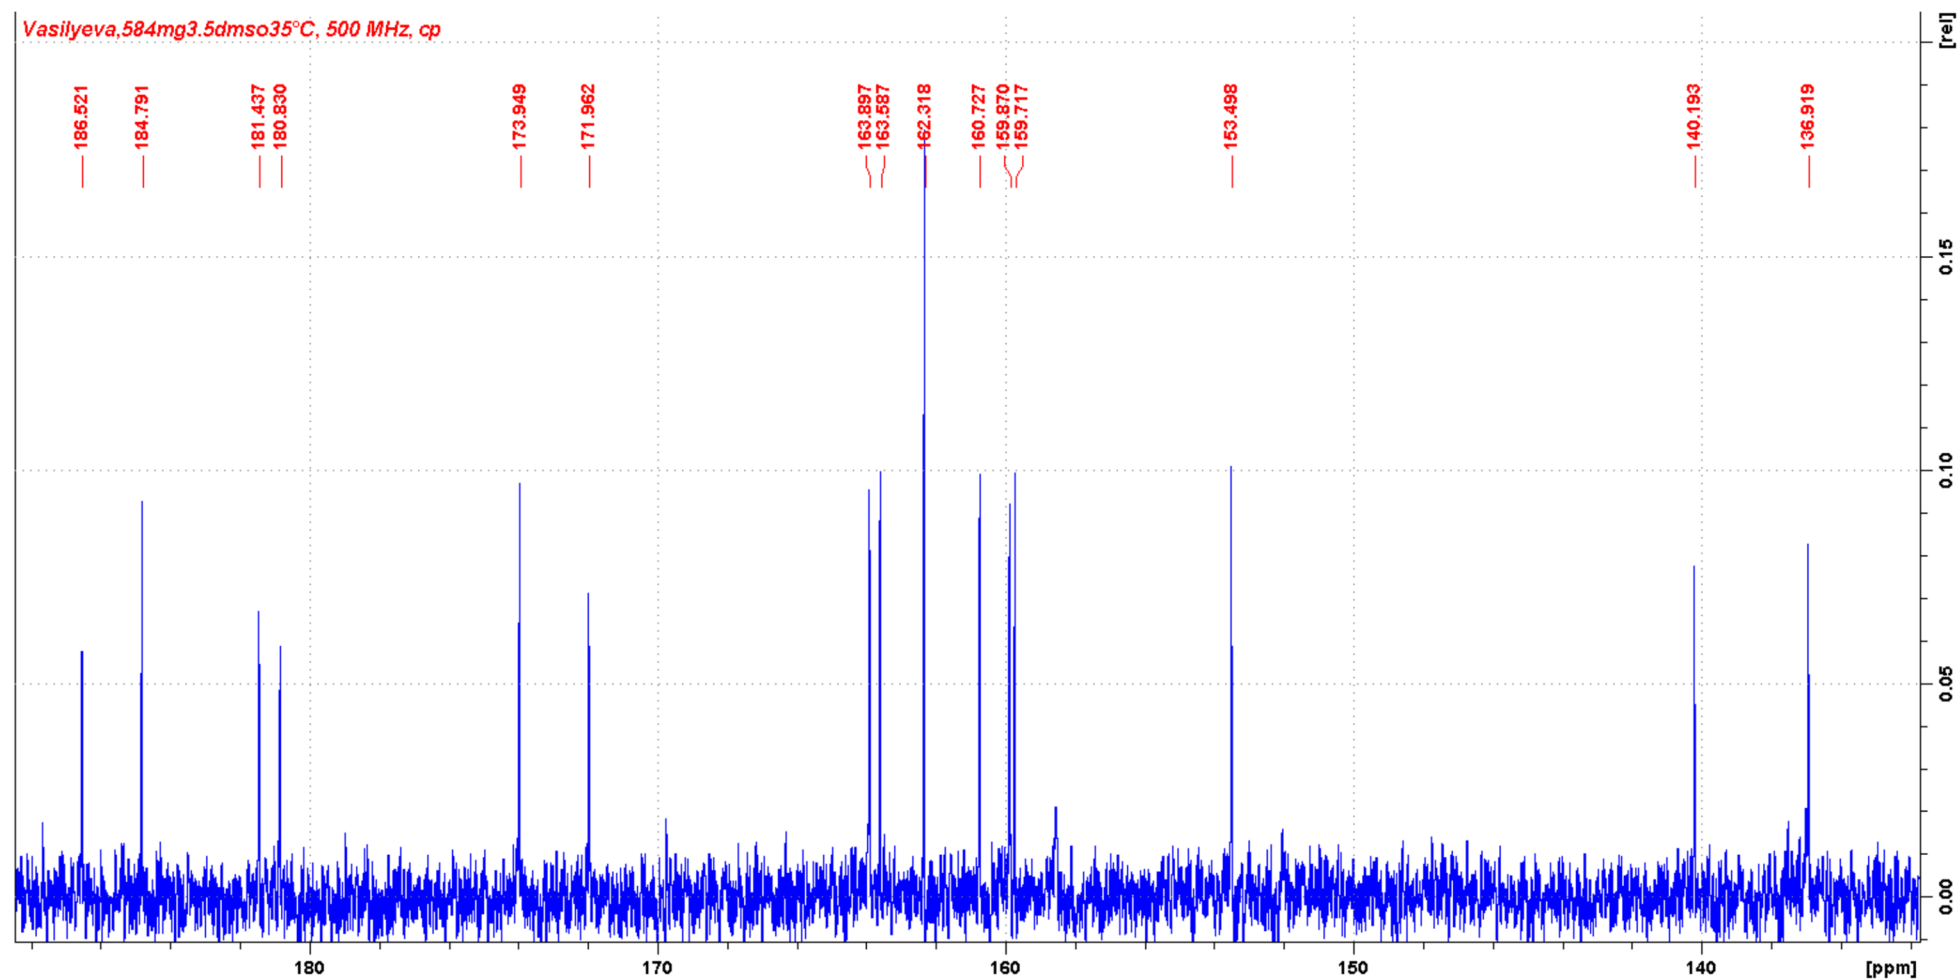

**Figure S53.** Enlarged fragment of  $^{13}\text{C}$  NMR spectrum of **4** ( $\text{DMSO}-d_6$ , 126 MHz)



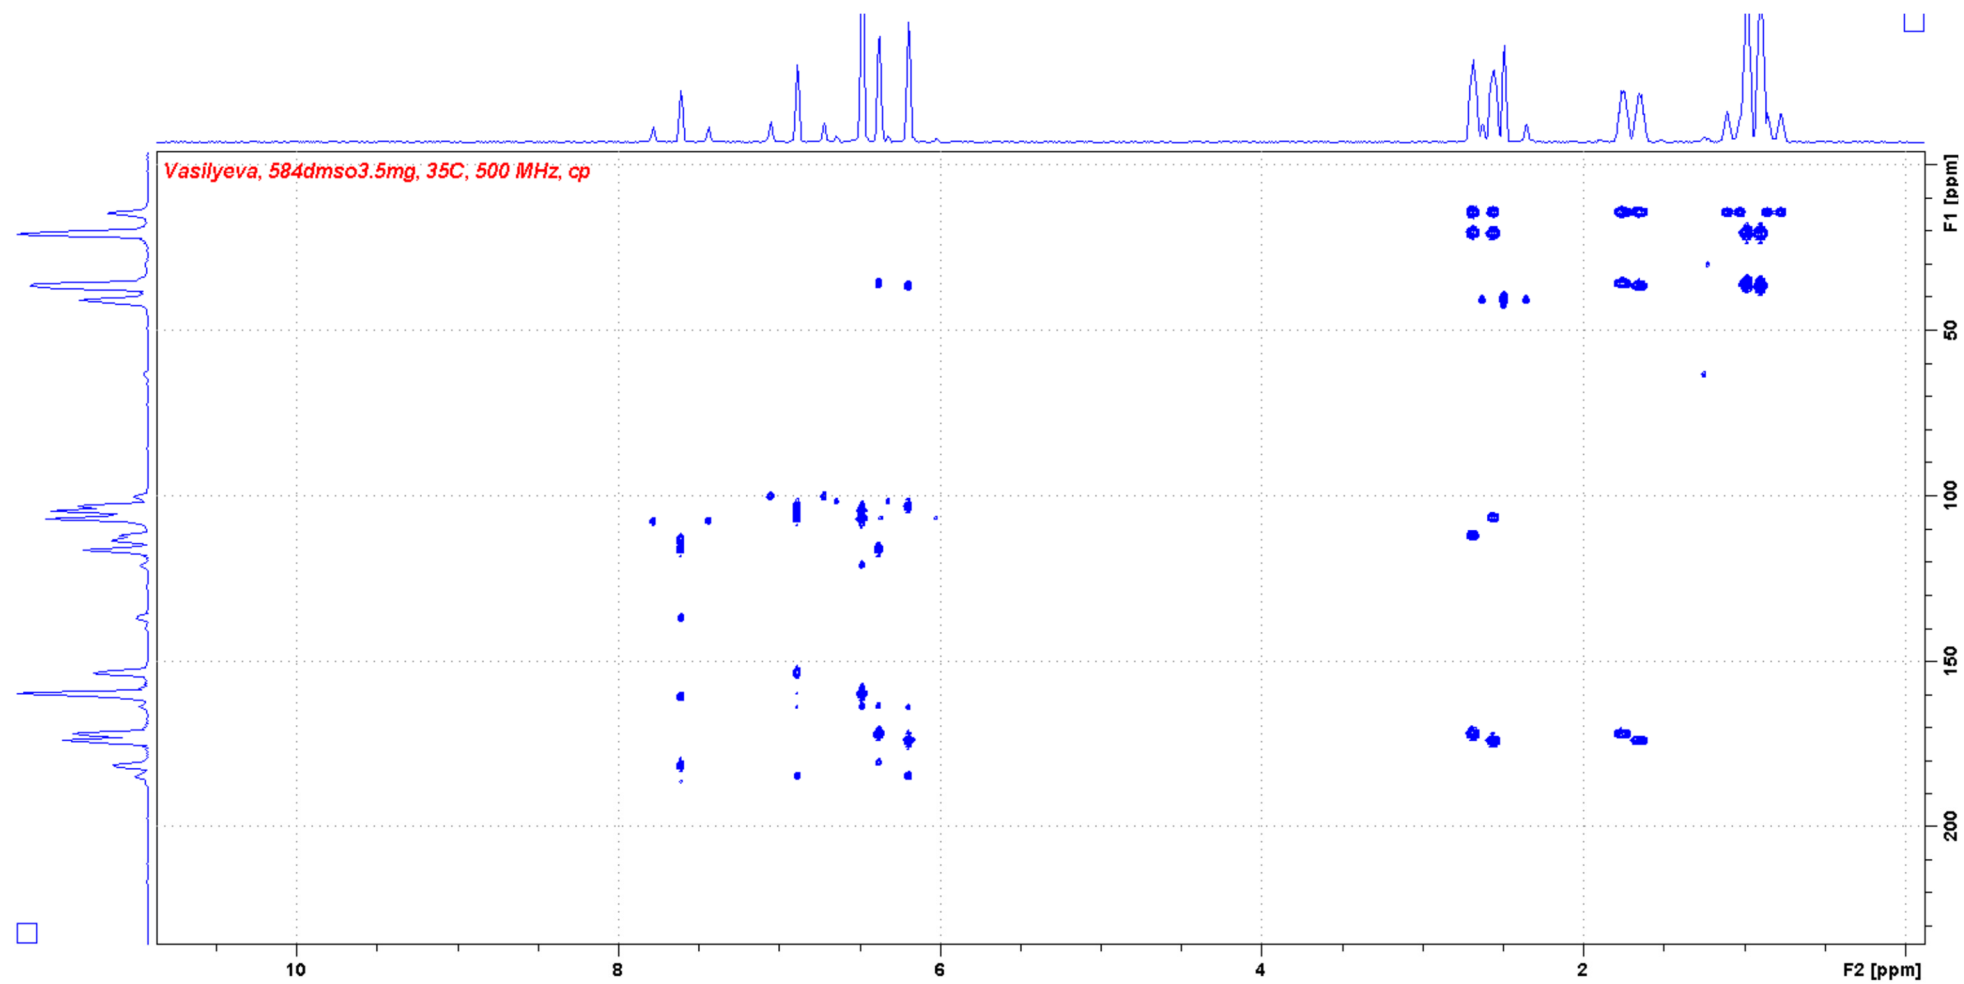

Figure S54. HMBC spectrum of **4** (DMSO- $d_6$ , 126 MHz)

### Investigation of interaction of compound 1 with recombinant cytochromes P450 using SPR analysis

The analysis was performed using the Biacore 8K SPR biosensor (Cytiva, USA). The resulting sensorgrams of interaction were processed using the Biacore Insight Evaluation software package Version 3.0.11.15423. For analysis, standard CM5 optical chips with carboxymethylated dextran on the gold surface (Cytiva, USA) were used. Ligands (molecules immobilized on the surface of the optical chip of the biosensor): recombinant cytochromes P450 of *Mycobacterium tuberculosis* (CYP51, CYP124, CYP125, CYP126, CYP142), *Candida albicans* (CYP51), *Candida glabrata* (CYP51), *Homo sapiens* (CYP51);

Activation of the surface of the working channel was carried out by injection of an activating mixture of 50% EDC / 50% NHS for 7 minutes at a flow rate of 5  $\mu$ L/min. Injection of a solution of ligands (studied CYPs) in immobilization buffer (10 mM sodium acetate, pH 4.5 in the case of CYP51 *Candida albicans* and *Candida glabrata*; 10 mM sodium acetate, pH 5.0 in the case of all other CYPs) was carried out for 5 min at flow rate 5  $\mu$ L/min. After this, the chip was incubated for 1 hour in a docked state in the “Stand By” device mode at a measuring cell temperature of 25°C, which led to the hydrolysis of unreacted activated dextran groups. The amount of the protein immobilized on the chip is given in the Table S4.

**Table S4.** The amount of the ligand immobilized on the chip. MT - *Mycobacterium tuberculosis*, human - *Homo sapiens*, Calb - *Candida albicans*, Cglab - *Candida glabrata*

| Ligands     | The amount of the ligand immobilized, RU |
|-------------|------------------------------------------|
| CYP51_MT    | 5499                                     |
| CYP124_MT   | 3315                                     |
| CYP125_MT   | 5730                                     |
| CYP126_MT   | 4590                                     |
| CYP142_MT   | 2445                                     |
| CYP51_human | 8286                                     |
| CYP51_Calb  | 2603                                     |
| CYP51_Cglab | 4888                                     |

A 10 mM stock solution of compound **1** was prepared using dimethyl sulfoxide. Next, a 100  $\mu$ M solution of the compound **1** was prepared using HBS-N buffer. Lower concentrations of **1** were prepared from a 100  $\mu$ M HBS-N solution with a buffer containing 1% DMSO. HBS-N buffer with 1% DMSO was also used as a working buffer for the biosensor.

The analysis was carried out at a temperature of 25 °C. The channel of the measuring cell with an immobilized ligand was used as the experimental channel. A channel in which the ligand was not immobilized was used as a control channel to level the signal from the nonspecific interaction of the analyte protein with the surface of the biosensor chip. The resulting sensorgram was the difference between the signals from the channel with the immobilized ligand and the control empty channel. Compound **1** in the concentration range of 10-100  $\mu$ M was injected over the surface of the chip with immobilized ligands for 210 s at a flow rate of 15  $\mu$ L/min. The dissociation of complexes was recorded for 900 s at the same flow rate. Regeneration of the chip surface after injection of the analyte was carried out by double injection of a regenerating solution of 2 M NaCl, 0.5% CHAPS for 30 s at a flow rate of 30  $\mu$ L/min.

The resulting sensorgrams were processed in the Biacore Insight Evaluation Program Version 3.0.11.15423 (Cytiva, USA). The two-state reaction model was chosen as a processing model corrected for the contribution of the refractive index (RI parameter, estimated individually for each sensorgram). Kinetic interaction parameters were calculated globally for the entire concentration range. The analysis results are shown in Table S5. Selection of the result of mathematical processing of sensorgrams was carried out on the basis of the minimum parameter chi2 (the standard deviation of the points of the calculated graph from the actual obtained sensorgram).

**Table S5.** Parameters of interaction of compound **1** with cytochromes of various organisms immobilized on the CM5 optical chip.

| Ligand   | ka1 (1/Mc x 10 <sup>2</sup> ) | kd1 (1/c x 10 <sup>-2</sup> ) | ka2 (1/c x 10 <sup>-3</sup> ) | kd2 (1/c x 10 <sup>-4</sup> ) | KD (mM) |
|----------|-------------------------------|-------------------------------|-------------------------------|-------------------------------|---------|
| CYP51_MT | 1,27                          | 2,21                          | 1,97                          | 12,5                          | 67,3    |

|             |       |      |      |      |      |
|-------------|-------|------|------|------|------|
| CYP124_MT   | 0,021 | 1,14 | 4,56 | 6,80 | 707  |
| CYP125_MT   | 1,11  | 2,32 | 2,29 | 8,18 | 55,3 |
| CYP126_MT   | 0,654 | 1,86 | 2,85 | 7,71 | 60,5 |
| CYP142_MT   | 0,137 | 1,70 | 4,64 | 6,99 | 163  |
| CYP51_human | 0,655 | 2,42 | 1,66 | 9,84 | 138  |
| CYP51_Calb  | 0,378 | 6,82 | 4,31 | 6,51 | 237  |
| CYP51_Cglab | 0,606 | 2,07 | 2,21 | 8,36 | 93,9 |
